# Supplementary material for: The relationship between causes of suicidal attempts in Iran and individual and social variables: a retrospective study
Source: BMC Psychiatry. 2022 Dec 12;22:780. doi: 10.1186/s12888-022-04449-2 (PMC9743690; doi:10.1186/s12888-022-04449-2)
Supplement: Supplementary file 1 — Additional file 1. [file 12888_2022_4449_MOESM1_ESM.xlsx]

## Sheet: Sheet1
code	سال	sex	insurance	marriedstatus	تایم	resident	income	SMOKING	ALCHOL	season	hourse	cause	GCS	outcome	education	age	ocopation	causeofsuicas	history	FHSUICIDE	HSLASTYEARS	PHILLNESS
1	1396	female	Not insu	Single	3	Rura	low	NO	NO	spring	1	alchol	10	live	Primary	20	non job	Falling	YES	NO	NO	NO
2	1396	female	Not insu	Widowed	2.5	Rura	low	NO	NO	summer	2	lorazpam	11	live	Primary	55	self emp	Familial	YES	NO	NO	NO
3	1396	male	Not insu	Single	2	Rura	low	YES	NO	autum	3	alminium	3	dead	Primary	46	self emp	Failure	YES	NO	NO	NO
4	1396	male	Not insu	Single	2.5	Rura	low	NO	NO	autum	4	multidru	13	live	Primary	57	self emp	Failure	YES	NO	NO	NO
5	1396	male	Not insu	Divorced	4	Rura	low	YES	NO	autum	5	alchol	10	live	Primary	55	non job	Economic	NO	NO	NO	NO
6	1396	male	Iran Hea	Widowed	3	Urban	miled	YES	NO	winter	6	detergen	15	live	High sch	52	self emp	Others	NO	NO	NO	NO
7	1396	male	Not insu	Married	3.5	Urban	low	YES	NO	spring	7	آمفت	12	live	High sch	48	employee	Familial	NO	NO	NO	NO
8	1396	male	Not insu	Married	2.5	Rura	low	YES	NO	summer	8	alminium	3	dead	Diploma	46	employee	Mental d	YES	NO	NO	NO
9	1396	male	Social S	Widowed	2	Rura	miled	NO	YES	autum	9	lorazpam	13	live	Diploma	60	employee	Failure	YES	NO	NO	NO
10	1396	male	Not insu	Divorced	1	Rura	low	YES	NO	autum	10	آمفت	10	live	Diploma	49	employee	Familial	YES	NO	NO	NO
11	1396	male	Iran Hea	Divorced	1.5	Rura	low	YES	NO	autum	11	TCA	15	live	High sch	50	self emp	Familial	YES	NO	NO	YES
12	1396	female	Not insu	Widowed	3	Urban	miled	NO	NO	spring	12	methadon	7	dead	High sch	55	non job	Familial	YES	NO	NO	NO
13	1396	male	Not insu	Widowed	3	Rura	low	YES	NO	summer	13	multidru	13	live	High sch	54	employee	Familial	YES	NO	NO	NO
14	1396	male	Not insu	Single	2	Rura	miled	YES	NO	autum	14	opium	13	live	High sch	51	employee	Addictio	NO	NO	NO	NO
15	1396	male	General	Married	2	Rura	low	YES	NO	autum	15	lorazpam	10	live	High sch	52	employee	Failure	YES	NO	NO	YES
16	1396	female	Not insu	Married	2.5	Urban	low	NO	NO	autum	16	lorazpam	15	live	High sch	57	non job	Economic	YES	YES	NO	YES
17	1396	male	Not insu	Single	2.5	Urban	miled	YES	NO	winter	17	tramadol	9	live	Primary	48	employee	Familial	YES	NO	NO	NO
18	1396	male	Others	Widowed	3	Rura	low	YES	NO	winter	18	detergen	15	live	High sch	52	self emp	Others	YES	NO	NO	NO
19	1396	female	Not insu	Single	3.5	Rura	miled	NO	NO	spring	19	TCA	8	live	High sch	35	non job	Economic	NO	YES	NO	YES
20	1396	female	Not insu	Single	4	Rura	miled	NO	NO	summer	20	lorazpam	8	live	Primary	52	non job	Failure	YES	NO	NO	YES
21	1396	male	Iran Hea	Single	4	Urban	high	YES	NO	autum	21	lorazpam	9	live	Diploma	34	employee	Failure	YES	NO	NO	NO
22	1396	male	Social S	Single	1.55	Urban	high	YES	NO	autum	22	lorazpam	13	live	Primary	52	employee	Failure	NO	YES	NO	YES
23	1396	male	Social S	Single	1	Urban	miled	NO	NO	autum	23	opium	13	live	High sch	52	employee	Addictio	NO	YES	NO	NO
24	1396	male	Iran Hea	Single	2.5	Rura	high	YES	NO	winter	24	pedistum	10	live	High sch	46	self emp	Economic	YES	YES	NO	NO
25	1396	male	Not insu	Married	2	Urban	miled	YES	YES	winter	1	opium	8	live	Primary	45	employee	Addictio	YES	NO	NO	NO
26	1396	female	Not insu	Single	3	Rura	low	NO	NO	spring	2	alchol	8	live	Primary	18	self emp	Falling	NO	NO	NO	NO
27	1396	female	Not insu	Widowed	2.5	Rura	low	NO	NO	spring	3	lorazpam	9	live	Primary	55	self emp	Failure	NO	NO	NO	NO
28	1396	male	Not insu	Single	2	Rura	low	YES	NO	summer	4	lorazpam	13	live	Primary	46	self emp	Failure	NO	NO	NO	NO
29	1396	male	Not insu	Single	2.5	Rura	low	YES	NO	autum	5	lorazpam	13	live	Primary	52	non job	Failure	YES	NO	NO	YES
30	1396	male	Not insu	Divorced	4	Rura	low	YES	NO	autum	6	alchol	8	live	Primary	19	self emp	Falling	NO	NO	NO	YES
31	1396	male	Iran Hea	Widowed	3	Urban	miled	YES	NO	autum	7	lorazpam	8	live	High sch	52	self emp	Economic	NO	NO	NO	NO
32	1396	male	Not insu	Married	3.5	Urban	low	YES	NO	winter	8	آمفت	8	live	High sch	48	employee	Familial	NO	NO	NO	YES
33	1396	male	Not insu	Married	2.5	Rura	low	YES	NO	spring	9	TCA	8	live	Diploma	46	employee	Mental d	YES	NO	NO	NO
34	1396	male	Social S	Widowed	2	Rura	miled	NO	NO	summer	10	lorazpam	9	live	Diploma	60	employee	Failure	YES	NO	NO	NO
35	1396	male	General	Married	2	Rura	low	YES	NO	autum	11	multidru	13	live	High sch	52	employee	Failure	YES	NO	NO	YES
36	1396	female	Not insu	Married	2.5	Urban	low	NO	NO	autum	12	lorazpam	8	live	High sch	57	non job	Failure	YES	YES	NO	YES
37	1396	male	Not insu	Single	2.5	Urban	miled	YES	NO	autum	13	tramadol	8	live	Primary	48	employee	Economic	YES	NO	NO	NO
38	1396	male	Others	Widowed	3	Rura	low	YES	NO	spring	14	آمفت	9	live	High sch	43	self emp	Familial	YES	NO	NO	NO
39	1396	female	Not insu	Single	3.5	Rura	miled	NO	NO	summer	15	detergen	15	live	High sch	52	self emp	Others	NO	YES	NO	NO
40	1396	female	Not insu	Single	4	Rura	miled	NO	NO	autum	16	lorazpam	9	live	Primary	52	self emp	Failure	YES	NO	NO	NO
41	1396	male	Iran Hea	Single	4	Urban	high	YES	NO	autum	17	lorazpam	12	live	Diploma	52	self emp	Failure	YES	NO	NO	NO
42	1396	male	Social S	Single	1.55	Urban	high	YES	NO	autum	18	lorazpam	13	live	Primary	52	non job	Failure	NO	YES	NO	YES
43	1396	male	Social S	Single	1	Urban	miled	YES	NO	winter	19	opium	9	live	High sch	36	self emp	Addictio	NO	YES	NO	NO
44	1396	male	Iran Hea	Single	2.5	Rura	high	YES	NO	winter	20	pedistum	7	dead	High sch	46	self emp	Economic	YES	YES	NO	NO
45	1396	male	Not insu	Married	2	Urban	miled	YES	NO	spring	21	opium	13	live	Primary	45	employee	Addictio	YES	NO	NO	NO
46	1396	male	Iran Hea	Single	4	Urban	high	YES	NO	summer	22	lorazpam	11	live	Diploma	52	employee	Failure	YES	NO	NO	NO
47	1396	male	Social S	Single	1.55	Urban	high	YES	NO	autum	23	lorazpam	10	live	Primary	52	employee	Failure	NO	YES	NO	YES
48	1396	male	Social S	Single	1	Urban	miled	YES	NO	autum	24	multidru	9	live	High sch	52	employee	Addictio	NO	YES	NO	NO
49	1396	male	Iran Hea	Single	2.5	Rura	high	NO	NO	autum	1	pedistum	7	live	High sch	46	self emp	Economic	YES	YES	NO	NO
50	1396	male	Not insu	Married	2	Urban	miled	YES	NO	winter	2	opium	9	live	Primary	45	employee	Addictio	YES	NO	NO	NO
51	1396	female	Not insu	Single	5	Rura	low	NO	NO	winter	3	آمفت	12	live	High sch	48	non job	Economic	YES	YES	NO	NO
52	1396	male	Not insu	Widowed	4	Urban	low	YES	NO	spring	4	TCA	6	dead	High sch	49	employee	Familial	NO	NO	NO	NO
53	1396	male	Not insu	Divorced	7	Rura	low	YES	NO	spring	5	آمفت	11	live	High sch	74	employee	Economic	NO	NO	NO	NO
54	1396	female	Not insu	Married	6	Rura	low	NO	NO	summer	6	TCA	10	live	Primary	75	non job	Mental d	NO	YES	NO	NO
55	1396	male	Iran Hea	Single	4	Rura	high	YES	NO	autum	7	lorazpam	9	live	Primary	65	employee	Familial	YES	NO	NO	NO
56	1396	male	Social S	Widowed	3	Rura	low	YES	NO	autum	8	lorazpam	12	live	High sch	69	self emp	Failure	YES	NO	NO	YES
57	1396	female	Social S	Divorced	2	Rura	miled	NO	NO	autum	9	lorazpam	13	live	Primary	56	self emp	Failure	YES	YES	NO	YES
58	1396	male	Iran Hea	Single	1.5	Urban	low	YES	NO	winter	10	alminium	3	dead	Diploma	58	self emp	Failure	NO	NO	YES	YES
59	1396	male	Not insu	Widowed	0.5	Rura	low	YES	NO	spring	11	detergen	15	live	Primary	69	non job	Others	YES	NO	NO	YES
60	1396	male	Not insu	Divorced	6	Rura	miled	YES	NO	summer	12	alchol	12	live	Diploma	19	self emp	Falling	YES	NO	NO	NO
61	1396	female	Not insu	Widowed	3	Rura	miled	NO	NO	autum	13	alchol	13	live	Primary	22	non job	Falling	YES	YES	NO	NO
62	1396	female	Not insu	Widowed	1	Rura	miled	NO	NO	autum	14	lorazpam	11	live	High sch	33	non job	Failure	NO	NO	NO	NO
63	1396	male	Not insu	Single	2	Urban	low	YES	NO	autum	15	lorazpam	10	live	Primary	45	employee	Failure	YES	NO	NO	YES
64	1396	male	Not insu	Divorced	2.5	Rura	low	YES	NO	spring	16	alchol	9	live	High sch	43	employee	Economic	NO	NO	NO	YES
65	1396	female	Iran Hea	Married	2.5	Rura	low	NO	NO	summer	17	opium	7	live	Diploma	37	self emp	Familial	NO	NO	YES	NO
66	1396	male	Social S	Married	2	Rura	high	YES	NO	autum	18	آمفت	12	live	Diploma	39	self emp	Economic	YES	NO	NO	NO
67	1396	male	Not insu	Married	3	Rura	low	YES	NO	autum	19	TCA	6	dead	Primary	54	employee	Familial	YES	NO	NO	NO
68	1396	male	Iran Hea	Single	3	Urban	low	NO	NO	autum	20	tramadol	11	live	High sch	45	self emp	Familial	YES	NO	NO	NO
69	1396	male	Iran Hea	Widowed	4	Rura	low	YES	NO	winter	21	multidru	10	live	Primary	22	self emp	Falling	YES	NO	NO	NO
70	1396	female	Not insu	Divorced	5	Rura	miled	NO	NO	winter	22	lorazpam	9	live	Primary	65	non job	Failure	YES	YES	NO	YES
71	1396	male	Not insu	Single	2	Urban	low	YES	NO	spring	23	lorazpam	12	live	Primary	54	employee	Failure	YES	NO	NO	YES
72	1396	male	Not insu	Divorced	2.5	Rura	low	YES	NO	summer	24	alchol	13	live	High sch	23	employee	Falling	NO	NO	NO	YES
73	1396	female	Iran Hea	Married	2.5	Rura	low	NO	NO	autum	1	opium	11	live	Diploma	65	self emp	Economic	NO	NO	YES	NO
74	1396	male	Social S	Married	2	Rura	high	YES	NO	autum	2	آمفت	10	live	Diploma	39	self emp	Familial	YES	NO	NO	NO
75	1396	male	Not insu	Married	3	Rura	low	YES	NO	autum	3	TCA	6	dead	Primary	54	employee	Economic	YES	NO	NO	NO
76	1396	male	Iran Hea	Single	3	Urban	low	YES	NO	winter	4	detergen	15	live	High sch	45	self emp	Mental d	YES	NO	YES	NO
77	1396	male	Iran Hea	Widowed	4	Rura	low	YES	NO	winter	5	alchol	12	live	Primary	46	self emp	Familial	YES	NO	NO	NO
78	1396	female	Not insu	Divorced	5	Rura	miled	NO	NO	spring	6	lorazpam	13	live	Primary	65	non job	Failure	YES	YES	NO	YES
79	1396	female	Not insu	Single	3	Rura	low	NO	NO	spring	7	alchol	11	live	Primary	22	non job	Falling	YES	NO	NO	NO
80	1396	female	Not insu	Widowed	2.5	Rura	low	NO	NO	summer	8	lorazpam	10	live	Primary	55	employee	Failure	YES	NO	NO	NO
81	1396	male	Not insu	Single	2	Rura	low	YES	NO	autum	9	lorazpam	9	live	Primary	46	self emp	Failure	YES	NO	NO	NO
82	1396	male	Not insu	Single	2.5	Rura	low	YES	NO	autum	10	lorazpam	12	live	Primary	57	self emp	Failure	YES	NO	NO	YES
83	1396	male	Not insu	Divorced	4	Rura	low	YES	NO	autum	11	alchol	13	live	Primary	20	self emp	Falling	NO	NO	NO	YES
84	1396	male	Iran Hea	Widowed	3	Urban	miled	NO	NO	winter	12	lorazpam	11	live	High sch	52	non job	Economic	NO	NO	NO	NO
85	1396	male	Not insu	Married	3.5	Urban	low	NO	NO	spring	13	آمفت	10	live	High sch	48	self emp	Familial	NO	NO	NO	YES
86	1396	male	Not insu	Married	2.5	Rura	low	YES	NO	summer	14	TCA	9	live	Diploma	46	self emp	Economic	YES	NO	NO	NO
87	1396	male	Social S	Widowed	2	Rura	miled	YES	NO	autum	15	lorazpam	12	live	Diploma	60	non job	Economic	YES	NO	NO	NO
88	1396	male	Not insu	Divorced	1	Rura	low	YES	NO	autum	16	آمفت	13	live	Diploma	49	non job	Mental d	YES	NO	YES	NO
89	1396	male	Iran Hea	Divorced	1.5	Rura	low	YES	NO	autum	17	TCA	6	dead	High sch	50	self emp	Familial	YES	NO	NO	YES
90	1396	female	Not insu	Widowed	3	Urban	miled	NO	NO	spring	18	methadon	9	live	High sch	55	non job	Familial	YES	NO	NO	NO
91	1396	male	Not insu	Widowed	3	Rura	low	YES	NO	summer	19	multidru	12	live	High sch	54	non job	Familial	YES	NO	NO	NO
92	1396	male	Not insu	Single	2	Rura	miled	YES	NO	autum	20	opium	13	live	High sch	51	non job	Addictio	NO	NO	NO	NO
93	1396	male	General	Married	2	Rura	low	YES	NO	autum	21	lorazpam	11	live	High sch	52	employee	Failure	YES	NO	NO	YES
94	1396	female	Not insu	Married	2.5	Urban	low	NO	NO	autum	22	detergen	15	live	High sch	57	self emp	Others	YES	YES	NO	YES
95	1396	male	Not insu	Single	2.5	Urban	miled	YES	NO	winter	23	alminium	3	dead	Primary	48	self emp	Familial	YES	NO	NO	NO
96	1396	male	Others	Widowed	3	Rura	low	YES	NO	winter	24	آمفت	12	live	High sch	43	self emp	Economic	YES	NO	NO	NO
97	1396	female	Not insu	Single	3.5	Rura	miled	NO	NO	spring	1	TCA	6	dead	High sch	35	non job	Familial	NO	YES	NO	YES
98	1396	female	Not insu	Single	4	Rura	miled	NO	NO	summer	2	lorazpam	11	live	Primary	36	self emp	Familial	YES	NO	NO	YES
99	1396	male	Iran Hea	Single	4	Urban	high	YES	NO	autum	3	alminium	3	dead	Diploma	34	self emp	Failure	YES	NO	NO	NO
100	1396	male	Social S	Single	1.55	Urban	high	NO	NO	autum	4	lorazpam	12	live	Primary	35	non job	Failure	NO	YES	NO	YES
101	1396	male	Social S	Single	1	Urban	miled	YES	NO	autum	5	opium	13	live	High sch	36	employee	Mental d	NO	YES	YES	NO
102	1396	male	Iran Hea	Single	2.5	Rura	high	YES	NO	winter	6	alminium	3	dead	High sch	46	self emp	Economic	YES	YES	NO	NO
103	1396	male	Not insu	Married	2	Urban	miled	NO	NO	winter	7	opium	12	live	Primary	45	employee	Addictio	YES	NO	NO	NO
104	1396	female	Not insu	Single	3	Rura	low	NO	NO	spring	8	alchol	13	live	Primary	19	non job	Falling	YES	NO	NO	NO
105	1396	female	Not insu	Widowed	2.5	Rura	low	NO	NO	spring	9	alminium	3	dead	Primary	55	non job	Failure	YES	NO	NO	NO
106	1396	male	Not insu	Single	2	Rura	low	YES	NO	summer	10	lorazpam	12	live	Primary	46	employee	Failure	YES	NO	NO	NO
107	1396	male	Not insu	Single	2.5	Rura	low	YES	NO	autum	11	multidru	13	live	Primary	57	self emp	Economic	YES	NO	NO	YES
108	1396	male	Not insu	Divorced	4	Rura	low	YES	NO	autum	12	alchol	11	live	Primary	55	self emp	Familial	NO	NO	NO	YES
109	1396	male	Iran Hea	Widowed	3	Urban	miled	YES	NO	autum	13	lorazpam	10	live	High sch	52	self emp	Economic	NO	NO	NO	NO
110	1396	male	Not insu	Married	3.5	Urban	low	YES	NO	winter	14	detergen	15	live	High sch	48	non job	Others	NO	NO	NO	YES
111	1396	male	Not insu	Married	2.5	Rura	low	YES	NO	spring	15	alminium	12	dead	Diploma	46	self emp	Familial	YES	NO	NO	NO
112	1396	male	Social S	Widowed	2	Rura	miled	NO	NO	summer	16	lorazpam	13	live	Diploma	60	self emp	Failure	YES	NO	NO	NO
113	1396	male	General	Married	2	Rura	low	YES	NO	autum	17	alminium	11	dead	High sch	52	non job	Failure	YES	NO	NO	YES
114	1396	female	Not insu	Married	2.5	Urban	low	NO	NO	autum	18	lorazpam	10	live	High sch	57	non job	Economic	YES	YES	NO	YES
115	1396	male	Not insu	Single	2.5	Urban	miled	YES	NO	autum	19	tramadol	9	live	Primary	48	self emp	Mental d	YES	NO	YES	NO
116	1396	male	Others	Widowed	3	Rura	low	YES	NO	spring	20	alminium	3	dead	High sch	43	self emp	Familial	YES	NO	NO	NO
117	1396	female	Not insu	Single	3.5	Rura	miled	NO	NO	summer	21	alminium	3	dead	High sch	35	non job	Familial	NO	YES	NO	NO
118	1396	female	Not insu	Single	4	Rura	miled	NO	NO	autum	22	lorazpam	9	live	Primary	36	non job	Failure	YES	NO	NO	NO
119	1396	male	Iran Hea	Single	4	Urban	high	YES	NO	autum	23	alminium	3	dead	Diploma	34	employee	Failure	YES	NO	NO	NO
120	1396	male	Social S	Single	1.55	Urban	high	YES	NO	autum	24	lorazpam	12	live	Primary	35	self emp	Failure	NO	YES	NO	NO
121	1396	male	Social S	Single	1	Urban	miled	YES	NO	winter	1	opium	13	live	High sch	36	self emp	Addictio	NO	YES	NO	NO
122	1396	male	Iran Hea	Single	2.5	Rura	high	YES	NO	winter	2	pedistum	11	live	High sch	46	non job	Economic	YES	YES	NO	NO
123	1396	male	Not insu	Married	2	Urban	miled	YES	NO	spring	3	opium	10	live	Primary	45	non job	Addictio	YES	NO	NO	NO
124	1396	male	Iran Hea	Single	4	Urban	high	YES	NO	summer	4	lorazpam	9	live	Diploma	34	employee	Failure	YES	NO	NO	NO
125	1396	male	Social S	Single	1.55	Urban	high	YES	NO	autum	5	lorazpam	7	live	Primary	35	self emp	Failure	NO	YES	NO	YES
126	1396	male	Social S	Single	1	Urban	miled	YES	NO	autum	6	opium	9	live	High sch	36	self emp	Addictio	NO	YES	NO	NO
127	1396	male	Iran Hea	Single	2.5	Rura	high	YES	NO	autum	7	pedistum	10	live	High sch	46	self emp	Economic	YES	YES	NO	NO
128	1396	male	Not insu	Married	2	Urban	miled	YES	NO	winter	8	multidru	9	live	Primary	45	non job	Economic	YES	NO	NO	NO
129	1396	female	Not insu	Single	5	Rura	low	NO	NO	winter	9	alminium	7	dead	High sch	48	self emp	Economic	YES	YES	NO	NO
130	1396	male	Not insu	Widowed	4	Urban	low	NO	NO	spring	10	alminium	10	dead	High sch	49	self emp	Mental d	NO	NO	YES	NO
131	1396	male	Not insu	Divorced	7	Rura	low	YES	NO	spring	11	آمفت	9	live	High sch	74	non job	Economic	NO	NO	NO	NO
132	1396	female	Not insu	Married	6	Rura	low	NO	NO	summer	12	TCA	7	live	Primary	75	non job	Familial	NO	YES	NO	NO
133	1396	male	Iran Hea	Single	4	Rura	high	YES	NO	autum	13	alminium	3	dead	Primary	65	employee	Familial	YES	NO	NO	NO
134	1396	male	Social S	Widowed	3	Rura	low	YES	NO	autum	14	lorazpam	10	live	High sch	69	self emp	Failure	YES	NO	YES	YES
135	1396	female	Social S	Divorced	2	Rura	miled	NO	NO	autum	15	lorazpam	9	live	Primary	56	self emp	Failure	YES	YES	NO	YES
136	1396	male	Iran Hea	Single	1.5	Urban	low	NO	NO	winter	16	lorazpam	7	live	Diploma	58	self emp	Failure	NO	NO	NO	YES
137	1396	male	Not insu	Widowed	0.5	Rura	low	YES	NO	spring	17	lorazpam	9	live	Primary	69	non job	Failure	YES	NO	NO	YES
138	1396	male	Not insu	Divorced	6	Rura	miled	YES	NO	summer	18	alchol	10	live	Diploma	23	self emp	Falling	YES	NO	NO	NO
139	1396	female	Not insu	Widowed	3	Rura	miled	NO	NO	autum	19	alchol	9	live	Primary	19	self emp	Falling	YES	YES	NO	NO
140	1396	female	Not insu	Widowed	1	Rura	miled	NO	NO	autum	20	lorazpam	10	live	High sch	55	non job	Failure	NO	NO	NO	NO
141	1396	male	Not insu	Single	2	Urban	low	YES	NO	autum	21	lorazpam	9	live	Primary	54	non job	Failure	YES	NO	NO	NO
142	1396	male	Not insu	Divorced	2.5	Rura	low	YES	NO	spring	22	multidru	7	live	High sch	20	employee	Falling	NO	NO	NO	NO
143	1396	female	Iran Hea	Married	2.5	Rura	low	NO	NO	summer	23	opium	9	live	Diploma	37	self emp	Mental d	NO	NO	YES	NO
144	1396	male	Social S	Married	2	Rura	high	YES	NO	autum	24	alminium	3	dead	Diploma	39	self emp	Familial	YES	NO	NO	NO
145	1396	male	Not insu	Married	3	Rura	low	YES	NO	autum	1	alminium	3	dead	Primary	54	employee	Economic	YES	NO	NO	NO
146	1396	male	Iran Hea	Single	3	Urban	low	YES	NO	autum	2	tramadol	10	live	High sch	45	self emp	Familial	YES	NO	NO	NO
147	1396	male	Iran Hea	Widowed	4	Rura	low	YES	NO	winter	3	alchol	9	live	Primary	46	self emp	Familial	YES	NO	NO	NO
148	1396	female	Not insu	Divorced	5	Rura	miled	NO	NO	winter	4	lorazpam	10	live	Primary	65	non job	Failure	YES	YES	NO	YES
149	1396	male	Not insu	Single	2	Urban	low	YES	NO	spring	5	lorazpam	9	live	Primary	54	non job	Failure	YES	NO	NO	YES
150	1396	male	Not insu	Divorced	2.5	Rura	low	YES	NO	summer	6	alchol	10	live	High sch	19	non job	Falling	NO	NO	NO	YES
152	1396	female	Iran Hea	Married	2.5	Rura	low	NO	NO	autum	7	opium	9	live	Diploma	37	employee	Economic	NO	NO	YES	NO
153	1396	male	Social S	Married	2	Rura	high	YES	NO	autum	8	آمفت	7	live	Diploma	39	self emp	Economic	YES	NO	NO	NO
154	1396	male	Not insu	Married	3	Rura	low	YES	NO	autum	9	pedistum	9	live	Primary	54	self emp	Familial	YES	NO	YES	NO
155	1396	male	Iran Hea	Single	3	Urban	low	YES	NO	winter	10	tramadol	10	live	High sch	45	self emp	Mental d	YES	NO	YES	NO
156	1396	male	Iran Hea	Widowed	4	Rura	low	YES	NO	winter	11	multidru	9	live	Primary	19	non job	Falling	YES	NO	NO	NO
157	1396	female	Not insu	Divorced	5	Rura	miled	NO	NO	spring	12	lorazpam	10	live	Primary	65	non job	Failure	YES	YES	NO	YES
158	1396	male	Not insu	Single	2.5	Rura	low	YES	NO	spring	13	lorazpam	9	live	Primary	57	non job	Failure	YES	NO	NO	YES
159	1396	male	Not insu	Divorced	4	Rura	low	YES	NO	summer	14	alchol	10	live	Primary	18	non job	Falling	NO	NO	NO	YES
160	1396	male	Iran Hea	Widowed	3	Urban	miled	YES	NO	autum	15	alminium	9	dead	High sch	52	employee	Economic	NO	NO	NO	NO
161	1396	male	Not insu	Married	3.5	Urban	low	YES	NO	autum	16	آمفت	10	live	High sch	48	self emp	Familial	NO	NO	NO	YES
162	1396	male	Not insu	Married	2.5	Rura	low	YES	NO	autum	17	alminium	3	dead	Diploma	46	self emp	Economic	YES	NO	NO	NO
163	1396	male	Social S	Widowed	2	Rura	miled	NO	NO	winter	18	lorazpam	10	live	Diploma	60	self emp	Economic	YES	NO	NO	NO
164	1396	male	Not insu	Divorced	1	Rura	low	YES	NO	spring	19	آمفت	8	live	Diploma	49	non job	Familial	YES	NO	NO	NO
165	1396	male	Iran Hea	Divorced	1.5	Rura	low	YES	NO	summer	20	TCA	6	dead	High sch	50	self emp	Familial	YES	NO	NO	YES
166	1396	female	Not insu	Widowed	3	Urban	miled	NO	NO	autum	21	methadon	9	live	High sch	55	non job	Familial	YES	NO	NO	NO
167	1396	male	Not insu	Widowed	3	Rura	low	YES	NO	autum	22	methadon	9	live	High sch	54	non job	Familial	YES	NO	NO	NO
168	1396	male	Not insu	Single	2	Rura	miled	YES	NO	autum	23	opium	10	live	High sch	51	employee	Addictio	NO	NO	NO	NO
169	1396	male	General	Married	2	Rura	low	YES	NO	spring	24	lorazpam	9	live	High sch	52	self emp	Failure	YES	NO	NO	YES
170	1396	female	Not insu	Married	2.5	Urban	low	NO	NO	summer	1	alminium	10	dead	High sch	57	self emp	Mental d	YES	YES	YES	YES
171	1396	male	Not insu	Single	2.5	Urban	miled	YES	NO	autum	2	tramadol	9	live	Primary	48	self emp	Familial	YES	NO	NO	NO
172	1396	male	Others	Widowed	3	Rura	low	YES	NO	autum	3	antiepli	7	live	High sch	43	non job	Economic	YES	NO	NO	NO
173	1396	female	Not insu	Single	3.5	Rura	miled	NO	NO	autum	4	tramadol	10	live	High sch	35	self emp	Familial	NO	YES	YES	NO
174	1396	female	Not insu	Single	4	Rura	miled	NO	NO	winter	5	lorazpam	9	live	Primary	36	self emp	Familial	YES	NO	NO	NO
175	1396	male	Iran Hea	Single	4	Urban	high	YES	NO	winter	6	lorazpam	10	live	Diploma	34	non job	Failure	YES	NO	NO	NO
176	1396	male	Social S	Single	1.55	Urban	high	YES	NO	spring	7	heart	9	live	Primary	35	non job	Failure	NO	YES	NO	NO
177	1396	male	Social S	Single	1	Urban	miled	YES	NO	summer	8	opium	7	live	High sch	36	self emp	Addictio	NO	YES	NO	NO
178	1396	male	Iran Hea	Single	2.5	Rura	high	YES	NO	autum	9	alminium	3	dead	High sch	46	non job	Economic	YES	YES	NO	NO
179	1396	male	Not insu	Married	2	Urban	miled	YES	NO	autum	10	opium	10	live	Primary	45	employee	Addictio	YES	NO	NO	NO
180	1396	female	Not insu	Single	3	Rura	low	NO	NO	autum	11	alchol	9	live	Primary	45	non job	Economic	YES	NO	NO	NO
181	1396	female	Not insu	Widowed	2.5	Rura	low	NO	NO	spring	12	lorazpam	10	live	Primary	55	non job	Familial	YES	NO	NO	NO
182	1396	male	Not insu	Single	2	Rura	low	YES	NO	summer	13	lorazpam	9	live	Primary	46	employee	Familial	YES	NO	NO	NO
183	1396	male	Not insu	Single	2.5	Rura	low	NO	NO	autum	14	lorazpam	7	live	Primary	57	self emp	Economic	YES	NO	NO	YES
184	1396	male	Not insu	Married	3.5	Urban	low	YES	NO	autum	15	alminium	3	dead	High sch	48	self emp	Familial	NO	NO	NO	YES
185	1396	male	Not insu	Married	2.5	Rura	low	YES	NO	autum	16	TCA	6	dead	Diploma	46	self emp	Familial	YES	NO	NO	NO
186	1396	male	Social S	Widowed	2	Rura	miled	YES	NO	winter	17	lorazpam	9	live	Diploma	60	non job	Failure	YES	NO	NO	NO
187	1396	male	General	Married	2	Rura	low	YES	NO	spring	18	lorazpam	10	live	High sch	52	self emp	Failure	YES	NO	NO	YES
188	1396	female	Not insu	Married	2.5	Urban	low	NO	NO	summer	19	detergen	15	live	High sch	57	non job	Mental d	YES	YES	YES	YES
189	1396	male	Not insu	Single	2.5	Urban	miled	YES	NO	autum	20	tramadol	13	live	Primary	22	non job	Familial	YES	NO	NO	NO
190	1396	male	Others	Widowed	3	Rura	low	YES	NO	autum	21	آمفت	9	live	High sch	43	non job	Economic	YES	NO	NO	NO
191	1396	female	Not insu	Single	3.5	Rura	miled	NO	NO	autum	22	TCA	6	dead	High sch	35	employee	Familial	NO	YES	NO	YES
191	1396	female	Not insu	Single	4	Rura	miled	NO	NO	spring	23	lorazpam	10	live	Primary	36	self emp	Familial	YES	NO	NO	YES
192	1396	male	Iran Hea	Single	4	Urban	high	YES	NO	summer	24	heart	13	live	Diploma	34	self emp	Failure	YES	NO	NO	NO
193	1396	male	Social S	Single	1.55	Urban	high	YES	NO	autum	1	lorazpam	11	live	Primary	35	self emp	Failure	NO	YES	NO	YES
194	1396	male	Social S	Single	1	Urban	miled	NO	NO	autum	2	opium	9	live	High sch	36	non job	Addictio	NO	YES	NO	NO
195	1396	male	Iran Hea	Single	2.5	Rura	high	YES	NO	autum	3	pedistum	8	live	High sch	46	self emp	Economic	YES	YES	NO	NO
196	1396	male	Not insu	Married	2	Urban	miled	YES	NO	winter	4	opium	6	live	Primary	45	employee	Addictio	YES	NO	NO	NO
197	1396	female	Not insu	Single	3	Rura	low	NO	NO	winter	5	alchol	12	live	Primary	21	non job	Falling	YES	NO	NO	NO
198	1396	female	Not insu	Widowed	2.5	Rura	low	NO	NO	spring	6	lorazpam	8	live	Primary	55	non job	Failure	YES	NO	NO	NO
199	1396	male	Not insu	Single	2	Rura	low	YES	NO	summer	7	lorazpam	8	live	Primary	46	employee	Failure	YES	NO	NO	NO
200	1396	male	Not insu	Single	2.5	Rura	low	YES	NO	autum	8	lorazpam	6	live	Primary	57	self emp	Failure	YES	NO	NO	NO
201	1396	male	Not insu	Divorced	4	Rura	low	YES	NO	autum	9	heart	12	live	Primary	19	non job	Falling	NO	NO	NO	NO
202	1396	male	Iran Hea	Widowed	3	Urban	miled	YES	NO	autum	10	lorazpam	8	live	High sch	52	non job	Failure	NO	NO	NO	NO
203	1396	male	Not insu	Married	3.5	Urban	low	YES	NO	winter	11	آمفت	8	live	High sch	48	employee	Economic	NO	NO	NO	NO
204	1396	male	Not insu	Married	2.5	Rura	low	YES	NO	winter	12	TCA	6	dead	Diploma	46	self emp	Familial	YES	NO	NO	NO
205	1396	male	Social S	Widowed	2	Rura	miled	YES	NO	spring	13	lorazpam	8	live	Diploma	60	self emp	Economic	YES	NO	NO	NO
206	1396	male	Not insu	Divorced	1	Rura	low	YES	NO	spring	14	alchol	13	live	Diploma	49	self emp	Familial	YES	NO	NO	NO
207	1396	male	Iran Hea	Divorced	1.5	Rura	low	YES	NO	summer	15	TCA	6	dead	High sch	50	non job	Familial	YES	NO	NO	YES
208	1396	female	Not insu	Widowed	3	Urban	miled	NO	NO	autum	16	methadon	9	live	High sch	55	self emp	Mental d	YES	NO	NO	NO
209	1396	male	Not insu	Widowed	3	Rura	low	YES	NO	autum	17	methadon	9	live	High sch	54	self emp	Familial	YES	NO	NO	NO
210	1396	male	Not insu	Single	2	Rura	miled	YES	NO	autum	18	opium	6	live	High sch	51	non job	Addictio	NO	NO	NO	NO
211	1396	male	General	Married	2	Rura	low	YES	NO	winter	19	lorazpam	12	live	High sch	52	employee	Economic	YES	NO	NO	YES
212	1396	female	Not insu	Married	2.5	Urban	low	NO	NO	spring	20	lorazpam	8	live	High sch	57	non job	Familial	YES	YES	NO	YES
213	1396	male	Not insu	Single	2.5	Urban	miled	YES	NO	summer	21	tramadol	6	live	Primary	48	employee	Economic	YES	NO	NO	NO
214	1396	male	Others	Widowed	3	Rura	low	YES	NO	autum	22	lorazpam	12	live	High sch	43	non job	Familial	YES	NO	NO	NO
215	1396	female	Not insu	Single	3.5	Rura	miled	NO	NO	autum	23	TCA	6	dead	High sch	35	non job	Familial	NO	YES	NO	YES
216	1396	female	Not insu	Single	4	Rura	miled	NO	NO	autum	24	heart	6	live	Primary	36	employee	Failure	YES	NO	NO	NO
217	1396	male	Iran Hea	Single	4	Urban	high	YES	NO	spring	1	lorazpam	12	live	Diploma	34	self emp	Failure	YES	NO	NO	NO
218	1396	male	Social S	Single	1.55	Urban	high	YES	NO	summer	2	lorazpam	8	live	Primary	35	self emp	Failure	NO	YES	NO	NO
219	1396	male	Social S	Single	1	Urban	miled	YES	NO	autum	3	opium	8	live	High sch	36	self emp	Economic	NO	YES	NO	NO
220	1396	male	Iran Hea	Single	2.5	Rura	high	YES	NO	autum	4	pedistum	10	live	High sch	46	non job	Familial	YES	YES	NO	NO
221	1396	male	Not insu	Married	2	Urban	miled	YES	NO	autum	5	opium	8	live	Primary	45	self emp	Familial	YES	NO	NO	NO
222	1396	female	Not insu	Single	3	Rura	low	NO	NO	winter	6	alminium	3	dead	Primary	21	self emp	Falling	YES	NO	NO	NO
223	1396	female	Not insu	Widowed	2.5	Rura	low	NO	NO	winter	7	lorazpam	10	live	Primary	55	non job	Mental d	YES	NO	NO	NO
224	1396	male	Not insu	Single	2	Rura	low	YES	NO	spring	8	lorazpam	8	live	Primary	46	non job	Failure	YES	NO	NO	NO
225	1396	male	Not insu	Single	2.5	Rura	low	YES	NO	summer	9	lorazpam	5	live	Primary	57	employee	Failure	YES	NO	NO	YES
226	1396	male	Not insu	Divorced	4	Rura	low	YES	NO	autum	10	alchol	9	live	Primary	18	self emp	Falling	NO	NO	NO	YES
227	1396	male	Iran Hea	Widowed	3	Urban	miled	YES	NO	autum	11	lorazpam	9	live	High sch	52	self emp	Economic	NO	NO	NO	NO
228	1396	male	Not insu	Married	3.5	Urban	low	NO	NO	autum	12	pedistum	10	live	High sch	48	self emp	Familial	NO	NO	NO	YES
229	1396	male	Not insu	Married	2.5	Rura	low	YES	NO	winter	13	TCA	6	dead	Diploma	46	non job	Economic	YES	NO	NO	NO
230	1396	male	Social S	Widowed	2	Rura	miled	YES	NO	winter	14	lorazpam	10	live	Diploma	60	self emp	Familial	YES	NO	NO	NO
231	1396	male	General	Married	2	Rura	low	YES	NO	spring	15	lorazpam	8	live	High sch	52	self emp	Familial	YES	NO	NO	NO
232	1396	female	Not insu	Married	2.5	Urban	low	NO	NO	spring	16	alminium	3	dead	High sch	57	non job	Economic	YES	YES	NO	NO
233	1396	male	Not insu	Single	2.5	Urban	miled	YES	NO	summer	17	tramadol	10	live	Primary	48	employee	Economic	YES	NO	NO	NO
234	1396	male	Others	Widowed	3	Rura	low	NO	NO	autum	18	heart	8	live	High sch	43	self emp	Familial	YES	NO	NO	NO
235	1396	female	Not insu	Single	3.5	Rura	miled	NO	NO	autum	19	opium	5	live	High sch	35	non job	Familial	NO	YES	NO	NO
236	1396	female	Not insu	Single	4	Rura	miled	NO	NO	autum	20	lorazpam	9	live	Primary	36	non job	Failure	YES	NO	NO	NO
237	1396	male	Iran Hea	Single	4	Urban	high	YES	NO	winter	21	lorazpam	9	live	Diploma	34	non job	Failure	YES	NO	NO	NO
238	1396	male	Social S	Single	1.55	Urban	high	YES	NO	spring	22	heart	10	live	Primary	35	employee	Failure	NO	YES	NO	NO
239	1396	male	Social S	Single	1	Urban	miled	YES	NO	summer	23	opium	9	live	High sch	36	self emp	Economic	NO	YES	NO	NO
240	1396	male	Iran Hea	Single	2.5	Rura	high	YES	NO	autum	24	pedistum	10	live	High sch	46	self emp	Mental d	YES	YES	YES	NO
241	1396	male	Not insu	Married	2	Urban	miled	YES	NO	autum	1	detergen	15	live	Primary	45	employee	Others	YES	NO	NO	NO
242	1396	male	Iran Hea	Single	4	Urban	high	YES	NO	autum	2	lorazpam	10	live	Diploma	34	non job	Failure	YES	NO	NO	NO
243	1396	male	Social S	Single	1.55	Urban	high	YES	NO	spring	3	lorazpam	8	live	Primary	35	non job	Failure	NO	YES	NO	NO
244	1396	male	Social S	Single	1	Urban	miled	NO	NO	summer	4	opium	5	live	High sch	36	employee	Addictio	NO	YES	NO	NO
245	1396	male	Iran Hea	Single	2.5	Rura	high	YES	NO	autum	5	pedistum	9	live	High sch	46	self emp	Economic	YES	YES	NO	NO
246	1396	male	Not insu	Married	2	Urban	miled	YES	NO	autum	6	opium	9	live	Primary	45	employee	Familial	YES	NO	NO	NO
247	1396	female	Not insu	Single	5	Rura	low	NO	NO	autum	7	methadon	9	live	High sch	48	non job	Economic	YES	YES	NO	NO
248	1396	male	Not insu	Widowed	4	Urban	low	YES	NO	winter	8	alminium	3	dead	High sch	49	non job	Familial	NO	NO	NO	NO
249	1396	male	Not insu	Divorced	7	Rura	low	YES	NO	winter	9	methadon	9	live	High sch	74	non job	Economic	NO	NO	NO	NO
250	1396	female	Not insu	Married	6	Rura	low	NO	NO	spring	10	TCA	6	dead	Primary	75	non job	Familial	NO	YES	NO	NO
251	1396	male	Iran Hea	Single	4	Rura	high	YES	NO	summer	11	lorazpam	10	live	Primary	65	employee	Familial	YES	NO	NO	NO
252	1396	male	Social S	Widowed	3	Rura	low	YES	NO	autum	12	heart	8	live	High sch	69	retired	Economic	YES	NO	NO	NO
253	1396	female	Social S	Divorced	2	Rura	miled	NO	NO	autum	13	lorazpam	5	live	Primary	56	retired	Familial	YES	YES	NO	NO
254	1396	male	Iran Hea	Single	1.5	Urban	low	YES	NO	autum	14	lorazpam	9	live	Diploma	68	retired	Familial	NO	NO	NO	NO
255	1396	male	Not insu	Widowed	0.5	Rura	low	YES	NO	winter	15	lorazpam	9	live	Primary	69	employee	Failure	YES	NO	NO	NO
256	1396	male	Not insu	Divorced	6	Rura	miled	YES	NO	winter	16	alchol	10	live	Diploma	20	employee	Falling	YES	NO	NO	NO
257	1396	female	Not insu	Widowed	3	Rura	miled	NO	NO	spring	17	heart	9	live	Primary	19	non job	Falling	YES	YES	NO	NO
258	1396	female	Not insu	Widowed	1	Rura	miled	NO	NO	spring	18	lorazpam	10	live	High sch	55	non job	Failure	NO	NO	NO	NO
259	1396	male	Not insu	Single	2	Urban	low	YES	NO	summer	19	lorazpam	9	live	Primary	54	employee	Mental d	YES	NO	YES	NO
260	1396	male	Not insu	Divorced	2.5	Rura	low	YES	NO	autum	20	alchol	7	live	High sch	43	employee	Economic	NO	NO	NO	NO
261	1396	female	Iran Hea	Married	2.5	Rura	low	NO	NO	autum	21	opium	10	live	Diploma	37	non job	Familial	NO	NO	YES	NO
262	1396	male	Social S	Married	2	Rura	high	YES	NO	autum	22	methadon	9	live	Diploma	39	non job	Familial	YES	NO	NO	NO
263	1396	male	Not insu	Married	3	Rura	low	YES	NO	winter	23	TCA	6	dead	Primary	54	employee	Economic	YES	NO	YES	NO
264	1396	male	Iran Hea	Single	3	Urban	low	YES	NO	spring	24	tramadol	10	live	High sch	45	self emp	Familial	YES	NO	NO	NO
265	1396	male	Iran Hea	Widowed	4	Rura	low	YES	NO	summer	1	alchol	8	live	Primary	46	self emp	Familial	YES	NO	NO	NO
266	1396	female	Not insu	Divorced	5	Rura	miled	NO	NO	autum	2	lorazpam	5	live	Primary	65	self emp	Failure	YES	YES	NO	NO
267	1396	male	Not insu	Single	2	Urban	low	YES	NO	autum	3	lorazpam	9	live	Primary	54	non job	Economic	YES	NO	YES	NO
268	1396	male	Not insu	Divorced	2.5	Rura	low	YES	NO	autum	4	alchol	9	live	High sch	43	employee	Familial	NO	NO	NO	NO
269	1396	female	Iran Hea	Married	2.5	Rura	low	NO	NO	spring	5	opium	10	live	Diploma	37	non job	Economic	NO	NO	NO	NO
270	1396	male	Social S	Married	2	Rura	high	YES	NO	summer	6	آمفت	9	live	Diploma	39	non job	Familial	YES	NO	NO	NO
271	1396	male	Not insu	Married	3	Rura	low	YES	NO	autum	7	TCA	6	dead	Primary	54	employee	Economic	YES	NO	NO	NO
272	1396	male	Iran Hea	Single	3	Urban	low	NO	NO	autum	8	tramadol	10	live	High sch	45	self emp	Familial	YES	NO	NO	NO
273	1396	male	Iran Hea	Widowed	4	Rura	low	YES	NO	autum	9	alchol	8	live	Primary	46	self emp	Familial	YES	NO	NO	NO
274	1396	female	Not insu	Divorced	5	Rura	miled	NO	NO	winter	10	heart	5	live	Primary	65	self emp	Failure	YES	YES	NO	NO
275	1396	female	Not insu	Single	3	Rura	low	NO	NO	winter	11	alchol	9	live	Primary	18	non job	Falling	YES	NO	NO	NO
276	1396	female	Not insu	Widowed	2.5	Rura	low	NO	NO	spring	12	methadon	9	live	Primary	55	self emp	Mental d	YES	NO	NO	NO
277	1396	male	Not insu	Single	2	Rura	low	YES	NO	summer	13	lorazpam	10	live	Primary	46	self emp	Failure	YES	NO	NO	NO
278	1396	male	Not insu	Single	2.5	Rura	low	YES	NO	autum	14	lorazpam	8	live	Primary	57	non job	Failure	YES	NO	NO	NO
279	1396	male	Not insu	Divorced	4	Rura	low	NO	NO	autum	15	heart	5	live	Primary	19	non job	Falling	NO	NO	NO	NO
280	1396	male	Iran Hea	Widowed	3	Urban	miled	NO	NO	autum	16	lorazpam	9	live	High sch	52	self emp	Economic	NO	NO	NO	NO
281	1396	male	Not insu	Married	3.5	Urban	low	YES	NO	winter	17	آمفت	9	live	High sch	48	non job	Familial	NO	NO	NO	NO
281	1396	male	Not insu	Married	2.5	Rura	low	YES	NO	winter	18	TCA	10	live	Diploma	46	non job	Familial	YES	NO	NO	NO
282	1396	male	Social S	Widowed	2	Rura	miled	YES	NO	spring	19	lorazpam	9	live	Diploma	60	employee	Economic	YES	NO	NO	NO
283	1396	male	Not insu	Divorced	1	Rura	low	YES	NO	spring	20	آمفت	10	live	Diploma	49	self emp	Familial	YES	NO	NO	NO
284	1396	male	Iran Hea	Divorced	1.5	Rura	low	YES	NO	summer	21	TCA	6	dead	High sch	50	self emp	Familial	YES	NO	NO	NO
285	1396	female	Not insu	Widowed	3	Urban	miled	NO	NO	autum	22	methadon	9	live	High sch	55	self emp	Familial	YES	NO	NO	NO
286	1396	male	Not insu	Widowed	3	Rura	low	YES	NO	autum	23	methadon	9	live	High sch	54	non job	Familial	YES	NO	NO	NO
287	1396	male	Not insu	Single	2	Rura	miled	NO	NO	autum	24	opium	10	live	High sch	51	self emp	Addictio	NO	NO	NO	NO
288	1396	male	General	Married	2	Rura	low	NO	NO	winter	1	lorazpam	8	live	High sch	52	self emp	Failure	YES	NO	NO	NO
289	1396	female	Not insu	Married	2.5	Urban	low	NO	NO	spring	2	methadon	9	live	High sch	57	non job	Economic	YES	YES	NO	NO
290	1396	male	Not insu	Single	2.5	Urban	miled	YES	NO	summer	3	tramadol	10	live	Primary	48	non job	Familial	YES	NO	NO	NO
291	1396	male	Others	Widowed	3	Rura	low	YES	NO	autum	4	آمفت	8	live	High sch	43	self emp	Economic	YES	NO	NO	NO
292	1396	female	Not insu	Single	3.5	Rura	miled	NO	NO	autum	5	TCA	6	dead	High sch	35	non job	Familial	NO	YES	NO	YES
293	1396	female	Not insu	Single	4	Rura	miled	NO	NO	autum	6	lorazpam	9	live	Primary	36	non job	Familial	YES	NO	NO	YES
294	1396	male	Iran Hea	Single	4	Urban	high	YES	NO	spring	7	lorazpam	9	live	Diploma	34	employee	Mental d	YES	NO	YES	NO
295	1396	male	Social S	Single	1.55	Urban	high	YES	NO	summer	8	heart	10	live	Primary	35	employee	Failure	NO	YES	NO	NO
296	1396	male	Social S	Single	1	Urban	miled	YES	NO	autum	9	opium	9	live	High sch	36	employee	Addictio	NO	YES	NO	NO
297	1396	male	Iran Hea	Single	2.5	Rura	high	YES	NO	autum	10	pedistum	10	live	High sch	46	self emp	Economic	YES	YES	NO	NO
298	1396	male	Not insu	Married	2	Urban	miled	YES	NO	autum	11	methadon	9	live	Primary	45	employee	Addictio	YES	NO	NO	NO
299	1396	female	Not insu	Single	3	Rura	low	NO	NO	winter	12	alchol	10	live	Primary	18	non job	Falling	YES	NO	NO	NO
300	1396	female	Not insu	Widowed	2.5	Rura	low	NO	NO	winter	13	lorazpam	8	live	Primary	55	employee	Failure	YES	NO	NO	NO
301	1396	male	Not insu	Single	2	Rura	low	YES	NO	spring	14	lorazpam	5	live	Primary	46	employee	Failure	YES	NO	NO	NO
302	1396	male	Not insu	Single	2.5	Rura	low	YES	NO	summer	15	methadon	9	live	Primary	57	non job	Failure	YES	NO	NO	NO
303	1396	male	Not insu	Divorced	4	Rura	low	YES	NO	autum	16	alchol	10	live	Primary	55	non job	Economic	NO	NO	NO	NO
304	1396	male	Iran Hea	Widowed	3	Urban	miled	YES	NO	autum	17	lorazpam	8	live	High sch	52	employee	Familial	NO	NO	NO	NO
305	1396	male	Not insu	Married	3.5	Urban	low	NO	NO	autum	18	آمفت	5	live	High sch	48	self emp	Economic	NO	NO	NO	NO
306	1396	male	Not insu	Married	2.5	Rura	low	NO	NO	winter	19	methadon	9	live	Diploma	46	self emp	Familial	YES	NO	NO	NO
307	1396	male	Social S	Widowed	2	Rura	miled	YES	NO	winter	20	lorazpam	10	live	Diploma	60	self emp	Familial	YES	NO	NO	NO
308	1396	male	General	Married	2	Rura	low	YES	NO	spring	21	lorazpam	8	live	High sch	52	non job	Failure	YES	NO	NO	NO
309	1396	female	Not insu	Married	2.5	Urban	low	NO	NO	spring	22	lorazpam	5	live	High sch	57	self emp	Failure	YES	YES	NO	NO
310	1396	male	Not insu	Single	2.5	Urban	miled	YES	NO	summer	23	heart	9	live	Primary	48	self emp	Economic	YES	NO	NO	NO
311	1396	male	Others	Widowed	3	Rura	low	YES	NO	autum	1	methadon	9	live	High sch	43	non job	Familial	YES	NO	NO	NO
312	1396	female	Not insu	Single	3.5	Rura	miled	NO	NO	autum	2	TCA	6	dead	High sch	35	non job	Familial	NO	YES	YES	NO
313	1396	female	Not insu	Single	4	Rura	miled	NO	NO	autum	3	lorazpam	9	live	Primary	36	self emp	Failure	YES	NO	NO	NO
314	1396	male	Iran Hea	Single	4	Urban	high	YES	NO	winter	4	lorazpam	10	live	Diploma	34	non job	Failure	YES	NO	NO	NO
315	1396	male	Social S	Single	1.55	Urban	high	YES	NO	spring	5	methadon	9	live	Primary	35	employee	Mental d	NO	YES	YES	NO
316	1396	male	Social S	Single	1	Urban	miled	YES	NO	summer	6	opium	10	live	High sch	36	employee	Addictio	NO	YES	NO	NO
317	1396	male	Iran Hea	Single	2.5	Rura	high	YES	NO	autum	7	pedistum	8	live	High sch	46	self emp	Economic	YES	YES	NO	NO
318	1396	male	Not insu	Married	2	Urban	miled	YES	NO	autum	8	methadon	9	live	Primary	45	employee	Addictio	YES	NO	NO	NO
319	1396	male	Iran Hea	Single	4	Urban	high	YES	NO	autum	9	lorazpam	10	live	Diploma	34	employee	Economic	YES	NO	NO	NO
320	1396	male	Social S	Single	1.55	Urban	high	NO	NO	spring	10	lorazpam	8	live	Primary	35	non job	Familial	NO	YES	NO	NO
321	1396	male	Social S	Single	1	Urban	miled	NO	NO	summer	11	opium	5	live	High sch	36	non job	Familial	NO	YES	NO	NO
322	1396	male	Iran Hea	Single	2.5	Rura	high	YES	NO	autum	12	methadon	9	live	High sch	46	employee	Economic	YES	YES	NO	NO
323	1396	male	Not insu	Married	2	Urban	miled	NO	NO	autum	13	opium	10	live	Primary	45	self emp	Addictio	YES	NO	NO	NO
324	1396	female	Not insu	Single	5	Rura	low	NO	NO	autum	14	آمفت	8	live	High sch	48	self emp	Economic	YES	YES	NO	NO
325	1396	male	Not insu	Widowed	4	Urban	low	YES	NO	winter	15	TCA	6	dead	High sch	49	self emp	Familial	NO	NO	NO	NO
326	1396	male	Not insu	Divorced	7	Rura	low	YES	NO	winter	16	methadon	9	live	High sch	74	non job	Familial	NO	NO	NO	NO
327	1396	female	Not insu	Married	6	Rura	low	NO	NO	spring	17	TCA	10	live	Primary	75	self emp	Economic	NO	YES	NO	NO
328	1396	male	Iran Hea	Single	4	Rura	high	YES	NO	summer	18	lorazpam	8	live	Primary	65	self emp	Familial	YES	NO	NO	NO
329	1396	male	Social S	Widowed	3	Rura	low	YES	NO	autum	19	heart	5	live	High sch	69	non job	Familial	YES	NO	NO	NO
330	1396	female	Social S	Divorced	2	Rura	miled	NO	NO	autum	20	lorazpam	9	live	Primary	56	non job	Mental d	YES	YES	YES	NO
331	1396	male	Iran Hea	Single	1.5	Urban	low	YES	NO	autum	21	lorazpam	9	live	Diploma	58	self emp	Economic	NO	NO	NO	NO
332	1396	male	Others	Widowed	3	Rura	low	NO	NO	winter	22	آمفت	10	live	High sch	43	non job	Familial	YES	NO	NO	NO
333	1396	female	Not insu	Single	3.5	Rura	miled	NO	NO	winter	23	TCA	6	dead	High sch	35	non job	Economic	NO	YES	NO	NO
334	1396	female	Not insu	Single	4	Rura	miled	NO	NO	spring	1	lorazpam	10	live	Primary	36	non job	Familial	YES	NO	NO	NO
335	1396	male	Iran Hea	Single	4	Urban	high	YES	NO	spring	2	lorazpam	8	live	Diploma	34	employee	Familial	YES	NO	NO	NO
336	1396	male	Social S	Single	1.55	Urban	high	YES	NO	summer	3	methadon	9	live	Primary	35	non job	Failure	NO	YES	NO	NO
337	1396	male	Social S	Single	1	Urban	miled	YES	NO	autum	4	opium	10	live	High sch	36	non job	Addictio	NO	YES	NO	NO
338	1396	male	Iran Hea	Single	2.5	Rura	high	NO	NO	autum	5	pedistum	8	live	High sch	46	employee	Economic	YES	YES	NO	NO
339	1396	male	Not insu	Married	2	Urban	miled	NO	NO	autum	6	opium	5	live	Primary	45	self emp	Familial	YES	NO	NO	NO
340	1396	female	Not insu	Single	3	Rura	low	NO	NO	winter	7	methadon	9	live	Primary	63	self emp	Familial	YES	NO	NO	NO
341	1396	female	Not insu	Widowed	2.5	Rura	low	NO	NO	spring	8	lorazpam	10	live	Primary	55	self emp	Failure	YES	NO	NO	NO
342	1396	male	Not insu	Single	2	Rura	low	YES	NO	summer	9	lorazpam	8	live	Primary	46	non job	Failure	YES	NO	NO	NO
343	1396	male	Not insu	Single	2.5	Rura	low	YES	NO	autum	10	methadon	9	live	Primary	57	self emp	Failure	YES	NO	NO	YES
344	1396	male	Not insu	Divorced	4	Rura	low	YES	NO	autum	11	alchol	10	live	Primary	19	self emp	Falling	NO	NO	NO	YES
345	1396	male	Iran Hea	Widowed	3	Urban	miled	YES	NO	autum	12	lorazpam	8	live	High sch	52	non job	Mental d	NO	NO	YES	NO
346	1396	male	Not insu	Married	3.5	Urban	low	NO	NO	spring	13	آمفت	5	live	High sch	67	non job	Economic	NO	NO	NO	YES
347	1396	male	Not insu	Married	2.5	Rura	low	NO	NO	summer	14	TCA	6	dead	Diploma	46	self emp	Familial	YES	NO	NO	NO
348	1396	male	Social S	Widowed	2	Rura	miled	YES	NO	autum	15	methadon	9	live	Diploma	60	non job	Familial	YES	NO	NO	NO
349	1396	male	Not insu	Divorced	1	Rura	low	YES	NO	autum	1	TCA	6	dead	Diploma	49	employee	Economic	YES	NO	NO	NO
350	1396	male	Iran Hea	Divorced	1.5	Rura	low	YES	NO	autum	2	methadon	9	live	High sch	50	self emp	Familial	YES	NO	NO	YES
351	1396	female	Not insu	Widowed	3	Urban	miled	NO	NO	winter	3	heart	8	live	High sch	80	non job	Familial	YES	NO	NO	NO
352	1396	male	Not insu	Widowed	3	Rura	low	YES	NO	winter	4	methadon	9	live	High sch	54	non job	Familial	YES	NO	NO	NO
353	1396	male	Not insu	Single	2	Rura	miled	YES	NO	spring	5	opium	10	live	High sch	51	non job	Addictio	NO	NO	NO	NO
354	1396	male	General	Married	2	Rura	low	YES	NO	summer	6	lorazpam	8	live	High sch	52	employee	Failure	YES	NO	NO	NO
355	1396	female	Not insu	Married	2.5	Urban	low	NO	NO	autum	7	lorazpam	5	live	High sch	57	self emp	Failure	YES	YES	NO	NO
356	1396	male	Not insu	Single	2.5	Urban	miled	YES	NO	autum	8	tramadol	9	live	Primary	67	self emp	Economic	YES	NO	NO	NO
357	1396	male	Others	Widowed	3	Rura	low	YES	NO	autum	9	آمفت	9	live	High sch	43	self emp	Familial	YES	NO	NO	NO
358	1396	female	Not insu	Single	3.5	Rura	miled	NO	NO	winter	10	methadon	9	live	High sch	35	non job	Economic	NO	YES	NO	NO
359	1396	female	Not insu	Single	4	Rura	miled	NO	NO	winter	11	lorazpam	9	live	Primary	45	self emp	Mental d	YES	NO	NO	NO
360	1396	male	Iran Hea	Single	4	Urban	high	YES	NO	spring	12	alminium	3	dead	Diploma	34	self emp	Familial	YES	NO	NO	NO
361	1396	male	Social S	Single	1.55	Urban	high	YES	NO	spring	13	lorazpam	9	live	Primary	55	non job	Failure	NO	YES	NO	NO
362	1396	male	Social S	Single	1	Urban	miled	YES	NO	summer	14	methadon	9	live	High sch	36	non job	Addictio	NO	YES	NO	NO
363	1396	male	Iran Hea	Single	2.5	Rura	high	YES	NO	autum	15	pedistum	7	live	High sch	46	self emp	Economic	YES	YES	NO	NO
364	1396	male	Not insu	Married	2	Urban	miled	YES	NO	autum	16	opium	7	live	Primary	57	non job	Addictio	YES	NO	NO	NO
365	1396	female	Not insu	Single	3	Rura	low	NO	NO	autum	1	TCA	6	dead	Primary	19	non job	Falling	YES	NO	NO	NO
366	1396	female	Not insu	Widowed	2.5	Rura	low	NO	NO	winter	2	alminium	10	dead	Primary	55	employee	Failure	YES	NO	NO	NO
367	1396	male	Not insu	Single	2	Rura	low	YES	NO	spring	3	heart	8	live	Primary	46	employee	Failure	YES	NO	NO	NO
368	1396	male	Not insu	Single	2.5	Rura	low	YES	NO	summer	4	lorazpam	5	live	Primary	71	employee	Failure	YES	NO	NO	NO
369	1396	male	Not insu	Divorced	4	Rura	low	YES	NO	autum	5	alchol	9	live	Primary	19	employee	Falling	NO	NO	NO	NO
370	1396	male	Iran Hea	Widowed	3	Urban	miled	YES	NO	autum	6	lorazpam	9	live	High sch	52	self emp	Failure	NO	NO	NO	NO
371	1396	male	Not insu	Married	3.5	Urban	low	YES	NO	autum	7	آمفت	10	live	High sch	48	non job	Economic	NO	NO	NO	NO
372	1396	male	Not insu	Married	2.5	Rura	low	YES	NO	spring	8	javel wa	9	live	Diploma	46	non job	Familial	YES	NO	NO	NO
373	1396	male	Social S	Widowed	2	Rura	miled	NO	NO	summer	9	lorazpam	10	live	Diploma	60	employee	Familial	YES	NO	NO	NO
374	1396	male	General	Married	2	Rura	low	NO	NO	autum	10	detergen	15	live	High sch	52	self emp	Others	YES	NO	NO	NO
375	1396	female	Not insu	Married	2.5	Urban	low	NO	NO	autum	11	lorazpam	10	live	High sch	57	self emp	Familial	YES	YES	NO	NO
376	1396	male	Not insu	Single	2.5	Urban	miled	YES	NO	autum	12	javel wa	8	live	Primary	48	self emp	Familial	YES	NO	NO	NO
377	1396	male	Others	Widowed	3	Rura	low	YES	NO	winter	13	آمفت	5	live	High sch	43	non job	Economic	YES	NO	NO	NO
378	1396	female	Not insu	Single	3.5	Rura	miled	NO	NO	winter	14	javel wa	9	live	High sch	67	self emp	Familial	NO	YES	NO	NO
379	1396	female	Not insu	Single	4	Rura	miled	NO	NO	spring	15	TCA	6	dead	Primary	89	self emp	Failure	YES	NO	NO	NO
380	1396	male	Iran Hea	Single	4	Urban	high	YES	NO	summer	16	lorazpam	10	live	Diploma	34	non job	Mental d	YES	NO	YES	NO
381	1396	male	Social S	Single	1.55	Urban	high	YES	NO	autum	17	lorazpam	8	live	Primary	45	non job	Failure	NO	YES	NO	NO
382	1396	male	Social S	Single	1	Urban	miled	YES	NO	autum	18	opium	5	live	High sch	56	self emp	Addictio	NO	YES	NO	NO
383	1396	male	Iran Hea	Single	2.5	Rura	high	NO	NO	autum	19	heart	9	live	High sch	46	non job	Economic	YES	YES	NO	NO
384	1396	male	Not insu	Married	2	Urban	miled	NO	NO	winter	20	opium	9	live	Primary	45	employee	Addictio	YES	NO	NO	NO
385	1396	male	Iran Hea	Single	4	Urban	high	YES	NO	winter	21	lorazpam	10	live	Diploma	34	employee	Failure	YES	NO	NO	NO
386	1396	male	Social S	Single	1.55	Urban	high	YES	NO	spring	22	lorazpam	9	live	Primary	35	non job	Failure	NO	YES	NO	YES
387	1396	male	Social S	Single	1	Urban	miled	YES	NO	spring	23	opium	10	live	High sch	36	non job	Addictio	NO	YES	NO	NO
388	1396	male	Iran Hea	Single	2.5	Rura	high	YES	NO	summer	24	pedistum	9	live	High sch	46	employee	Economic	YES	YES	NO	NO
389	1396	male	Not insu	Married	2	Urban	miled	YES	NO	autum	1	opium	7	live	Primary	45	self emp	Economic	YES	NO	NO	NO
390	1396	female	Not insu	Single	5	Rura	low	NO	NO	autum	2	javel wa	10	live	High sch	48	self emp	Familial	YES	YES	NO	NO
391	1396	male	Not insu	Widowed	4	Urban	low	YES	NO	autum	3	TCA	6	dead	High sch	49	self emp	Economic	NO	NO	NO	NO
392	1396	male	Not insu	Divorced	7	Rura	low	YES	NO	winter	4	alminium	3	dead	High sch	74	non job	Familial	NO	NO	NO	NO
393	1396	female	Not insu	Married	6	Rura	low	NO	NO	spring	5	TCA	6	live	Primary	75	self emp	Familial	NO	YES	NO	NO
394	1396	male	Iran Hea	Single	4	Rura	high	YES	NO	summer	6	lorazpam	10	live	Primary	65	self emp	Failure	YES	NO	NO	NO
395	1396	male	Social S	Widowed	3	Rura	low	YES	NO	autum	7	lorazpam	8	live	High sch	69	non job	Failure	YES	NO	NO	NO
396	1396	female	Social S	Divorced	2	Rura	miled	NO	NO	autum	8	alminium	3	dead	Primary	56	non job	Mental d	YES	YES	YES	NO
397	1396	male	Iran Hea	Single	1.5	Urban	low	YES	NO	autum	9	lorazpam	10	live	Diploma	58	self emp	Failure	NO	NO	NO	NO
398	1396	male	Not insu	Widowed	0.5	Rura	low	NO	NO	spring	10	lorazpam	8	live	Primary	69	employee	Failure	YES	NO	NO	NO
399	1396	male	Not insu	Divorced	6	Rura	miled	NO	NO	summer	11	heart	5	live	Diploma	18	non job	Falling	YES	NO	NO	NO
400	1396	female	Not insu	Widowed	3	Rura	miled	NO	NO	autum	12	alchol	9	live	Primary	19	non job	Falling	YES	YES	NO	NO
401	1396	female	Not insu	Widowed	1	Rura	miled	NO	NO	autum	13	lorazpam	9	live	High sch	55	employee	Economic	NO	NO	NO	NO
402	1396	male	Not insu	Single	2	Urban	low	YES	NO	autum	14	lorazpam	10	live	Primary	54	self emp	Familial	YES	NO	YES	NO
403	1396	male	Not insu	Divorced	2.5	Rura	low	YES	NO	winter	15	javel wa	9	live	High sch	43	self emp	Familial	NO	NO	NO	NO
404	1396	female	Iran Hea	Married	2.5	Rura	low	NO	NO	winter	16	opium	10	live	Diploma	37	self emp	Economic	NO	NO	NO	NO
405	1396	male	Social S	Married	2	Rura	high	YES	NO	spring	17	alminium	9	dead	Diploma	39	non job	Familial	YES	NO	NO	NO
406	1396	male	Not insu	Married	3	Rura	low	YES	NO	summer	18	javel wa	7	live	Primary	54	self emp	Familial	YES	NO	YES	NO
407	1396	male	Iran Hea	Single	3	Urban	low	NO	NO	autum	19	tramadol	10	live	High sch	45	self emp	Familial	YES	NO	NO	NO
408	1396	male	Iran Hea	Widowed	4	Rura	low	NO	NO	autum	20	alchol	9	live	Primary	46	non job	Familial	YES	NO	YES	NO
409	1396	female	Not insu	Divorced	5	Rura	miled	NO	NO	autum	21	lorazpam	10	live	Primary	65	non job	Failure	YES	YES	NO	NO
410	1396	male	Not insu	Single	2	Urban	low	YES	NO	winter	22	detergen	15	live	Primary	54	self emp	Mental d	YES	NO	YES	NO
411	1396	male	Not insu	Divorced	2.5	Rura	low	YES	NO	winter	23	alchol	10	live	High sch	18	non job	Falling	NO	NO	NO	NO
412	1396	female	Iran Hea	Married	2.5	Rura	low	NO	NO	spring	24	opium	8	live	Diploma	37	self emp	Economic	NO	NO	YES	NO
413	1396	male	Social S	Married	2	Rura	high	YES	NO	spring	1	alminium	5	dead	Diploma	39	self emp	Familial	YES	NO	NO	NO
414	1396	male	Not insu	Married	3	Rura	low	YES	NO	summer	2	TCA	6	live	Primary	54	employee	Economic	YES	NO	NO	NO
415	1396	male	Iran Hea	Single	3	Urban	low	YES	NO	autum	3	alminium	3	dead	High sch	45	self emp	Familial	YES	NO	NO	NO
416	1396	male	Iran Hea	Widowed	4	Rura	low	YES	NO	autum	4	heart	10	live	Primary	46	non job	Familial	YES	NO	NO	NO
417	1396	female	Not insu	Divorced	5	Rura	miled	NO	NO	autum	5	lorazpam	8	live	Primary	65	non job	Failure	YES	YES	NO	YES
418	1396	female	Not insu	Single	3	Rura	low	NO	NO	winter	6	alchol	5	live	Primary	18	employee	Falling	YES	NO	NO	NO
419	1396	female	Not insu	Widowed	2.5	Rura	low	NO	NO	spring	7	lorazpam	9	live	Primary	55	self emp	Failure	YES	NO	NO	NO
420	1396	male	Not insu	Single	2	Rura	low	YES	NO	summer	8	lorazpam	9	live	Primary	46	self emp	Failure	YES	NO	NO	NO
421	1396	male	Not insu	Single	2.5	Rura	low	YES	NO	autum	9	lorazpam	10	live	Primary	57	self emp	Failure	YES	NO	NO	NO
422	1396	male	Not insu	Divorced	4	Rura	low	NO	NO	autum	10	alchol	9	live	Primary	19	non job	Falling	NO	NO	NO	NO
423	1396	male	Iran Hea	Widowed	3	Urban	miled	NO	NO	autum	11	lorazpam	10	live	High sch	52	self emp	Economic	NO	NO	NO	NO
424	1396	male	Not insu	Married	3.5	Urban	low	YES	NO	spring	12	javel wa	9	live	High sch	48	self emp	Familial	NO	NO	NO	NO
425	1396	male	Not insu	Married	2.5	Rura	low	YES	NO	summer	13	TCA	6	dead	Diploma	46	non job	Familial	YES	NO	NO	NO
426	1396	male	Social S	Widowed	2	Rura	miled	NO	NO	autum	14	lorazpam	7	live	Diploma	60	non job	Economic	YES	NO	NO	NO
427	1396	male	Not insu	Divorced	1	Rura	low	NO	NO	autum	15	detergen	15	live	Diploma	49	self emp	Mental d	YES	NO	YES	NO
428	1396	male	Iran Hea	Divorced	1.5	Rura	low	YES	NO	autum	16	javel wa	15	live	High sch	50	self emp	Others	YES	NO	NO	NO
429	1396	female	Not insu	Widowed	3	Urban	miled	NO	NO	winter	17	methadon	9	live	High sch	55	non job	Familial	YES	NO	NO	NO
430	1396	male	Not insu	Widowed	3	Rura	low	YES	NO	winter	18	methadon	9	live	High sch	54	non job	Familial	YES	NO	NO	NO
431	1396	male	Not insu	Single	2	Rura	miled	YES	NO	spring	19	opium	10	live	High sch	51	employee	Addictio	NO	NO	NO	NO
432	1396	male	General	Married	2	Rura	low	YES	NO	summer	20	lorazpam	8	live	High sch	52	self emp	Failure	YES	NO	NO	NO
433	1396	female	Not insu	Married	2.5	Urban	low	NO	NO	autum	21	heart	5	live	High sch	57	self emp	Economic	YES	YES	NO	YES
434	1396	male	Not insu	Single	2.5	Urban	miled	YES	NO	autum	22	tramadol	9	live	Primary	48	self emp	Familial	YES	NO	NO	NO
435	1396	male	Others	Widowed	3	Rura	low	YES	NO	autum	23	آمفت	9	live	High sch	43	non job	Economic	YES	NO	NO	NO
436	1396	female	Not insu	Single	3.5	Rura	miled	NO	NO	winter	24	TCA	6	dead	High sch	35	self emp	Familial	NO	YES	NO	YES
437	1396	female	Not insu	Single	4	Rura	miled	NO	NO	winter	1	lorazpam	10	live	Primary	36	self emp	Familial	YES	NO	NO	YES
438	1396	male	Iran Hea	Single	4	Urban	high	YES	NO	spring	2	lorazpam	8	live	Diploma	34	non job	Failure	YES	NO	NO	NO
439	1396	male	Social S	Single	1.55	Urban	high	YES	NO	winter	3	lorazpam	5	live	Primary	35	non job	Failure	NO	YES	NO	YES
440	1396	male	Social S	Single	1	Urban	miled	NO	NO	spring	4	alminium	3	dead	High sch	36	self emp	Addictio	NO	YES	NO	NO
441	1396	male	Iran Hea	Single	2.5	Rura	high	NO	NO	summer	5	pedistum	10	live	High sch	46	self emp	Economic	YES	YES	NO	NO
442	1396	male	Not insu	Married	2	Urban	miled	YES	NO	autum	6	opium	8	live	Primary	45	non job	Addictio	YES	NO	NO	NO
443	1396	female	Not insu	Single	3	Rura	low	NO	NO	autum	7	alchol	5	live	Primary	19	non job	Falling	YES	NO	NO	NO
444	1396	female	Not insu	Widowed	2.5	Rura	low	NO	NO	autum	8	lorazpam	9	live	Primary	55	employee	Failure	YES	NO	NO	NO
445	1396	male	Not insu	Single	2	Rura	low	YES	NO	spring	9	alminium	3	dead	Primary	46	self emp	Failure	YES	NO	NO	NO
446	1396	male	Not insu	Single	2.5	Rura	low	YES	NO	summer	10	lorazpam	10	live	Primary	57	self emp	Mental d	YES	NO	YES	NO
447	1396	male	Not insu	Divorced	4	Rura	low	YES	NO	autum	11	alchol	8	live	Primary	19	non job	Falling	NO	NO	NO	NO
448	1396	male	Iran Hea	Widowed	3	Urban	miled	YES	NO	autum	12	heart	5	live	High sch	52	non job	Economic	NO	NO	NO	NO
449	1396	male	Not insu	Married	3.5	Urban	low	YES	NO	autum	13	alminium	3	dead	High sch	48	employee	Familial	NO	NO	NO	NO
450	1396	male	Not insu	Married	2.5	Rura	low	NO	NO	winter	14	TCA	6	live	Diploma	46	self emp	Familial	YES	NO	NO	NO
451	1396	male	Social S	Widowed	2	Rura	miled	NO	NO	winter	15	lorazpam	10	live	Diploma	60	self emp	Failure	YES	NO	NO	NO
452	1396	male	General	Married	2	Rura	low	YES	NO	spring	16	lorazpam	8	live	High sch	52	self emp	Economic	YES	NO	NO	NO
453	1396	female	Not insu	Married	2.5	Urban	low	NO	NO	summer	17	lorazpam	5	live	High sch	57	non job	Familial	YES	YES	NO	NO
454	1396	male	Not insu	Single	2.5	Urban	miled	YES	NO	autum	18	javel wa	15	live	Primary	48	self emp	Others	YES	NO	NO	NO
455	1396	male	Others	Widowed	3	Rura	low	YES	NO	autum	19	آمفت	7	live	High sch	43	self emp	Familial	YES	NO	NO	NO
456	1396	female	Not insu	Single	3.5	Rura	miled	NO	NO	autum	20	detergen	6	dead	High sch	35	non job	Others	NO	YES	YES	NO
457	1396	female	Not insu	Single	4	Rura	miled	NO	NO	winter	21	lorazpam	10	live	Primary	36	non job	Failure	YES	NO	NO	NO
458	1396	male	Iran Hea	Single	4	Urban	high	YES	NO	winter	22	lorazpam	8	live	Diploma	34	non job	Failure	YES	NO	NO	NO
459	1396	male	Social S	Single	1.55	Urban	high	YES	NO	spring	23	lorazpam	5	live	Primary	35	employee	Failure	NO	YES	NO	YES
460	1396	male	Social S	Single	1	Urban	miled	YES	NO	spring	24	opium	9	live	High sch	36	self emp	Addictio	NO	YES	NO	NO
461	1396	male	Iran Hea	Single	2.5	Rura	high	YES	NO	summer	1	pedistum	9	live	High sch	46	self emp	Economic	YES	YES	NO	NO
462	1396	male	Not insu	Married	2	Urban	miled	YES	NO	autum	2	opium	10	live	Primary	45	self emp	Addictio	YES	NO	NO	NO
463	1396	male	Iran Hea	Single	4	Urban	high	YES	NO	autum	3	lorazpam	9	live	Diploma	34	non job	Failure	YES	NO	NO	NO
464	1396	male	Social S	Single	1.55	Urban	high	YES	NO	autum	4	lorazpam	10	live	Primary	35	self emp	Mental d	NO	YES	YES	NO
465	1396	male	Social S	Single	1	Urban	miled	YES	NO	winter	5	opium	9	live	High sch	36	self emp	Addictio	NO	YES	NO	NO
466	1396	male	Iran Hea	Single	2.5	Rura	high	YES	NO	spring	6	javel wa	15	live	High sch	46	non job	Others	YES	YES	NO	NO
467	1396	male	Not insu	Married	2	Urban	miled	YES	NO	summer	7	opium	10	live	Primary	45	non job	Economic	YES	NO	NO	NO
468	1396	female	Not insu	Single	5	Rura	low	NO	NO	autum	8	heart	8	live	High sch	48	non job	Familial	YES	YES	NO	NO
469	1396	male	Not insu	Widowed	4	Urban	low	NO	NO	autum	9	javel wa	15	live	High sch	49	employee	Others	NO	NO	NO	NO
470	1396	male	Not insu	Divorced	7	Rura	low	NO	NO	autum	10	آمفت	9	live	High sch	74	retired	Familial	NO	NO	NO	NO
471	1396	female	Not insu	Married	6	Rura	low	NO	NO	spring	11	TCA	6	dead	Primary	75	non job	Familial	NO	YES	NO	NO
472	1396	male	Iran Hea	Single	4	Rura	high	YES	NO	summer	12	lorazpam	12	live	Primary	65	employee	Failure	YES	NO	NO	NO
473	1396	male	Social S	Widowed	3	Rura	low	YES	NO	autum	13	lorazpam	11	live	High sch	69	retired	Failure	YES	NO	NO	NO
474	1396	female	Social S	Divorced	2	Rura	miled	NO	NO	autum	14	javel wa	15	live	Primary	56	retired	Others	YES	YES	NO	NO
475	1396	male	Iran Hea	Single	1.5	Urban	low	YES	NO	autum	15	lorazpam	9	live	Diploma	58	non job	Failure	NO	NO	YES	NO
476	1396	male	Iran Hea	Single	4	Urban	high	YES	NO	winter	16	lorazpam	10	live	Diploma	34	non job	Failure	YES	NO	NO	NO
477	1396	male	Social S	Single	1.55	Urban	high	YES	NO	winter	17	javel wa	15	live	Primary	35	non job	Others	NO	YES	NO	YES
478	1396	male	Social S	Single	1	Urban	miled	YES	NO	spring	18	opium	10	live	High sch	36	employee	Mental d	NO	YES	NO	NO
479	1396	male	Iran Hea	Single	2.5	Rura	high	YES	NO	summer	19	pedistum	8	live	High sch	46	self emp	Economic	YES	YES	NO	NO
480	1396	male	Not insu	Married	2	Urban	miled	YES	NO	autum	20	opium	5	live	Primary	45	self emp	Economic	YES	NO	NO	NO
481	1396	female	Not insu	Single	5	Rura	low	NO	NO	autum	21	آمفت	9	live	High sch	48	non job	Familial	YES	YES	NO	NO
482	1396	male	Not insu	Widowed	4	Urban	low	NO	NO	autum	22	TCA	6	dead	High sch	49	employee	Economic	NO	NO	NO	NO
483	1396	male	Not insu	Divorced	7	Rura	low	NO	NO	winter	23	آمفت	9	live	High sch	74	non job	Familial	NO	NO	NO	NO
484	1396	female	Not insu	Married	6	Rura	low	NO	NO	winter	24	TCA	6	live	Primary	75	non job	Familial	NO	YES	NO	NO
485	1396	male	Iran Hea	Single	4	Rura	high	YES	NO	spring	1	lorazpam	10	live	Primary	65	employee	Failure	YES	NO	NO	NO
486	1396	male	Social S	Widowed	3	Rura	low	YES	NO	winter	2	lorazpam	8	live	High sch	69	self emp	Failure	YES	NO	YES	NO
487	1396	female	Social S	Divorced	2	Rura	miled	NO	NO	spring	3	lorazpam	5	live	Primary	56	self emp	Failure	YES	YES	YES	NO
488	1396	male	Iran Hea	Single	1.5	Urban	low	YES	NO	summer	4	lorazpam	9	live	Diploma	58	self emp	Failure	NO	NO	YES	NO
489	1396	male	Not insu	Widowed	0.5	Rura	low	YES	NO	autum	5	heart	9	live	Primary	69	non job	Failure	YES	NO	NO	NO
490	1396	male	Not insu	Divorced	6	Rura	miled	YES	NO	autum	6	alchol	10	live	Diploma	19	employee	Falling	YES	NO	NO	NO
491	1396	female	Not insu	Widowed	3	Rura	miled	NO	NO	autum	7	alminium	3	dead	Primary	18	non job	Falling	YES	YES	NO	NO
492	1396	female	Not insu	Widowed	1	Rura	miled	NO	NO	spring	8	lorazpam	10	live	High sch	55	non job	Failure	NO	NO	NO	NO
493	1396	male	Not insu	Single	2	Urban	low	YES	NO	summer	9	lorazpam	8	live	Primary	54	employee	Economic	YES	NO	YES	YES
494	1396	male	Not insu	Divorced	2.5	Rura	low	YES	NO	autum	10	alchol	5	live	High sch	56	employee	Familial	NO	NO	NO	NO
495	1396	female	Iran Hea	Married	2.5	Rura	low	NO	NO	autum	11	opium	9	live	Diploma	37	self emp	Economic	NO	NO	NO	NO
496	1396	male	Social S	Married	2	Rura	high	YES	NO	autum	12	آمفت	9	live	Diploma	63	self emp	Familial	YES	NO	NO	NO
497	1396	male	Not insu	Married	3	Rura	low	YES	NO	winter	13	javel wa	15	live	Primary	54	employee	Others	YES	NO	YES	NO
498	1396	male	Iran Hea	Single	3	Urban	low	NO	NO	winter	14	tramadol	10	live	High sch	45	self emp	Familial	YES	NO	NO	NO
499	1396	male	Iran Hea	Widowed	4	Rura	low	NO	NO	spring	15	alchol	8	live	Primary	46	non job	Mental d	YES	NO	YES	NO
500	1396	female	Not insu	Divorced	5	Rura	miled	NO	NO	summer	16	heart	5	live	Primary	65	non job	Failure	YES	YES	NO	NO
501	1396	male	Not insu	Single	2	Urban	low	YES	NO	autum	17	lorazpam	9	live	Primary	54	employee	Failure	YES	NO	NO	NO
502	1396	male	Not insu	Divorced	2.5	Rura	low	YES	NO	autum	18	alchol	9	live	High sch	43	self emp	Economic	NO	NO	NO	NO
503	1396	female	Iran Hea	Married	2.5	Rura	low	NO	NO	autum	19	opium	10	live	Diploma	57	self emp	Familial	NO	NO	YES	NO
504	1396	male	Social S	Married	2	Rura	high	YES	NO	winter	20	آمفت	9	live	Diploma	39	self emp	Familial	YES	NO	NO	NO
505	1396	male	Not insu	Married	3	Rura	low	YES	NO	winter	21	javel wa	15	live	Primary	54	employee	Others	YES	NO	NO	NO
506	1396	male	Iran Hea	Single	3	Urban	low	YES	NO	spring	22	tramadol	10	live	High sch	45	self emp	Familial	YES	NO	NO	NO
507	1396	male	Iran Hea	Widowed	4	Rura	low	YES	NO	spring	23	alchol	8	live	Primary	46	self emp	Familial	YES	NO	NO	NO
508	1396	female	Not insu	Divorced	5	Rura	miled	NO	NO	summer	24	lorazpam	5	live	Primary	65	non job	Failure	YES	YES	NO	YES
509	1396	male	Not insu	Single	2.5	Rura	low	YES	NO	autum	1	lorazpam	9	live	Primary	57	employee	Failure	YES	NO	NO	YES
510	1396	male	Not insu	Divorced	4	Rura	low	YES	NO	autum	2	alchol	9	live	Primary	18	employee	Falling	NO	NO	NO	YES
511	1396	male	Iran Hea	Widowed	3	Urban	miled	YES	NO	autum	3	heart	10	live	High sch	52	non job	Failure	NO	NO	NO	NO
512	1396	male	Not insu	Married	3.5	Urban	low	YES	NO	winter	4	آمفت	9	live	High sch	48	non job	Economic	NO	NO	NO	NO
513	1396	male	Not insu	Married	2.5	Rura	low	YES	NO	spring	5	TCA	6	live	Diploma	46	employee	Mental d	YES	NO	NO	NO
514	1396	male	Social S	Widowed	2	Rura	miled	NO	NO	summer	6	lorazpam	10	live	Diploma	60	self emp	Economic	YES	NO	NO	NO
515	1396	male	Not insu	Divorced	1	Rura	low	NO	NO	autum	7	آمفت	8	live	Diploma	49	self emp	Familial	YES	NO	NO	NO
516	1396	male	Iran Hea	Divorced	1.5	Rura	low	YES	NO	autum	8	javel wa	15	live	High sch	50	self emp	Others	YES	NO	NO	NO
517	1396	female	Not insu	Widowed	3	Urban	miled	NO	NO	autum	9	methadon	9	live	High sch	55	non job	Familial	YES	NO	NO	NO
518	1396	male	Not insu	Widowed	3	Rura	low	YES	NO	spring	10	methadon	10	live	High sch	54	employee	Familial	YES	NO	NO	NO
519	1396	male	Not insu	Single	2	Rura	miled	YES	NO	summer	11	opium	10	live	High sch	51	employee	Addictio	NO	NO	NO	NO
520	1396	male	General	Married	2	Rura	low	YES	NO	autum	12	lorazpam	8	live	High sch	52	employee	Failure	YES	NO	NO	NO
521	1396	female	Not insu	Married	2.5	Urban	low	NO	NO	autum	13	lorazpam	5	live	High sch	57	non job	Economic	YES	YES	NO	NO
522	1396	male	Not insu	Single	2.5	Urban	miled	YES	NO	autum	14	alminium	3	dead	Primary	48	employee	Familial	YES	NO	NO	NO
523	1396	male	Others	Widowed	3	Rura	low	YES	NO	winter	15	آمفت	10	live	High sch	43	self emp	Economic	YES	NO	NO	NO
524	1396	female	Not insu	Single	3.5	Rura	miled	NO	NO	winter	16	TCA	6	live	High sch	35	non job	Familial	NO	YES	NO	NO
525	1396	female	Not insu	Single	4	Rura	miled	NO	NO	spring	17	alminium	3	dead	Primary	36	non job	Familial	YES	NO	NO	NO
526	1396	male	Iran Hea	Single	4	Urban	high	YES	NO	summer	18	lorazpam	10	live	Diploma	34	non job	Failure	YES	NO	NO	NO
527	1396	male	Social S	Single	1.55	Urban	high	YES	NO	autum	19	heart	8	live	Primary	35	employee	Failure	NO	YES	NO	YES
528	1396	male	Social S	Single	1	Urban	miled	YES	NO	autum	20	javel wa	15	live	High sch	36	self emp	Others	NO	YES	NO	NO
529	1396	male	Iran Hea	Single	2.5	Rura	high	NO	NO	autum	21	pedistum	10	live	High sch	46	self emp	Economic	YES	YES	NO	NO
530	1396	male	Not insu	Married	2	Urban	miled	NO	NO	winter	22	opium	8	live	Primary	45	employee	Mental d	YES	NO	YES	NO
531	1396	female	Not insu	Single	3	Rura	low	NO	NO	winter	23	alchol	5	live	Primary	18	non job	Falling	YES	NO	NO	NO
532	1396	female	Not insu	Widowed	2.5	Rura	low	NO	NO	spring	24	lorazpam	9	live	Primary	55	non job	Failure	YES	NO	NO	NO
533	1396	male	Not insu	Single	2	Rura	low	YES	NO	spring	1	lorazpam	9	live	Primary	46	employee	Failure	YES	NO	NO	NO
534	1396	male	Not insu	Single	2.5	Rura	low	YES	NO	summer	2	lorazpam	10	live	Primary	57	self emp	Economic	YES	NO	NO	NO
535	1396	male	Not insu	Married	3.5	Urban	low	YES	NO	autum	3	آمفت	9	live	High sch	48	self emp	Familial	NO	NO	NO	NO
536	1396	male	Not insu	Married	2.5	Rura	low	YES	NO	autum	4	TCA	6	live	Diploma	46	self emp	Familial	YES	NO	NO	NO
537	1396	male	Social S	Widowed	2	Rura	miled	YES	NO	autum	5	lorazpam	9	live	Diploma	60	non job	Failure	YES	NO	NO	NO
538	1396	male	General	Married	2	Rura	low	YES	NO	winter	6	lorazpam	11	live	High sch	52	self emp	Failure	YES	NO	NO	NO
539	1396	female	Not insu	Married	2.5	Urban	low	NO	NO	spring	7	javel wa	15	live	High sch	57	self emp	Others	YES	YES	NO	YES
540	1396	male	Not insu	Single	2.5	Urban	miled	YES	NO	summer	8	tramadol	10	live	Primary	48	employee	Familial	YES	NO	NO	NO
541	1396	male	Others	Widowed	3	Rura	low	YES	NO	autum	9	آمفت	8	live	High sch	43	self emp	Economic	YES	NO	NO	NO
542	1396	female	Not insu	Single	3.5	Rura	miled	NO	NO	autum	10	alminium	3	dead	High sch	35	non job	Mental d	NO	YES	NO	NO
543	1396	female	Not insu	Single	4	Rura	miled	NO	NO	autum	11	lorazpam	10	live	Primary	36	non job	Familial	YES	NO	NO	NO
544	1396	male	Iran Hea	Single	4	Urban	high	YES	NO	spring	12	heart	8	live	Diploma	34	non job	Failure	YES	NO	NO	NO
545	1396	male	Social S	Single	1.55	Urban	high	NO	NO	summer	13	lorazpam	5	live	Primary	35	non job	Failure	NO	YES	NO	NO
546	1396	male	Social S	Single	1	Urban	miled	NO	NO	autum	14	opium	9	live	High sch	36	employee	Addictio	NO	YES	NO	NO
547	1396	male	Iran Hea	Single	2.5	Rura	high	YES	NO	autum	15	pedistum	9	live	High sch	46	self emp	Economic	YES	YES	NO	NO
548	1396	male	Not insu	Married	2	Urban	miled	YES	NO	autum	16	opium	10	live	Primary	45	employee	Addictio	YES	NO	NO	NO
549	1396	female	Not insu	Single	3	Rura	low	NO	NO	winter	17	alchol	9	live	Primary	19	non job	Falling	YES	NO	NO	NO
550	1396	female	Not insu	Married	5	Rura	low	NO	NO	winter	18	lorazpam	10	live	Primary	74	non job	Failure	YES	YES	NO	NO
551	1396	male	Not insu	Married	6	Rura	low	YES	NO	spring	19	lorazpam	9	live	Primary	55	non job	Failure	YES	NO	NO	NO
552	1396	male	Iran Hea	Married	4	Rura	low	YES	NO	summer	20	javel wa	15	live	Diploma	65	employee	Others	YES	NO	NO	NO
553	1396	female	Not insu	Single	4	Rura	low	NO	NO	autum	21	alminium	10	live	High sch	65	self emp	Mental d	YES	YES	NO	NO
554	1396	male	Not insu	Married	5	Rura	low	YES	NO	autum	22	lorazpam	8	live	Primary	56	self emp	Failure	YES	NO	NO	NO
555	1396	male	Social S	Married	6	Rura	low	YES	NO	autum	23	alminium	5	live	Primary	55	self emp	Mental d	YES	NO	NO	NO
556	1396	male	Social S	Married	4	Urban	low	YES	NO	winter	24	heart	9	live	Primary	54	retired	Unemploy	YES	NO	NO	NO
557	1396	male	Iran Hea	Single	5	Rura	miled	YES	NO	winter	1	acetamin	9	live	High sch	54	non job	Unemploy	NO	NO	NO	NO
558	1396	male	Not insu	Widowed	6	Rura	low	YES	NO	spring	2	acetamin	10	live	Primary	57	non job	Unemploy	YES	NO	NO	NO
559	1396	female	Not insu	Married	4	Rura	low	NO	NO	spring	3	acetamin	9	live	High sch	552	employee	Mental d	YES	YES	YES	NO
560	1397	male	General	Married	4	Urban	low	YES	NO	summer	4	detergen	15	live	Diploma	50	self emp	Others	YES	NO	NO	NO
561	1397	female	Not insu	Widowed	5	Rura	low	NO	NO	autum	5	alminium	4	live	Primary	56	non job	Mental d	YES	NO	NO	NO
562	1397	male	Social S	Married	6	Rura	high	YES	NO	autum	6	javel wa	15	live	Primary	55	self emp	Others	YES	NO	NO	NO
563	1397	male	Social S	Widowed	7	Rura	low	NO	NO	autum	7	acetamin	10	live	BSc	54	self emp	Unemploy	NO	NO	NO	NO
564	1397	male	Not insu	Married	10	Rura	low	NO	NO	winter	8	heart	8	live	High sch	24	employee	Unemploy	YES	NO	NO	NO
565	1397	female	General	Divorced	9	Urban	low	NO	NO	spring	9	alminium	6	live	Diploma	59	non job	Mental d	YES	NO	YES	NO
566	1397	male	Not insu	Married	8	Urban	low	YES	NO	summer	10	acetamin	6	live	Primary	23	employee	Unemploy	YES	NO	NO	NO
567	1397	female	Not insu	Married	7	Urban	low	NO	NO	autum	11	javel wa	15	live	Diploma	61	non job	Others	NO	NO	NO	NO
568	1397	female	Not insu	Married	6	Rura	miled	NO	NO	autum	12	آمفت	9	live	Primary	62	employee	Familial	YES	NO	NO	NO
569	1397	male	Social S	Single	5	Rura	low	YES	NO	autum	13	TCA	6	live	High sch	63	self emp	Economic	NO	NO	NO	NO
570	1397	female	Not insu	Married	4	Rura	low	NO	NO	spring	14	lorazpam	8	live	High sch	64	non job	Familial	YES	NO	NO	NO
571	1397	male	Not insu	Married	3	Rura	low	YES	NO	summer	15	alminium	3	dead	Primary	45	employee	Mental d	YES	NO	YES	NO
572	1397	female	Not insu	Married	2	Rura	low	NO	NO	autum	16	alminium	10	live	BSc	43	non job	Mental d	YES	YES	YES	NO
573	1397	male	Not insu	Married	1	Rura	miled	YES	NO	autum	17	alminium	8	live	Diploma	46	employee	Economic	YES	NO	NO	NO
574	1397	female	Not insu	Married	3	Urban	high	NO	NO	autum	18	javel wa	15	live	Primary	49	non job	Others	YES	YES	NO	NO
575	1397	male	Iran Hea	Divorced	3	Rura	high	YES	NO	winter	19	alminium	10	live	Primary	55	employee	Economic	YES	NO	NO	NO
576	1397	male	Iran Hea	Married	4	Rura	miled	YES	NO	winter	20	heart	8	live	Primary	50	employee	Familial	YES	NO	NO	NO
577	1397	male	Iran Hea	Married	5	Urban	low	YES	NO	spring	21	alminium	5	live	High sch	51	employee	Familial	NO	NO	NO	NO
578	1397	male	Iran Hea	Married	6	Rura	miled	YES	NO	summer	22	acetamin	9	live	Primary	23	retired	Unemploy	NO	NO	NO	NO
579	1397	male	Not insu	Single	4	Rura	low	NO	NO	autum	23	javel wa	15	live	Primary	28	non job	Others	NO	NO	NO	NO
580	1397	male	Not insu	Married	5	Rura	low	NO	NO	autum	24	acetamin	10	live	Primary	24	non job	Unemploy	YES	NO	NO	NO
581	1397	male	Not insu	Married	6	Urban	low	YES	NO	autum	1	acetamin	8	live	High sch	54	employee	Economic	YES	NO	NO	YES
582	1397	male	Not insu	Married	7	Rura	miled	YES	NO	winter	2	lorazpam	5	live	High sch	46	self emp	Familial	NO	NO	NO	NO
583	1397	male	Not insu	Single	10	Rura	miled	YES	NO	winter	3	alchol	9	live	Primary	43	self emp	Economic	YES	NO	NO	NO
584	1397	female	Social S	Widowed	11	Rura	miled	NO	NO	spring	4	tramadol	9	live	High sch	41	self emp	Economic	NO	YES	NO	YES
585	1397	female	General	Married	2	Rura	low	NO	NO	spring	5	TCA	6	live	Primary	34	self emp	Familial	YES	YES	NO	NO
586	1397	female	Social S	Single	3	Rura	low	NO	NO	summer	6	آمفت	10	live	Primary	38	self emp	Economic	YES	YES	NO	NO
587	1397	male	Not insu	Married	2	Urban	low	YES	NO	autum	7	TCA	8	live	High sch	39	non job	Mental d	YES	NO	NO	NO
588	1397	female	Not insu	Married	4	Rura	low	NO	NO	autum	8	heart	5	live	High sch	49	non job	Familial	YES	NO	NO	NO
589	1397	male	Iran Hea	Married	3	Rura	low	YES	NO	autum	9	alminium	9	live	High sch	48	employee	Mental d	NO	NO	YES	YES
590	1397	female	Not insu	Widowed	3	Rura	miled	NO	NO	winter	10	javel wa	9	live	Diploma	47	self emp	Others	YES	NO	NO	NO
591	1397	male	Not insu	Divorced	5	Rura	high	YES	NO	spring	11	acetamin	10	live	High sch	45	self emp	Familial	YES	NO	NO	NO
592	1397	female	Not insu	Married	1	Rura	high	NO	NO	summer	12	acetamin	9	live	Primary	57	non job	Economic	YES	NO	NO	NO
593	1397	male	Not insu	Widowed	6	Urban	miled	YES	NO	autum	13	acetamin	10	live	High sch	78	non job	Familial	YES	NO	NO	NO
594	1397	male	Not insu	Widowed	5	Rura	low	YES	NO	autum	14	alminium	9	dead	Primary	74	employee	Familial	YES	NO	NO	NO
595	1397	female	Social S	Widowed	2	Rura	low	NO	NO	autum	15	alminium	7	live	Primary	76	retired	Mental d	YES	NO	YES	NO
596	1397	male	Social S	Widowed	1	Rura	low	YES	NO	spring	16	alminium	10	live	BSc	69	retired	Mental d	NO	NO	YES	NO
597	1397	male	General	Widowed	1	Rura	low	YES	NO	summer	17	lorazpam	9	live	Primary	64	retired	Economic	NO	NO	NO	NO
598	1397	female	Iran Hea	Widowed	1	Urban	low	NO	NO	autum	18	lorazpam	10	live	High sch	78	non job	Familial	YES	NO	NO	NO
599	1397	male	Iran Hea	Divorced	2	Rura	miled	YES	NO	autum	19	alminium	9	live	Primary	74	retired	Economic	YES	NO	NO	NO
600	1397	female	Not insu	Married	5	Rura	low	NO	NO	autum	20	lorazpam	10	live	Primary	74	non job	Familial	YES	YES	NO	NO
601	1397	male	Not insu	Married	6	Rura	low	YES	NO	winter	21	javel wa	8	live	Primary	55	non job	Others	YES	NO	NO	NO
602	1397	male	Iran Hea	Married	4	Rura	low	YES	NO	winter	22	lorazpam	5	live	Diploma	65	employee	Failure	YES	NO	NO	NO
603	1397	female	Not insu	Single	4	Rura	low	NO	NO	spring	23	heart	9	live	High sch	65	self emp	Mental d	YES	YES	YES	NO
604	1397	male	Not insu	Married	5	Rura	low	YES	NO	summer	24	lorazpam	9	live	Primary	56	self emp	Failure	YES	NO	NO	NO
605	1397	male	Social S	Married	6	Rura	low	YES	NO	autum	1	alminium	10	live	Primary	55	self emp	Mental d	YES	NO	YES	NO
606	1397	male	Social S	Married	4	Urban	low	NO	NO	autum	2	TCA	9	live	Primary	25	self emp	Unemploy	YES	NO	NO	NO
607	1397	male	Iran Hea	Single	5	Rura	miled	NO	NO	autum	3	acetamin	10	live	High sch	54	employee	Economic	NO	NO	NO	NO
608	1397	male	Not insu	Widowed	6	Rura	low	YES	NO	winter	4	acetamin	9	live	Primary	57	employee	Familial	YES	NO	NO	NO
609	1397	female	Not insu	Married	4	Rura	low	NO	NO	winter	5	acetamin	7	live	High sch	50	non job	Economic	YES	YES	NO	NO
610	1397	male	General	Married	4	Urban	low	YES	NO	spring	6	alminium	10	live	Diploma	50	self emp	Familial	YES	NO	NO	NO
611	1397	female	Not insu	Widowed	5	Rura	low	NO	NO	spring	7	alminium	9	live	Primary	56	non job	Familial	YES	NO	NO	NO
612	1397	male	Social S	Married	6	Rura	high	YES	NO	summer	8	alminium	10	live	Primary	55	self emp	Mental d	YES	NO	YES	NO
613	1397	male	Social S	Widowed	7	Rura	low	YES	NO	autum	9	javel wa	9	live	BSc	34	self emp	Others	NO	NO	NO	NO
614	1397	male	Not insu	Married	10	Rura	low	YES	NO	autum	10	acetamin	10	live	High sch	58	employee	Economic	YES	NO	NO	NO
615	1397	female	General	Divorced	9	Urban	low	NO	NO	autum	11	alminium	8	live	Diploma	59	non job	Familial	YES	NO	NO	NO
616	1397	male	Not insu	Married	8	Urban	low	YES	NO	winter	12	acetamin	5	live	Primary	65	employee	Economic	YES	NO	NO	NO
617	1397	female	Not insu	Married	7	Urban	low	NO	NO	spring	13	javel wa	15	live	Diploma	61	non job	Others	NO	NO	NO	NO
618	1397	female	Not insu	Married	6	Rura	miled	NO	NO	summer	14	TCA	6	live	Primary	62	employee	Economic	YES	NO	NO	NO
619	1397	male	Social S	Single	5	Rura	low	YES	NO	autum	15	heart	10	live	High sch	63	self emp	Familial	NO	NO	NO	NO
620	1397	female	Not insu	Married	4	Rura	low	NO	NO	autum	16	lorazpam	8	live	High sch	64	non job	Economic	YES	NO	NO	YES
621	1397	male	Not insu	Married	3	Rura	low	YES	NO	autum	17	lorazpam	5	live	Primary	45	employee	Mental d	YES	NO	YES	YES
622	1397	female	Not insu	Married	2	Rura	low	NO	NO	spring	18	alminium	9	live	BSc	43	non job	Familial	YES	YES	NO	YES
623	1397	male	Not insu	Married	1	Rura	miled	YES	NO	summer	19	alminium	9	live	Diploma	46	employee	Economic	YES	NO	NO	NO
624	1397	female	Not insu	Married	3	Urban	high	NO	NO	autum	20	alminium	10	live	Primary	49	non job	Familial	YES	YES	NO	NO
625	1397	male	Iran Hea	Divorced	3	Rura	high	YES	NO	autum	21	javel wa	15	live	Primary	55	non job	Others	YES	NO	NO	YES
626	1397	male	Iran Hea	Married	4	Rura	miled	YES	NO	autum	22	alminium	10	live	Primary	50	employee	Mental d	YES	NO	YES	YES
627	1397	male	Iran Hea	Married	5	Urban	low	YES	NO	winter	23	alminium	8	live	High sch	51	self emp	Mental d	NO	NO	YES	YES
628	1397	male	Iran Hea	Married	6	Rura	miled	YES	NO	winter	24	acetamin	5	live	Primary	34	non job	Unemploy	NO	NO	NO	NO
629	1397	male	Not insu	Single	4	Rura	low	YES	NO	spring	1	javel wa	15	live	Primary	36	non job	Others	NO	NO	NO	NO
630	1397	male	Not insu	Married	5	Rura	low	YES	NO	summer	2	heart	10	live	Primary	36	employee	Unemploy	YES	NO	NO	YES
631	1397	male	Not insu	Married	6	Urban	low	YES	NO	autum	3	acetamin	8	live	High sch	42	self emp	Unemploy	YES	NO	NO	YES
632	1397	male	Not insu	Married	7	Rura	miled	YES	NO	autum	4	alminium	3	dead	High sch	46	self emp	Failure	NO	NO	NO	NO
633	1397	male	Not insu	Single	10	Rura	miled	YES	NO	autum	5	alchol	10	live	Primary	43	self emp	Economic	YES	NO	YES	NO
634	1397	female	Social S	Widowed	11	Rura	miled	NO	NO	winter	6	tramadol	8	live	High sch	41	self emp	Familial	NO	YES	NO	YES
635	1397	female	General	Married	2	Rura	low	NO	NO	winter	7	TCA	6	live	Primary	34	self emp	Mental d	YES	YES	YES	NO
636	1397	female	Social S	Single	3	Rura	low	NO	NO	spring	8	آمفت	14	live	Primary	38	self emp	Familial	YES	YES	NO	NO
637	1397	male	Not insu	Married	2	Urban	low	YES	NO	spring	9	TCA	6	live	High sch	39	employee	Familial	YES	NO	NO	NO
638	1397	female	Not insu	Married	4	Rura	low	NO	NO	summer	10	lorazpam	10	live	High sch	49	non job	Failure	YES	NO	NO	NO
639	1397	male	Iran Hea	Married	3	Rura	low	YES	NO	autum	11	alminium	15	live	High sch	48	non job	Mental d	NO	NO	NO	NO
640	1397	female	Not insu	Widowed	3	Rura	miled	NO	NO	autum	12	acetamin	13	live	Diploma	24	non job	Unemploy	YES	NO	NO	NO
641	1397	male	Not insu	Divorced	5	Rura	high	YES	NO	autum	13	javel wa	15	live	High sch	23	employee	Others	YES	NO	NO	NO
642	1397	female	Not insu	Married	1	Rura	high	NO	NO	winter	14	heart	10	live	Primary	26	self emp	Unemploy	YES	NO	YES	NO
643	1397	male	Not insu	Widowed	6	Urban	miled	YES	NO	spring	15	acetamin	15	live	High sch	27	self emp	Unemploy	YES	NO	NO	NO
644	1397	male	Not insu	Widowed	5	Rura	low	YES	NO	summer	16	acetamin	13	live	Primary	74	self emp	Economic	YES	NO	NO	NO
645	1397	female	Social S	Widowed	2	Rura	low	NO	NO	autum	17	alminium	9	live	Primary	76	retired	Familial	YES	NO	NO	NO
646	1397	male	Social S	Widowed	1	Rura	low	YES	NO	autum	18	javel wa	15	live	Diploma	69	retired	Others	NO	NO	NO	NO
647	1397	male	General	Widowed	1	Rura	low	YES	NO	autum	19	lorazpam	9	live	Primary	64	retired	Familial	NO	NO	NO	NO
648	1397	female	Iran Hea	Widowed	1	Urban	low	NO	NO	spring	20	TCA	6	live	High sch	78	non job	Familial	YES	NO	NO	NO
649	1397	male	Iran Hea	Divorced	2	Rura	miled	YES	NO	summer	21	alminium	10	live	Primary	74	retired	Mental d	YES	NO	YES	NO
650	1397	male	Not insu	Married	5	Rura	low	YES	NO	autum	22	heart	15	live	Primary	56	employee	Failure	YES	NO	NO	NO
651	1397	male	Social S	Married	6	Rura	low	NO	NO	autum	23	alminium	13	live	Primary	55	self emp	Mental d	YES	NO	YES	NO
652	1397	male	Social S	Married	4	Urban	low	NO	NO	autum	24	acetamin	9	live	Primary	54	retired	Familial	YES	NO	NO	NO
653	1397	male	Iran Hea	Single	5	Rura	miled	YES	NO	winter	1	acetamin	6	live	High sch	54	employee	Economic	NO	NO	NO	NO
654	1397	male	Not insu	Widowed	6	Rura	low	YES	NO	winter	2	acetamin	10	live	Primary	57	employee	Familial	YES	NO	NO	NO
655	1397	female	Not insu	Married	4	Rura	low	NO	NO	spring	3	javel wa	15	live	High sch	59	non job	Others	YES	YES	NO	NO
656	1397	male	General	Married	4	Urban	low	YES	NO	summer	4	alminium	10	live	Diploma	50	self emp	Mental d	YES	NO	YES	NO
657	1397	female	Not insu	Widowed	5	Rura	low	NO	NO	autum	5	alminium	15	live	Primary	56	non job	Mental d	YES	NO	YES	NO
658	1397	male	Social S	Married	6	Rura	high	YES	NO	autum	6	TCA	6	live	Primary	55	self emp	Mental d	YES	NO	YES	NO
659	1397	male	Social S	Widowed	7	Rura	low	YES	NO	autum	7	acetamin	10	live	BSc	24	self emp	Unemploy	NO	NO	YES	NO
670	1397	male	Not insu	Married	10	Rura	low	YES	NO	winter	8	acetamin	15	live	High sch	58	employee	Economic	YES	NO	NO	NO
671	1397	female	General	Divorced	9	Urban	low	NO	NO	winter	9	alminium	13	live	Diploma	59	non job	Familial	YES	NO	NO	NO
672	1397	male	Not insu	Married	8	Urban	low	YES	NO	spring	10	heart	9	live	Primary	65	employee	Economic	YES	NO	NO	NO
673	1397	female	Not insu	Married	7	Urban	low	NO	NO	spring	11	آمفت	6	live	Diploma	61	non job	Familial	NO	NO	NO	NO
674	1397	female	Not insu	Married	6	Rura	miled	NO	NO	summer	12	TCA	6	live	Primary	62	employee	Economic	YES	NO	NO	NO
675	1397	male	Social S	Single	5	Rura	low	YES	NO	autum	13	آمفت	10	live	High sch	63	self emp	Familial	NO	NO	NO	NO
676	1397	female	Not insu	Married	4	Rura	low	NO	NO	autum	14	lorazpam	15	live	High sch	64	non job	Economic	YES	NO	NO	YES
677	1397	male	Not insu	Married	3	Rura	low	YES	NO	autum	15	javel wa	15	live	Primary	45	employee	Mental d	YES	NO	YES	YES
678	1397	male	Not insu	Widowed	6	Rura	low	YES	NO	winter	16	acetamin	10	live	Primary	24	employee	Unemploy	YES	NO	NO	NO
679	1397	female	Not insu	Married	4	Rura	low	NO	NO	spring	17	acetamin	15	live	High sch	23	non job	Unemploy	YES	YES	NO	NO
680	1397	male	General	Married	4	Urban	low	YES	NO	summer	18	alminium	13	live	Diploma	50	self emp	Mental d	YES	NO	YES	YES
681	1397	female	Not insu	Widowed	5	Rura	low	NO	NO	autum	19	alminium	9	live	Primary	56	non job	Mental d	YES	NO	YES	YES
682	1397	male	Social S	Married	6	Rura	high	YES	NO	autum	20	alminium	6	live	Primary	55	self emp	Mental d	YES	NO	YES	NO
683	1397	male	Social S	Widowed	7	Rura	low	YES	NO	autum	21	heart	10	live	BSc	23	self emp	Unemploy	NO	NO	NO	NO
684	1397	male	Not insu	Married	10	Rura	low	YES	NO	spring	22	acetamin	13	live	High sch	58	employee	Economic	YES	NO	NO	YES
685	1397	female	General	Divorced	9	Urban	low	NO	NO	summer	23	alminium	11	live	Diploma	59	non job	Familial	YES	NO	NO	NO
686	1397	male	Not insu	Married	8	Urban	low	YES	NO	autum	24	javel wa	15	live	Primary	65	employee	Others	YES	NO	NO	YES
687	1397	female	Not insu	Married	7	Urban	low	NO	NO	autum	1	آمفت	10	live	Diploma	61	non job	Familial	NO	NO	NO	NO
688	1397	female	Not insu	Married	6	Rura	miled	NO	NO	autum	2	TCA	6	live	Primary	62	employee	Economic	YES	NO	NO	YES
689	1397	male	Social S	Single	5	Rura	low	YES	NO	winter	3	آمفت	10	live	High sch	63	self emp	Familial	NO	NO	NO	YES
690	1397	female	Not insu	Married	4	Rura	low	NO	NO	winter	4	lorazpam	15	live	High sch	64	non job	Mental d	YES	NO	YES	YES
691	1397	male	Not insu	Married	3	Rura	low	YES	NO	spring	5	lorazpam	13	live	Primary	45	employee	Familial	YES	NO	NO	NO
692	1397	female	Not insu	Married	2	Rura	low	NO	NO	summer	6	alminium	9	live	BSc	43	non job	Familial	YES	YES	NO	NO
693	1397	male	Not insu	Married	1	Rura	miled	YES	NO	autum	7	alminium	6	live	Diploma	46	employee	Mental d	YES	NO	NO	NO
694	1397	female	Not insu	Married	3	Urban	high	NO	NO	autum	8	heart	10	live	Primary	49	non job	Mental d	YES	YES	NO	NO
695	1397	male	Iran Hea	Divorced	3	Rura	high	YES	NO	autum	9	alminium	13	live	Primary	55	employee	Economic	YES	NO	NO	NO
696	1397	male	Iran Hea	Married	4	Rura	miled	YES	NO	winter	10	alminium	11	live	Primary	50	employee	Familial	YES	NO	NO	NO
697	1397	male	Iran Hea	Married	5	Urban	low	YES	NO	winter	11	alminium	9	live	High sch	51	employee	Economic	NO	NO	NO	NO
698	1397	male	Iran Hea	Married	6	Rura	miled	YES	NO	spring	12	javel wa	15	live	Primary	52	non job	Others	NO	NO	NO	NO
699	1397	male	Not insu	Single	4	Rura	low	YES	NO	spring	13	acetamin	10	live	Primary	56	non job	Familial	NO	NO	NO	NO
700	1397	male	Not insu	Married	5	Rura	low	YES	NO	summer	14	acetamin	15	live	Primary	25	employee	Unemploy	YES	NO	NO	NO
701	1397	male	Not insu	Married	6	Urban	low	YES	NO	autum	15	alminium	3	dead	High sch	27	self emp	Unemploy	YES	NO	NO	NO
702	1397	male	Not insu	Married	7	Rura	miled	NO	NO	autum	16	lorazpam	10	live	High sch	46	self emp	Failure	NO	NO	NO	NO
703	1397	male	Not insu	Single	10	Rura	miled	NO	NO	autum	17	heart	15	live	Primary	43	self emp	Economic	YES	NO	NO	NO
704	1397	female	Social S	Widowed	11	Rura	miled	NO	NO	winter	18	tramadol	13	live	High sch	41	self emp	Familial	NO	YES	NO	NO
705	1397	female	General	Married	2	Rura	low	NO	NO	spring	19	TCA	6	live	Primary	34	self emp	Economic	YES	YES	NO	NO
706	1397	female	Social S	Single	3	Rura	low	NO	NO	summer	20	آمفت	12	live	Primary	38	self emp	Familial	YES	YES	NO	NO
707	1397	male	Not insu	Married	2	Urban	low	YES	NO	autum	21	javel wa	15	live	High sch	39	employee	Others	YES	NO	NO	NO
708	1397	female	Not insu	Married	4	Rura	low	NO	NO	autum	22	lorazpam	10	live	High sch	49	non job	Mental d	YES	NO	YES	NO
709	1397	female	Not insu	Married	5	Rura	low	NO	NO	autum	23	lorazpam	15	live	Primary	74	non job	Failure	YES	YES	NO	NO
710	1397	male	Not insu	Married	6	Rura	low	YES	NO	spring	24	lorazpam	13	live	Primary	55	non job	Failure	YES	NO	NO	NO
711	1397	male	Iran Hea	Married	4	Rura	low	YES	NO	summer	1	javel wa	15	live	Diploma	65	employee	Others	YES	NO	NO	NO
712	1397	female	Not insu	Single	4	Rura	low	NO	NO	autum	2	alminium	10	live	High sch	65	self emp	Mental d	YES	YES	YES	NO
713	1397	male	Not insu	Married	5	Rura	low	YES	NO	autum	3	lorazpam	15	live	Primary	56	self emp	Failure	YES	NO	NO	NO
714	1397	male	Social S	Married	6	Rura	low	YES	NO	autum	4	heart	13	live	Primary	55	self emp	Economic	YES	NO	NO	NO
715	1397	male	Social S	Married	4	Urban	low	NO	NO	winter	5	acetamin	9	live	Primary	54	retired	Familial	YES	NO	NO	NO
716	1397	male	Iran Hea	Single	5	Rura	miled	NO	NO	winter	6	acetamin	6	live	High sch	54	non job	Economic	NO	NO	NO	NO
717	1397	male	Not insu	Widowed	6	Rura	low	YES	NO	spring	7	acetamin	10	live	Primary	57	non job	Familial	YES	NO	NO	NO
718	1397	female	Not insu	Married	4	Rura	low	NO	NO	summer	8	heart	13	live	High sch	23	non job	Unemploy	YES	YES	NO	NO
719	1397	male	General	Married	4	Urban	low	YES	NO	autum	9	alminium	11	live	Diploma	50	self emp	Mental d	YES	NO	YES	NO
720	1397	female	Not insu	Widowed	5	Rura	low	NO	NO	autum	10	alminium	9	live	Primary	56	non job	Mental d	YES	NO	YES	NO
721	1397	male	Social S	Married	6	Rura	high	YES	NO	autum	11	javel wa	15	live	Primary	55	self emp	Others	YES	NO	NO	NO
722	1397	male	Social S	Widowed	7	Rura	low	YES	NO	spring	12	acetamin	10	live	BSc	24	self emp	Unemploy	NO	NO	NO	NO
726	1397	male	Not insu	Married	10	Rura	low	YES	NO	summer	13	acetamin	15	live	High sch	26	employee	Mental d	YES	NO	NO	NO
727	1397	female	General	Divorced	9	Urban	low	NO	NO	autum	14	alminium	13	live	Diploma	59	non job	Economic	YES	NO	NO	NO
728	1397	male	Not insu	Married	8	Urban	low	YES	NO	autum	15	alminium	3	dead	Primary	65	employee	Familial	YES	NO	NO	YES
729	1397	female	Not insu	Married	7	Urban	low	NO	NO	autum	16	heart	10	live	Diploma	61	non job	Economic	NO	NO	NO	NO
730	1397	female	Not insu	Married	6	Rura	miled	NO	NO	winter	17	آمفت	15	live	Primary	62	employee	Familial	YES	NO	NO	YES
731	1397	male	Social S	Single	5	Rura	low	YES	NO	spring	18	آمفت	13	live	High sch	63	self emp	Familial	NO	NO	NO	YES
732	1397	female	Not insu	Married	4	Rura	low	NO	NO	summer	19	javel wa	15	live	High sch	64	non job	Others	YES	NO	NO	YES
733	1397	male	Not insu	Married	3	Rura	low	YES	NO	autum	20	lorazpam	10	live	Primary	45	employee	Failure	YES	NO	NO	NO
734	1397	female	Not insu	Married	2	Rura	low	NO	NO	autum	21	alminium	15	live	Primary	43	non job	Mental d	YES	YES	YES	NO
735	1397	male	Not insu	Married	1	Rura	miled	YES	NO	autum	22	alminium	13	live	Diploma	46	employee	Mental d	YES	NO	YES	NO
736	1397	female	Not insu	Married	3	Urban	high	NO	NO	spring	23	alminium	9	live	Primary	49	non job	Mental d	YES	YES	YES	NO
737	1397	male	Iran Hea	Divorced	3	Rura	high	YES	NO	summer	1	heart	10	live	Primary	55	non job	Mental d	YES	NO	YES	NO
738	1397	male	Iran Hea	Married	4	Rura	miled	YES	NO	autum	2	alminium	10	live	Primary	50	non job	Economic	YES	NO	YES	NO
739	1397	male	Iran Hea	Married	5	Urban	low	YES	NO	autum	3	alminium	13	live	High sch	51	employee	Familial	NO	NO	NO	NO
740	1397	male	Iran Hea	Married	6	Rura	miled	YES	NO	autum	4	heart	11	live	Primary	52	retired	Economic	NO	NO	NO	NO
741	1397	male	Not insu	Single	4	Rura	low	YES	NO	winter	5	acetamin	13	live	Primary	56	non job	Familial	NO	NO	NO	NO
742	1397	male	Not insu	Married	5	Rura	low	YES	NO	winter	6	javel wa	10	live	Primary	59	non job	Others	YES	NO	NO	NO
743	1397	male	Not insu	Married	6	Urban	low	NO	NO	spring	7	acetamin	15	live	High sch	26	employee	Unemploy	YES	NO	NO	NO
744	1397	male	Not insu	Married	7	Rura	miled	NO	NO	summer	8	lorazpam	13	live	High sch	46	self emp	Mental d	NO	NO	YES	NO
745	1397	male	Not insu	Single	10	Rura	miled	YES	NO	autum	9	alchol	9	live	Primary	43	self emp	Familial	YES	NO	NO	NO
746	1397	female	Social S	Widowed	11	Rura	miled	NO	NO	autum	10	alminium	3	dead	High sch	41	self emp	Economic	NO	YES	NO	NO
747	1397	female	General	Married	2	Rura	low	NO	NO	autum	11	TCA	6	dead	Primary	34	self emp	Familial	YES	YES	NO	NO
748	1397	female	Social S	Single	3	Rura	low	NO	NO	winter	12	آمفت	13	live	Primary	38	self emp	Economic	YES	YES	NO	NO
749	1397	male	Not insu	Married	2	Urban	low	YES	NO	winter	13	TCA	7	live	High sch	39	employee	Familial	YES	NO	NO	NO
750	1397	female	Not insu	Married	4	Rura	low	NO	NO	spring	14	lorazpam	10	live	High sch	49	non job	Economic	YES	NO	NO	NO
751	1397	male	Iran Hea	Married	3	Rura	low	YES	NO	spring	15	alminium	15	live	High sch	48	self emp	Mental d	NO	NO	YES	NO
752	1397	female	Not insu	Widowed	3	Rura	miled	NO	NO	summer	16	acetamin	13	live	Diploma	28	non job	Unemploy	YES	NO	NO	NO
753	1397	male	Not insu	Divorced	5	Rura	high	YES	NO	autum	17	javel wa	15	live	High sch	45	non job	Others	YES	NO	NO	NO
754	1397	female	Not insu	Married	1	Rura	high	NO	NO	autum	18	acetamin	10	live	Primary	57	non job	Familial	YES	NO	YES	NO
755	1397	male	Not insu	Widowed	6	Urban	miled	YES	NO	autum	19	heart	15	live	High sch	78	employee	Economic	YES	NO	NO	NO
756	1397	male	Not insu	Widowed	5	Rura	low	YES	NO	winter	20	acetamin	13	live	Primary	74	employee	Familial	YES	NO	NO	NO
757	1397	female	Social S	Widowed	2	Rura	low	NO	NO	spring	21	alminium	9	live	Primary	76	retired	Familial	YES	NO	NO	NO
758	1397	male	Social S	Widowed	1	Rura	low	YES	NO	summer	22	alminium	6	live	BSc	69	retired	Mental d	NO	NO	YES	NO
759	1397	male	General	Widowed	1	Rura	low	YES	YES	autum	23	heart	10	live	Primary	64	retired	Failure	NO	NO	NO	NO
760	1397	female	Iran Hea	Widowed	1	Urban	low	NO	NO	autum	24	alminium	3	dead	High sch	78	non job	Failure	YES	NO	NO	NO
761	1397	male	Iran Hea	Divorced	2	Rura	miled	NO	NO	autum	1	alminium	10	live	Primary	74	retired	Mental d	YES	NO	NO	NO
762	1397	male	Not insu	Married	5	Rura	low	NO	NO	spring	2	lorazpam	15	live	Primary	56	employee	Failure	YES	NO	NO	NO
763	1397	male	Social S	Married	6	Rura	low	YES	YES	summer	3	alminium	13	live	Primary	55	self emp	Mental d	YES	NO	YES	NO
764	1397	male	Social S	Married	4	Urban	low	NO	NO	autum	4	javel wa	15	live	Primary	28	retired	Others	YES	NO	NO	YES
765	1397	male	Iran Hea	Single	5	Rura	miled	NO	YES	autum	5	acetamin	10	live	High sch	29	employee	Unemploy	NO	NO	NO	NO
766	1397	male	Not insu	Widowed	6	Rura	low	YES	NO	autum	6	acetamin	15	live	Primary	25	employee	Unemploy	YES	NO	NO	NO
767	1397	female	Not insu	Married	4	Rura	low	NO	NO	winter	7	heart	13	live	High sch	26	non job	Unemploy	YES	YES	NO	NO
768	1397	male	General	Married	4	Urban	low	YES	NO	winter	8	alminium	9	live	Diploma	50	self emp	Mental d	YES	NO	YES	NO
769	1397	female	Not insu	Widowed	5	Rura	low	NO	NO	spring	9	alminium	6	live	Primary	56	non job	Mental d	YES	NO	YES	NO
770	1397	male	Social S	Married	6	Rura	high	YES	NO	summer	10	javel wa	15	live	Primary	55	self emp	Others	YES	NO	NO	NO
771	1397	male	Social S	Widowed	7	Rura	low	YES	NO	autum	11	acetamin	10	live	BSc	24	self emp	Unemploy	NO	NO	NO	NO
772	1397	male	Not insu	Married	10	Rura	low	YES	YES	autum	12	acetamin	15	live	High sch	58	employee	Economic	YES	NO	NO	NO
773	1397	female	General	Divorced	9	Urban	low	NO	NO	autum	13	alminium	13	live	Diploma	59	non job	Familial	YES	NO	NO	NO
774	1397	male	Not insu	Married	8	Urban	low	YES	NO	winter	14	acetamin	9	live	Primary	65	employee	Economic	YES	NO	NO	NO
775	1397	female	Not insu	Married	7	Urban	low	NO	NO	winter	15	heart	6	live	Diploma	61	non job	Economic	NO	NO	NO	NO
776	1397	female	Not insu	Married	6	Rura	miled	NO	NO	spring	16	آمفت	10	live	Primary	62	employee	Familial	YES	NO	NO	NO
777	1397	male	Social S	Single	5	Rura	low	YES	NO	spring	17	TCA	7	live	High sch	63	self emp	Economic	NO	NO	NO	NO
778	1397	female	Not insu	Married	4	Rura	low	NO	NO	summer	18	lorazpam	9	live	High sch	64	non job	Familial	YES	NO	NO	NO
789	1397	male	Not insu	Married	3	Rura	low	YES	NO	autum	19	javel wa	15	live	Primary	45	employee	Mental d	YES	NO	YES	NO
790	1397	male	Not insu	Widowed	6	Rura	low	YES	NO	autum	20	acetamin	12	live	Primary	26	employee	Unemploy	YES	NO	NO	NO
791	1397	female	Not insu	Married	4	Rura	low	NO	NO	autum	21	alminium	3	dead	High sch	28	non job	Unemploy	YES	YES	NO	NO
792	1397	male	General	Married	4	Urban	low	YES	NO	winter	22	alminium	10	live	Diploma	50	self emp	Mental d	YES	NO	YES	YES
793	1397	female	Not insu	Widowed	5	Rura	low	NO	NO	spring	23	alminium	15	live	Primary	56	non job	Economic	YES	NO	NO	YES
794	1397	male	Social S	Married	6	Rura	high	YES	NO	summer	16	alminium	13	live	Primary	55	self emp	Familial	YES	NO	NO	NO
795	1397	male	Social S	Widowed	7	Rura	low	YES	NO	autum	17	javel wa	15	live	BSc	54	self emp	Others	NO	NO	NO	NO
796	1397	male	Not insu	Married	10	Rura	low	YES	NO	autum	18	acetamin	10	live	High sch	58	employee	Familial	YES	NO	NO	NO
797	1397	female	General	Divorced	9	Urban	low	NO	NO	autum	19	alminium	15	live	Diploma	59	non job	Economic	YES	NO	NO	NO
798	1397	male	Not insu	Married	8	Urban	low	YES	NO	spring	20	acetamin	13	live	Primary	65	employee	Familial	YES	NO	NO	NO
799	1397	female	Not insu	Married	7	Urban	low	NO	NO	summer	21	آمفت	9	live	Diploma	61	non job	Economic	NO	NO	NO	NO
800	1397	female	Not insu	Married	6	Rura	miled	NO	NO	autum	22	TCA	7	live	Primary	62	employee	Familial	YES	NO	NO	NO
801	1397	male	Social S	Single	5	Rura	low	YES	NO	autum	23	javel wa	15	live	High sch	63	self emp	Others	NO	NO	NO	NO
803	1397	female	Not insu	Married	4	Rura	low	NO	NO	autum	24	lorazpam	10	live	High sch	64	non job	Failure	YES	NO	NO	NO
804	1397	male	Not insu	Married	3	Rura	low	YES	NO	winter	9	heart	15	live	Primary	45	employee	Failure	YES	NO	NO	NO
805	1397	female	Not insu	Married	2	Rura	low	NO	YES	winter	10	alminium	13	live	BSc	43	non job	Addictio	YES	YES	NO	NO
806	1397	male	Not insu	Married	1	Rura	miled	YES	NO	spring	11	alminium	9	live	Diploma	46	employee	Mental d	YES	NO	YES	NO
807	1397	female	Not insu	Married	3	Urban	high	NO	NO	summer	12	javel wa	15	live	Primary	49	non job	Others	YES	YES	NO	NO
808	1397	male	Iran Hea	Divorced	3	Rura	high	YES	NO	autum	13	alminium	10	live	Primary	55	employee	Economic	YES	NO	NO	NO
809	1397	male	Iran Hea	Married	4	Rura	miled	YES	NO	autum	14	alminium	15	live	Primary	50	employee	Mental d	YES	NO	YES	NO
810	1397	male	Iran Hea	Married	5	Urban	low	NO	NO	autum	15	alminium	13	live	High sch	51	employee	Economic	NO	NO	NO	NO
811	1397	male	Iran Hea	Married	6	Rura	miled	NO	NO	winter	16	javel wa	15	live	Primary	52	retired	Others	NO	NO	NO	NO
812	1397	male	Not insu	Single	4	Rura	low	YES	NO	winter	17	acetamin	10	live	Primary	56	employee	Familial	NO	NO	NO	NO
813	1397	male	Not insu	Married	5	Rura	low	YES	NO	spring	18	heart	15	live	Primary	59	employee	Familial	YES	NO	NO	NO
814	1397	male	Not insu	Married	6	Urban	low	YES	NO	spring	19	acetamin	13	live	High sch	54	employee	Addictio	YES	NO	NO	NO
815	1397	male	Not insu	Married	7	Rura	miled	YES	NO	summer	20	lorazpam	9	live	High sch	46	employee	Economic	NO	NO	NO	NO
816	1397	male	Not insu	Single	10	Rura	miled	YES	NO	autum	21	detergen	15	live	Primary	43	employee	Others	YES	NO	NO	NO
817	1397	female	Social S	Widowed	11	Rura	miled	NO	NO	autum	22	tramadol	11	live	High sch	41	self emp	Economic	NO	YES	NO	NO
818	1397	female	General	Married	2	Rura	low	NO	NO	autum	23	TCA	7	live	Primary	34	self emp	Familial	YES	YES	NO	NO
819	1397	female	Social S	Single	3	Rura	low	NO	NO	winter	24	detergen	15	live	Primary	38	self emp	Others	YES	YES	NO	NO
820	1397	male	Not insu	Married	2	Urban	low	YES	NO	spring	1	TCA	7	live	High sch	39	employee	Economic	YES	NO	NO	NO
821	1397	female	Not insu	Married	4	Rura	low	NO	NO	summer	2	lorazpam	10	live	High sch	19	non job	Falling	YES	NO	NO	NO
822	1397	female	Not insu	Married	1	Rura	high	NO	NO	autum	3	acetamin	15	live	Primary	57	non job	Failure	YES	NO	NO	NO
823	1397	male	Not insu	Widowed	6	Urban	miled	YES	NO	autum	4	acetamin	13	live	High sch	78	employee	Familial	YES	NO	NO	NO
824	1397	male	Not insu	Widowed	5	Rura	low	YES	NO	autum	5	acetamin	9	live	Primary	74	employee	Familial	YES	NO	NO	NO
825	1397	female	Social S	Widowed	2	Rura	low	NO	NO	spring	6	javel wa	15	live	Primary	76	retired	Others	YES	NO	NO	NO
826	1397	male	Social S	Widowed	1	Rura	low	YES	NO	summer	7	alminium	5	live	BSc	34	retired	Addictio	NO	NO	NO	NO
827	1397	male	General	Widowed	1	Rura	low	YES	YES	autum	8	detergen	15	live	Primary	64	retired	Others	NO	NO	NO	NO
828	1397	female	Iran Hea	Widowed	1	Urban	low	NO	NO	autum	9	lorazpam	12	live	High sch	78	non job	Addictio	YES	NO	NO	NO
829	1397	male	Iran Hea	Divorced	2	Rura	miled	YES	NO	autum	10	alminium	3	dead	Primary	74	retired	Economic	YES	NO	NO	YES
830	1397	female	Social S	Married	1	Urban	miled	NO	NO	winter	11	heart	10	live	Diploma	33	non job	Familial	NO	NO	NO	YES
831	1397	female	General	Single	0.5	Urban	miled	NO	NO	winter	12	opium	15	live	High sch	23	non job	Addictio	NO	NO	NO	NO
832	1397	female	Social S	Married	0.2	Urban	miled	NO	NO	spring	13	pedistum	13	live	Diploma	36	non job	Economic	NO	NO	NO	NO
833	1397	male	Social S	Single	0.3	Urban	miled	YES	NO	summer	14	javel wa	15	live	Diploma	18	self emp	Others	NO	NO	NO	NO
834	1397	male	General	Single	0.4	Urban	miled	YES	NO	autum	15	methadon	10	live	BSc	29	self emp	Familial	NO	NO	NO	NO
835	1397	female	General	Married	1	Urban	miled	NO	NO	autum	16	alchol	15	live	High sch	19	self emp	Falling	NO	NO	NO	NO
836	1397	male	General	Widowed	1.5	Urban	high	YES	NO	autum	17	alchol	13	live	High sch	18	self emp	Falling	NO	NO	NO	NO
837	1397	male	Others	Married	2	Urban	miled	YES	NO	winter	18	alchol	9	live	High sch	19	self emp	Falling	NO	NO	NO	NO
839	1397	female	Not insu	Married	1.2	Urban	miled	NO	NO	winter	19	detergen	15	live	BSc	42	self emp	Others	NO	NO	NO	NO
840	1397	male	Social S	Married	1	Urban	miled	YES	NO	spring	20	antiepli	10	live	BSc	41	5	Familial	NO	NO	NO	NO
841	1397	male	General	Married	0.3	Urban	miled	YES	NO	spring	21	opium	15	live	Diploma	44	self emp	Addictio	NO	NO	NO	NO
842	1397	male	General	Married	0.8	Urban	high	YES	NO	summer	22	opium	13	live	Diploma	33	self emp	Economic	NO	NO	NO	NO
843	1397	male	General	Single	0.6	Urban	low	YES	YES	autum	23	opium	9	live	Diploma	22	self emp	Addictio	NO	NO	NO	NO
844	1397	male	Social S	Married	0.4	Urban	miled	YES	NO	autum	24	antiepli	6	live	Diploma	26	self emp	Economic	YES	NO	NO	NO
845	1397	male	Not insu	Married	0.5	Rura	miled	YES	NO	autum	1	antiepli	10	live	Primary	25	self emp	Mourning	NO	NO	NO	NO
846	1397	female	Iran Hea	Single	0.2	Urban	miled	NO	YES	winter	2	javel wa	15	live	Diploma	29	self emp	Others	NO	YES	NO	NO
847	1397	male	Others	Divorced	2	Rura	low	YES	YES	spring	3	antiepli	8	live	BSc	54	self emp	Familial	NO	NO	NO	NO
848	1397	male	Social S	Married	0.8	Urban	miled	YES	NO	summer	4	antiepli	9	live	BSc	51	employee	Addictio	NO	NO	NO	NO
849	1397	female	Not insu	Married	0.3	Rura	miled	NO	NO	autum	5	alminium	3	dead	Diploma	52	non job	Economic	NO	NO	NO	NO
850	1397	male	General	Married	0.4	Urban	miled	YES	YES	autum	6	antiepli	10	live	BSc	53	self emp	Familial	NO	NO	NO	NO
851	1397	male	General	Married	0.9	Rura	miled	YES	YES	autum	7	pedistum	15	live	Diploma	35	self emp	Economic	NO	NO	NO	NO
852	1397	male	General	Single	0.6	Urban	miled	NO	NO	spring	8	heart	13	live	BSc	37	self emp	Familial	NO	NO	NO	NO
853	1397	male	General	Married	0.5	Rura	miled	NO	NO	summer	9	pedistum	9	live	Diploma	39	self emp	Economic	NO	NO	NO	NO
854	1397	male	Not insu	Widowed	0.5	Rura	high	YES	NO	autum	10	opium	6	live	Diploma	48	self emp	Economic	NO	NO	NO	NO
855	1397	male	Not insu	Married	0.5	Rura	miled	NO	NO	autum	11	javel wa	15	live	BSc	41	self emp	Others	NO	NO	NO	NO
856	1397	male	Social S	Married	0.6	Rura	high	NO	NO	autum	12	alchol	10	live	High sch	19	self emp	Falling	NO	NO	NO	NO
857	1397	male	Social S	Single	0.6	Urban	miled	YES	NO	winter	13	detergen	15	live	Diploma	19	self emp	Others	NO	NO	NO	NO
858	1397	male	General	Married	0.6	Urban	high	YES	NO	winter	14	alchol	10	live	High sch	41	self emp	Familial	NO	NO	NO	NO
859	1397	female	General	Married	0.7	Urban	miled	NO	NO	spring	15	pedistum	15	live	Diploma	45	self emp	Addictio	NO	NO	NO	NO
860	1397	female	Others	Married	0.7	Urban	miled	NO	YES	summer	16	pedistum	13	live	Diploma	30	self emp	Economic	NO	YES	NO	NO
861	1397	female	General	Married	0.8	Urban	miled	NO	YES	autum	17	TCA	7	live	BSc	35	non job	Economic	NO	NO	NO	NO
862	1397	male	General	Single	1	Urban	miled	YES	NO	autum	18	pedistum	10	live	Diploma	40	self emp	Economic	YES	NO	NO	NO
863	1397	male	Social S	Married	1	Rura	high	NO	NO	autum	19	alchol	15	live	Primary	18	self emp	Falling	NO	NO	NO	NO
864	1397	male	General	Married	1	Urban	low	NO	NO	winter	20	javel wa	15	live	BSc	36	self emp	Others	NO	NO	NO	NO
865	1397	male	General	Married	0.5	Urban	miled	YES	NO	winter	21	antiepli	14	live	BSc	47	self emp	Addictio	YES	NO	NO	NO
866	1397	male	Social S	Single	1.5	Rura	miled	YES	NO	spring	22	heart	14	live	BSc	41	self emp	Economic	NO	NO	NO	NO
867	1397	male	General	Single	1.5	Urban	miled	YES	NO	spring	23	methadon	12	live	Diploma	25	self emp	Addictio	NO	NO	NO	NO
868	1397	male	General	Single	0.6	Urban	low	YES	NO	summer	24	detergen	15	live	BSc	26	self emp	Others	YES	NO	NO	NO
869	1397	female	Iran Hea	Married	0.6	Urban	miled	NO	NO	autum	1	opium	12	live	BSc	37	non job	Familial	NO	YES	NO	NO
870	1397	female	Iran Hea	Married	0.8	Rura	low	NO	NO	autum	2	alchol	15	live	BSc	39	self emp	Economic	NO	NO	NO	NO
871	1397	male	Iran Hea	Married	0.7	Urban	low	YES	NO	autum	3	pedistum	13	live	MSc. and	39	employee	Economic	NO	NO	NO	YES
872	1397	male	Iran Hea	Married	0.6	Urban	low	YES	NO	winter	4	opium	14	live	BSc	38	employee	Addictio	NO	NO	NO	NO
873	1397	female	Social S	Married	0.9	Urban	low	NO	NO	spring	5	pedistum	6	live	BSc	48	employee	Economic	NO	NO	NO	YES
874	1397	male	Social S	Married	0.11	Urban	low	YES	YES	summer	6	javel wa	15	live	High sch	19	employee	Others	YES	NO	NO	NO
875	1397	female	Social S	Married	1	Urban	miled	NO	NO	autum	7	antiepli	10	live	Diploma	33	non job	Mourning	NO	NO	NO	YES
876	1397	female	General	Single	0.5	Urban	miled	NO	NO	autum	8	opium	15	live	High sch	23	non job	Addictio	NO	NO	NO	NO
877	1397	female	Social S	Married	0.2	Urban	miled	NO	NO	autum	9	pedistum	13	live	Diploma	36	non job	Economic	NO	NO	NO	NO
878	1397	male	Social S	Single	0.3	Urban	miled	YES	NO	spring	10	alchol	12	live	BSc	19	self emp	Falling	NO	NO	NO	NO
879	1397	male	General	Single	0.4	Urban	miled	YES	NO	summer	11	methadon	9	live	BSc	29	self emp	Familial	NO	NO	NO	NO
880	1397	female	General	Married	1	Urban	miled	NO	NO	autum	12	alchol	10	live	High sch	20	self emp	Falling	NO	NO	NO	NO
881	1397	male	General	Widowed	1.5	Urban	high	YES	NO	autum	13	alchol	13	live	High sch	47	self emp	Familial	NO	NO	NO	NO
882	1397	male	Others	Married	2	Urban	miled	YES	NO	autum	14	alchol	11	live	High sch	45	self emp	Addictio	NO	NO	NO	NO
883	1397	female	Not insu	Married	1.2	Urban	miled	NO	NO	winter	15	javel wa	15	live	High sch	42	self emp	Others	NO	NO	NO	NO
884	1397	male	Social S	Married	1	Urban	miled	YES	NO	winter	16	antiepli	10	live	MSc. and	41	self emp	Addictio	NO	NO	NO	NO
885	1397	male	General	Married	0.3	Urban	miled	YES	NO	spring	17	opium	15	live	Diploma	44	self emp	Economic	NO	NO	NO	NO
886	1397	male	General	Married	0.8	Urban	high	YES	NO	summer	18	detergen	15	live	Diploma	33	self emp	Others	NO	NO	NO	NO
887	1397	male	General	Single	0.6	Urban	low	NO	NO	autum	19	opium	10	live	Diploma	22	self emp	Familial	NO	NO	NO	NO
888	1397	male	Social S	Married	0.4	Urban	miled	NO	NO	autum	20	antiepli	15	live	Diploma	26	self emp	Mourning	YES	NO	NO	NO
889	1397	male	Not insu	Married	0.5	Rura	miled	YES	NO	autum	21	antiepli	13	live	Primary	25	self emp	Familial	NO	NO	NO	NO
890	1397	female	Iran Hea	Single	0.2	Urban	miled	NO	NO	winter	22	antiepli	9	live	Diploma	29	self emp	Addictio	NO	YES	NO	NO
891	1397	male	Others	Divorced	2	Rura	low	YES	NO	winter	23	javel wa	15	live	High sch	54	self emp	Others	NO	NO	NO	NO
892	1397	male	Social S	Married	0.8	Urban	miled	YES	NO	spring	24	antiepli	10	live	High sch	51	self emp	Addictio	NO	NO	NO	NO
893	1397	female	Not insu	Married	0.3	Rura	miled	NO	NO	spring	16	antiepli	15	live	Diploma	52	non job	Economic	NO	NO	NO	NO
894	1397	male	General	Married	0.4	Urban	miled	YES	NO	summer	17	alminium	3	dead	High sch	53	self emp	Familial	NO	NO	NO	NO
895	1397	male	General	Married	0.9	Rura	miled	YES	NO	autum	18	pedistum	10	live	High sch	35	self emp	Economic	NO	NO	NO	NO
896	1397	male	General	Single	0.6	Urban	miled	YES	NO	autum	19	opium	15	live	High sch	37	self emp	Addictio	NO	NO	YES	NO
897	1397	male	General	Married	0.5	Rura	miled	YES	NO	autum	20	pedistum	13	live	Diploma	39	self emp	Economic	NO	NO	NO	NO
898	1397	male	Not insu	Widowed	0.5	Rura	high	YES	NO	winter	21	opium	9	live	High sch	48	self emp	Addictio	NO	NO	NO	NO
899	1397	male	Not insu	Married	0.5	Rura	miled	YES	NO	spring	22	methadon	6	live	High sch	41	self emp	Familial	NO	NO	NO	NO
900	1397	male	Social S	Married	0.6	Rura	high	NO	NO	summer	23	javel wa	15	live	High sch	20	self emp	Others	NO	NO	NO	NO
901	1397	male	Social S	Single	0.6	Urban	miled	NO	NO	autum	24	alchol	10	live	High sch	19	self emp	Falling	NO	NO	NO	NO
902	1397	male	General	Married	0.6	Urban	high	YES	NO	autum	10	alchol	15	live	High sch	19	self emp	Falling	NO	NO	NO	NO
903	1397	female	General	Married	0.7	Urban	miled	NO	NO	autum	11	detergen	15	live	Diploma	45	self emp	Others	NO	NO	NO	NO
904	1397	female	Others	Married	0.7	Urban	miled	NO	NO	spring	12	pedistum	11	live	High sch	30	self emp	Familial	NO	YES	NO	NO
905	1397	female	General	Married	0.8	Urban	miled	NO	NO	summer	13	pedistum	10	live	High sch	35	non job	Addictio	NO	NO	NO	NO
906	1397	male	General	Single	1	Urban	miled	YES	NO	autum	14	pedistum	9	live	High sch	40	self emp	Economic	YES	NO	NO	NO
907	1397	male	Social S	Married	1	Rura	high	YES	NO	autum	15	javel wa	15	live	High sch	41	self emp	Others	NO	NO	NO	NO
908	1397	male	General	Married	1	Urban	low	YES	NO	autum	16	antiepli	11	live	High sch	36	self emp	Familial	NO	NO	NO	NO
909	1397	male	General	Married	0.5	Urban	miled	YES	NO	winter	17	antiepli	10	live	High sch	47	self emp	Familial	YES	NO	NO	NO
910	1397	male	Social S	Single	1.5	Rura	miled	YES	NO	winter	18	antiepli	9	live	High sch	41	self emp	Mourning	NO	NO	NO	NO
911	1397	male	General	Single	1.5	Urban	miled	NO	NO	spring	19	methadon	3	dead	High sch	25	self emp	Familial	NO	NO	NO	NO
912	1397	male	General	Single	0.6	Urban	low	NO	NO	summer	20	opium	3	dead	High sch	26	self emp	Addictio	YES	NO	NO	NO
913	1397	female	Iran Hea	Married	0.6	Urban	miled	NO	NO	autum	21	opium	9	live	High sch	37	non job	Addictio	NO	YES	NO	NO
914	1397	female	Iran Hea	Married	0.8	Rura	low	NO	NO	autum	22	alchol	3	live	High sch	18	self emp	Falling	NO	NO	NO	NO
915	1397	male	Iran Hea	Married	0.7	Urban	low	YES	NO	autum	16	pedistum	12	live	High sch	39	employee	Economic	NO	NO	NO	NO
916	1397	male	Iran Hea	Married	0.6	Urban	low	YES	NO	winter	17	javel wa	15	live	BSc	38	employee	Others	NO	NO	NO	NO
917	1397	female	Social S	Married	0.9	Urban	low	NO	NO	winter	18	pedistum	11	live	BSc	48	employee	Economic	NO	NO	NO	NO
918	1397	male	Social S	Married	0.11	Urban	low	YES	NO	spring	19	alchol	10	live	High sch	40	employee	Familial	YES	NO	NO	NO
919	1397	female	General	Married	0.8	Urban	miled	NO	NO	spring	20	detergen	15	live	BSc	35	non job	Others	NO	NO	NO	NO
920	1397	male	General	Single	1	Urban	miled	YES	NO	summer	21	pedistum	13	live	Diploma	40	self emp	Economic	YES	NO	NO	NO
921	1397	male	Social S	Married	1	Rura	high	YES	NO	autum	22	alminium	3	dead	Primary	41	self emp	Addictio	NO	NO	NO	NO
922	1397	male	General	Married	1	Urban	low	YES	NO	autum	23	antiepli	11	live	High sch	36	self emp	Economic	NO	NO	NO	NO
923	1397	male	General	Married	0.5	Urban	miled	NO	NO	autum	24	antiepli	10	live	High sch	47	self emp	Familial	YES	NO	NO	NO
924	1397	male	Social S	Single	1.5	Rura	miled	NO	NO	winter	8	javel wa	15	live	High sch	41	self emp	Others	NO	NO	NO	YES
925	1397	male	General	Single	1.5	Urban	miled	YES	NO	spring	9	methadon	11	live	Diploma	25	self emp	Familial	NO	NO	NO	NO
926	1397	male	General	Single	0.6	Urban	low	YES	NO	summer	10	opium	10	live	High sch	26	self emp	Addictio	YES	NO	NO	NO
927	1397	female	Iran Hea	Married	0.6	Urban	miled	NO	NO	autum	11	opium	9	live	High sch	37	non job	Familial	NO	YES	NO	NO
928	1397	female	Iran Hea	Married	0.8	Rura	low	NO	NO	autum	12	alchol	3	dead	High sch	19	self emp	Falling	NO	NO	NO	NO
929	1397	male	Iran Hea	Married	0.7	Urban	low	YES	NO	autum	13	pedistum	3	dead	High sch	39	employee	Economic	NO	NO	NO	NO
930	1397	male	Iran Hea	Married	0.6	Urban	low	YES	NO	spring	14	javel wa	15	live	High sch	38	employee	Others	NO	NO	NO	NO
931	1397	female	Social S	Married	0.9	Urban	low	NO	NO	summer	15	pedistum	11	live	High sch	48	employee	Familial	NO	NO	NO	NO
932	1397	male	Social S	Married	0.11	Urban	low	YES	YES	autum	16	alchol	10	live	High sch	40	employee	Addictio	YES	NO	NO	NO
933	1397	female	Social S	Married	1	Urban	miled	NO	NO	autum	17	detergen	15	live	Diploma	33	non job	Others	NO	NO	NO	NO
934	1397	female	General	Single	0.5	Urban	miled	NO	NO	autum	18	opium	11	live	High sch	23	non job	Addictio	NO	NO	NO	NO
935	1397	female	Social S	Married	0.2	Urban	miled	NO	NO	winter	19	pedistum	10	live	Diploma	36	non job	Economic	NO	NO	NO	NO
936	1397	male	Social S	Single	0.3	Urban	miled	YES	NO	winter	20	alchol	9	dead	Diploma	25	self emp	Familial	NO	NO	NO	NO
937	1397	male	General	Single	0.4	Urban	miled	YES	NO	spring	21	javel wa	15	live	Diploma	29	self emp	Others	NO	NO	NO	NO
938	1397	female	General	Married	1	Urban	miled	NO	NO	summer	22	alchol	15	live	High sch	18	self emp	Falling	NO	NO	NO	NO
939	1397	male	General	Widowed	1.5	Urban	high	YES	NO	autum	23	alchol	13	live	Diploma	19	self emp	Falling	NO	NO	NO	NO
940	1397	male	Others	Married	2	Urban	miled	YES	NO	autum	24	alminium	3	dead	Diploma	20	self emp	Falling	NO	NO	NO	NO
941	1397	female	Not insu	Married	1.2	Urban	miled	NO	NO	autum	1	pedistum	11	live	Diploma	42	self emp	Economic	NO	NO	NO	NO
942	1397	male	Social S	Married	1	Urban	miled	YES	NO	winter	2	antiepli	10	live	MSc. and	41	self emp	Mourning	NO	NO	NO	NO
943	1397	male	General	Married	0.3	Urban	miled	YES	NO	winter	3	opium	9	dead	Diploma	44	self emp	Familial	NO	NO	NO	NO
944	1397	male	General	Married	0.8	Urban	high	NO	NO	spring	4	opium	3	dead	Diploma	33	self emp	Addictio	NO	NO	NO	NO
945	1397	male	General	Single	0.6	Urban	low	NO	NO	spring	5	opium	3	dead	Diploma	22	self emp	Economic	NO	NO	NO	NO
946	1397	male	Social S	Married	0.4	Urban	miled	YES	NO	summer	6	javel wa	15	live	Diploma	26	self emp	Familial	YES	NO	NO	YES
947	1397	male	Not insu	Married	0.5	Rura	miled	YES	NO	autum	7	antiepli	11	live	Primary	25	self emp	Economic	NO	NO	NO	NO
948	1397	female	Iran Hea	Single	0.2	Urban	miled	NO	NO	autum	8	antiepli	10	live	Diploma	29	self emp	Familial	NO	YES	NO	NO
949	1397	male	Others	Divorced	2	Rura	low	YES	NO	autum	9	antiepli	9	live	Diploma	54	self emp	Economic	NO	NO	NO	NO
950	1397	male	Social S	Married	0.8	Urban	miled	YES	NO	winter	10	detergen	15	live	Diploma	51	self emp	Others	NO	NO	NO	NO
951	1397	female	Not insu	Married	0.3	Rura	miled	NO	NO	spring	11	antiepli	11	live	Diploma	52	non job	Mourning	NO	NO	NO	NO
952	1397	male	General	Married	0.4	Urban	miled	YES	NO	summer	12	antiepli	10	live	BSc	53	self emp	Familial	NO	NO	NO	NO
953	1397	male	General	Married	0.9	Rura	miled	YES	NO	autum	13	pedistum	9	live	MSc. and	35	self emp	Addictio	NO	NO	NO	NO
954	1397	male	General	Single	0.6	Urban	miled	YES	NO	autum	14	javel wa	15	live	BSc	37	self emp	Others	NO	NO	NO	NO
955	1397	male	General	Married	0.5	Rura	miled	YES	NO	autum	15	pedistum	11	live	Diploma	39	self emp	Addictio	NO	NO	NO	NO
956	1397	male	Not insu	Widowed	0.5	Rura	high	YES	NO	spring	16	opium	10	live	Diploma	48	self emp	Economic	NO	NO	NO	NO
957	1397	male	Not insu	Married	0.5	Rura	miled	YES	NO	summer	17	methadon	9	dead	BSc	41	self emp	Familial	NO	NO	NO	NO
958	1397	male	Social S	Married	0.6	Rura	high	NO	NO	autum	18	alchol	14	live	BSc	40	self emp	Economic	NO	NO	NO	NO
959	1397	male	Social S	Single	0.6	Urban	miled	NO	NO	autum	19	alchol	13	live	Diploma	40	self emp	Economic	NO	NO	NO	NO
960	1397	male	General	Married	0.6	Urban	high	YES	NO	autum	20	alchol	9	dead	High sch	21	self emp	Falling	NO	NO	NO	NO
961	1397	female	General	Married	0.7	Urban	miled	NO	NO	winter	21	pedistum	3	dead	Diploma	45	self emp	Economic	NO	NO	NO	NO
962	1397	female	Others	Married	0.7	Urban	miled	NO	NO	winter	22	pedistum	12	live	Diploma	30	self emp	Economic	NO	YES	NO	NO
963	1397	female	General	Married	0.8	Urban	miled	NO	NO	spring	23	pedistum	13	live	Diploma	35	non job	Economic	NO	NO	NO	NO
964	1397	male	General	Single	1	Urban	miled	YES	NO	summer	24	javel wa	15	live	Diploma	40	self emp	Others	YES	NO	NO	NO
965	1397	male	Social S	Married	1	Rura	high	YES	NO	autum	1	alchol	11	live	Primary	41	self emp	Familial	NO	NO	NO	NO
966	1397	male	General	Married	1	Urban	low	YES	NO	autum	2	antiepli	10	live	Diploma	36	self emp	Addictio	NO	NO	NO	NO
967	1397	male	General	Married	0.5	Urban	miled	YES	NO	autum	3	detergen	15	live	Diploma	47	self emp	Others	YES	NO	NO	NO
968	1397	male	Social S	Single	1.5	Rura	miled	YES	NO	winter	4	antiepli	11	live	Diploma	41	self emp	Addictio	NO	NO	NO	YES
969	1397	male	General	Single	1.5	Urban	miled	NO	NO	winter	5	methadon	10	live	Diploma	25	self emp	Mental d	NO	NO	NO	YES
970	1397	male	General	Single	0.6	Urban	low	NO	NO	spring	6	opium	9	live	Diploma	26	self emp	Familial	YES	NO	NO	YES
971	1397	female	Iran Hea	Married	0.6	Urban	miled	NO	NO	spring	7	opium	3	live	Diploma	37	non job	Economic	NO	YES	NO	YES
972	1397	male	Social S	Single	0.3	Urban	miled	YES	NO	summer	8	javel wa	15	live	Diploma	22	self emp	Others	NO	NO	NO	NO
973	1397	male	General	Single	0.4	Urban	miled	YES	NO	autum	9	methadon	11	live	Diploma	29	self emp	Familial	NO	NO	NO	NO
974	1397	female	General	Married	1	Urban	miled	NO	NO	autum	10	alchol	10	live	High sch	21	self emp	Falling	NO	NO	NO	NO
975	1397	male	General	Widowed	1.5	Urban	high	YES	NO	autum	11	alchol	9	live	Diploma	47	self emp	Familial	NO	NO	NO	NO
976	1397	male	Others	Married	2	Urban	miled	YES	NO	winter	12	alchol	8	live	Diploma	45	self emp	Addictio	NO	NO	NO	NO
979	1397	female	Not insu	Married	1.2	Urban	miled	NO	NO	spring	13	pedistum	10	live	Diploma	42	self emp	Economic	NO	NO	NO	NO
980	1397	male	Social S	Married	1	Urban	miled	YES	NO	summer	14	antiepli	7	live	High sch	41	self emp	Addictio	NO	NO	NO	NO
981	1397	male	General	Married	0.3	Urban	miled	YES	NO	autum	15	opium	11	live	Diploma	44	self emp	Economic	NO	NO	NO	NO
982	1397	male	General	Married	0.8	Urban	high	YES	NO	autum	16	detergen	15	live	Diploma	33	self emp	Others	NO	NO	NO	NO
983	1397	male	General	Single	0.6	Urban	low	YES	NO	autum	17	opium	11	live	Diploma	22	self emp	Mental d	NO	NO	NO	NO
984	1397	male	Social S	Married	0.4	Urban	miled	NO	NO	spring	18	antiepli	10	live	Diploma	26	self emp	Mourning	YES	NO	NO	NO
985	1397	male	Not insu	Married	0.5	Rura	miled	NO	NO	summer	19	javel wa	15	live	Primary	25	self emp	Others	NO	NO	NO	NO
986	1397	female	Iran Hea	Single	0.2	Urban	miled	NO	NO	autum	20	antiepli	11	live	Diploma	29	self emp	Addictio	NO	YES	NO	NO
987	1397	male	Others	Divorced	2	Rura	low	YES	NO	autum	21	antiepli	10	live	Diploma	54	self emp	Economic	NO	NO	NO	NO
988	1397	male	Social S	Married	0.8	Urban	miled	YES	NO	autum	22	antiepli	9	live	Diploma	51	self emp	Addictio	NO	NO	NO	NO
989	1397	female	Not insu	Married	0.3	Rura	miled	NO	NO	winter	23	alminium	3	live	Diploma	52	non job	Economic	NO	NO	NO	NO
990	1397	male	General	Married	0.4	Urban	miled	YES	NO	winter	24	antiepli	11	live	BSc	53	self emp	Familial	NO	NO	NO	NO
991	1397	male	General	Married	0.9	Rura	miled	YES	NO	spring	1	pedistum	10	live	MSc. and	35	self emp	Economic	NO	NO	NO	NO
992	1397	male	General	Single	0.6	Urban	miled	YES	NO	summer	2	opium	13	live	BSc	37	self emp	Economic	NO	NO	NO	NO
993	1397	male	General	Married	0.5	Rura	miled	YES	NO	autum	3	pedistum	14	live	Diploma	39	self emp	Economic	NO	NO	NO	NO
994	1397	male	Not insu	Widowed	0.5	Rura	high	YES	NO	autum	4	opium	3	live	Diploma	48	self emp	Addictio	NO	NO	NO	NO
995	1397	male	Not insu	Married	0.5	Rura	miled	YES	NO	autum	5	javel wa	15	live	BSc	41	self emp	Others	NO	NO	NO	NO
996	1397	male	Social S	Married	0.6	Rura	high	NO	NO	winter	6	alchol	11	live	High sch	20	self emp	Falling	NO	NO	NO	NO
997	1397	male	Social S	Single	0.6	Urban	miled	NO	NO	winter	7	alchol	10	live	Diploma	40	self emp	Familial	NO	NO	NO	NO
998	1397	male	General	Married	0.6	Urban	high	YES	NO	spring	8	alchol	13	live	High sch	41	self emp	Mental d	NO	NO	NO	NO
999	1397	female	General	Married	0.7	Urban	miled	NO	NO	winter	9	detergen	15	live	Diploma	45	self emp	Others	NO	NO	NO	NO
1000	1397	female	Others	Married	0.7	Urban	miled	NO	NO	spring	10	pedistum	11	live	Diploma	30	self emp	Addictio	NO	YES	NO	NO
1001	1397	female	General	Married	0.8	Urban	miled	NO	NO	summer	11	pedistum	10	live	BSc	35	non job	Economic	NO	NO	NO	NO
1002	1397	male	General	Single	1	Urban	miled	YES	NO	autum	12	pedistum	13	live	Diploma	40	self emp	Familial	YES	NO	NO	NO
1003	1397	male	Social S	Married	1	Rura	high	YES	NO	autum	13	alchol	14	live	Primary	41	self emp	Economic	NO	NO	NO	NO
1004	1397	male	General	Married	1	Urban	low	YES	NO	autum	14	javel wa	15	live	BSc	36	self emp	Others	NO	NO	NO	NO
1005	1397	male	General	Married	0.5	Urban	miled	YES	NO	spring	15	antiepli	11	live	Diploma	19	self emp	Falling	YES	NO	NO	NO
1006	1397	male	Social S	Single	1.5	Rura	miled	YES	NO	summer	16	antiepli	10	live	BSc	41	self emp	Failure	NO	NO	NO	NO
1007	1397	male	General	Single	1.5	Urban	miled	NO	NO	autum	17	methadon	13	live	Diploma	25	self emp	Familial	NO	NO	NO	NO
1008	1397	male	General	Single	0.6	Urban	low	NO	NO	autum	18	opium	14	live	BSc	26	self emp	Addictio	YES	NO	NO	NO
1009	1397	female	Iran Hea	Married	0.6	Urban	miled	NO	NO	autum	19	opium	12	live	BSc	37	non job	Addictio	NO	YES	NO	NO
1010	1397	female	Iran Hea	Married	0.8	Rura	low	NO	NO	winter	20	alminium	3	live	BSc	39	self emp	Familial	NO	NO	NO	NO
1011	1397	male	Iran Hea	Married	0.7	Urban	low	YES	NO	winter	21	pedistum	11	live	MSc. and	39	employee	Mental d	NO	NO	NO	NO
1012	1397	male	Iran Hea	Married	0.6	Urban	low	YES	NO	spring	22	opium	10	live	BSc	38	employee	Economic	NO	NO	NO	NO
1013	1397	female	Social S	Married	0.9	Urban	low	NO	NO	summer	23	pedistum	11	live	BSc	48	employee	Addictio	NO	NO	NO	YES
1014	1397	male	Social S	Married	0.11	Urban	low	YES	NO	autum	24	alchol	10	live	High sch	40	employee	Economic	YES	NO	NO	NO
1015	1397	female	Social S	Married	1	Urban	miled	NO	NO	autum	16	antiepli	13	live	Diploma	33	non job	Familial	NO	NO	NO	NO
1016	1397	female	General	Single	0.5	Urban	miled	NO	NO	autum	17	opium	14	live	High sch	23	non job	Economic	NO	NO	NO	NO
1017	1397	female	Social S	Married	0.2	Urban	miled	NO	NO	winter	18	javel wa	15	live	Diploma	36	non job	Others	NO	NO	NO	NO
1018	1397	male	Social S	Single	0.3	Urban	miled	YES	NO	winter	19	alchol	11	live	High sch	19	self emp	Mental d	NO	NO	YES	NO
1019	1397	male	General	Single	0.4	Urban	miled	YES	NO	spring	20	methadon	10	live	Diploma	29	self emp	Familial	NO	NO	NO	NO
1020	1397	female	General	Married	1	Urban	miled	NO	NO	spring	21	detergen	15	live	High sch	19	self emp	Others	NO	NO	NO	NO
1021	1397	male	General	Widowed	1.5	Urban	high	YES	NO	summer	22	alchol	11	live	BSc	47	self emp	Familial	NO	NO	NO	NO
1022	1397	male	Others	Married	2	Urban	miled	YES	NO	autum	23	alchol	10	live	BSc	45	self emp	Addictio	NO	NO	NO	NO
1023	1397	female	Not insu	Married	1.2	Urban	miled	NO	NO	autum	24	pedistum	13	live	BSc	42	self emp	Economic	NO	NO	NO	NO
1024	1397	male	Social S	Married	1	Urban	miled	YES	NO	autum	10	alminium	3	dead	MSc. and	41	self emp	Addictio	NO	NO	NO	NO
1025	1397	male	General	Married	0.3	Urban	miled	NO	NO	winter	11	opium	11	live	Diploma	44	self emp	Economic	NO	NO	NO	NO
1026	1397	male	General	Married	0.8	Urban	high	NO	NO	spring	12	opium	10	live	Diploma	33	self emp	Familial	NO	NO	NO	NO
1027	1397	male	General	Single	0.6	Urban	low	YES	NO	summer	13	opium	13	live	Diploma	22	self emp	Economic	NO	NO	NO	NO
1028	1397	male	Social S	Married	0.4	Urban	miled	YES	NO	autum	14	antiepli	14	live	Diploma	26	self emp	Economic	YES	NO	NO	NO
1029	1397	male	Not insu	Married	0.5	Rura	miled	YES	NO	autum	15	javel wa	15	live	Primary	19	self emp	Others	NO	NO	NO	NO
1030	1397	female	Iran Hea	Single	0.2	Urban	miled	NO	NO	autum	16	antiepli	11	live	Diploma	29	self emp	Familial	NO	YES	NO	NO
1031	1397	male	Others	Divorced	2	Rura	low	YES	NO	spring	17	antiepli	10	live	BSc	54	self emp	Mental d	NO	NO	YES	NO
1032	1397	male	Social S	Married	0.8	Urban	miled	YES	NO	summer	18	antiepli	13	live	BSc	51	self emp	Economic	NO	NO	NO	NO
1033	1397	female	Not insu	Married	0.3	Rura	miled	NO	NO	autum	19	antiepli	14	live	Diploma	52	non job	Addictio	NO	NO	NO	NO
1034	1397	male	General	Married	0.4	Urban	miled	YES	NO	autum	20	antiepli	9	dead	BSc	53	self emp	Economic	NO	NO	NO	NO
1035	1397	male	General	Married	0.9	Rura	miled	NO	NO	autum	21	pedistum	10	live	MSc. and	35	self emp	Familial	NO	NO	NO	YES
1036	1397	male	General	Single	0.6	Urban	miled	NO	NO	winter	22	javel wa	15	live	BSc	37	self emp	Others	NO	NO	NO	NO
1037	1397	male	General	Married	0.5	Rura	miled	YES	NO	winter	23	pedistum	11	live	Diploma	39	self emp	Economic	NO	NO	NO	NO
1038	1397	male	Not insu	Widowed	0.5	Rura	high	YES	NO	spring	24	opium	10	live	Diploma	19	self emp	Falling	NO	NO	NO	NO
1039	1397	male	Not insu	Married	0.5	Rura	miled	NO	NO	summer	1	methadon	13	live	BSc	41	self emp	Familial	NO	NO	NO	NO
1040	1397	male	Social S	Married	0.6	Rura	high	NO	NO	autum	2	alminium	3	dead	BSc	40	self emp	Familial	NO	NO	NO	YES
1041	1397	male	Social S	Single	0.6	Urban	miled	YES	NO	autum	3	TCA	7	dead	Diploma	40	self emp	Addictio	NO	NO	NO	NO
1042	1397	male	General	Married	0.6	Urban	high	YES	NO	autum	16	alchol	11	live	High sch	41	self emp	Economic	NO	NO	NO	NO
1043	1397	female	General	Married	0.7	Urban	miled	NO	NO	winter	17	pedistum	10	live	Diploma	45	self emp	Addictio	NO	NO	NO	YES
1044	1397	female	Others	Married	0.7	Urban	miled	NO	NO	winter	18	pedistum	13	live	MSc. and	30	self emp	Mental d	NO	YES	YES	YES
1045	1397	female	General	Married	0.8	Urban	miled	NO	NO	spring	19	javel wa	15	live	BSc	35	non job	Others	NO	NO	NO	YES
1046	1397	male	General	Single	1	Urban	miled	YES	NO	winter	20	pedistum	11	live	Diploma	40	self emp	Economic	YES	NO	NO	NO
1047	1397	male	Social S	Married	1	Rura	high	NO	NO	spring	21	alchol	10	live	Primary	41	self emp	Economic	NO	NO	NO	NO
1048	1397	male	General	Married	1	Urban	low	NO	NO	summer	22	antiepli	13	live	High sch	21	self emp	Falling	NO	NO	NO	NO
1049	1397	male	General	Married	0.5	Urban	miled	YES	NO	autum	23	antiepli	14	live	BSc	47	self emp	Familial	YES	NO	NO	NO
1050	1397	male	Social S	Single	1.5	Rura	miled	YES	NO	autum	24	antiepli	11	live	BSc	41	self emp	Addictio	NO	NO	NO	NO
1051	1397	male	General	Single	1.5	Urban	miled	NO	NO	autum	13	methadon	10	live	Diploma	25	self emp	Economic	NO	NO	NO	NO
1052	1397	male	General	Single	0.6	Urban	low	NO	NO	spring	14	detergen	15	live	BSc	26	self emp	Others	YES	NO	NO	NO
1053	1397	female	Iran Hea	Married	0.6	Urban	miled	NO	NO	summer	15	opium	11	live	BSc	37	non job	Economic	NO	YES	NO	NO
1054	1397	female	Iran Hea	Married	0.8	Rura	low	NO	NO	autum	16	alchol	10	live	BSc	39	self emp	Familial	NO	NO	NO	NO
1055	1397	male	Iran Hea	Married	0.7	Urban	low	YES	NO	autum	17	pedistum	13	live	MSc. and	39	employee	Economic	NO	NO	NO	NO
1056	1397	male	Iran Hea	Married	0.6	Urban	low	YES	NO	autum	18	opium	14	live	BSc	38	employee	Mental d	NO	NO	YES	NO
1057	1397	female	Social S	Married	0.9	Urban	low	NO	NO	winter	19	javel wa	15	live	BSc	21	employee	Others	NO	NO	NO	NO
1058	1397	male	Social S	Married	0.11	Urban	low	YES	NO	winter	20	alchol	10	live	High sch	40	employee	Failure	YES	NO	NO	NO
1059	1397	female	General	Married	0.8	Urban	miled	NO	NO	spring	16	TCA	7	dead	BSc	35	non job	Economic	NO	NO	NO	NO
1060	1397	male	General	Single	1	Urban	miled	YES	NO	summer	17	pedistum	11	live	Diploma	40	self emp	Economic	YES	NO	NO	NO
1061	1397	male	Social S	Married	1	Rura	high	NO	NO	autum	18	alchol	10	live	Primary	41	self emp	Familial	NO	NO	NO	NO
1062	1397	male	General	Married	1	Urban	low	NO	NO	autum	19	antiepli	11	live	BSc	36	self emp	Addictio	NO	NO	NO	NO
1063	1397	male	General	Married	0.5	Urban	miled	YES	NO	autum	20	antiepli	10	live	BSc	47	self emp	Economic	YES	NO	NO	NO
1064	1397	male	Social S	Single	1.5	Rura	miled	YES	NO	winter	21	antiepli	13	live	BSc	41	self emp	Addictio	NO	NO	NO	NO
1065	1397	male	General	Single	1.5	Urban	miled	YES	NO	winter	22	methadon	14	live	Diploma	25	self emp	Economic	NO	NO	NO	NO
1066	1397	male	General	Single	0.6	Urban	low	YES	NO	spring	23	opium	10	live	BSc	26	self emp	Familial	YES	NO	NO	NO
1067	1397	female	Iran Hea	Married	0.6	Urban	miled	NO	NO	spring	24	javel wa	15	live	BSc	37	non job	Others	NO	YES	NO	NO
1068	1397	female	Iran Hea	Married	0.8	Rura	low	NO	NO	summer	6	alchol	11	live	BSc	39	self emp	Economic	NO	NO	NO	NO
1069	1397	male	Iran Hea	Married	0.7	Urban	low	YES	NO	autum	7	pedistum	10	live	MSc. and	39	employee	Economic	NO	NO	NO	NO
1070	1397	male	Iran Hea	Married	0.6	Urban	low	YES	NO	autum	8	opium	13	live	BSc	38	employee	Mental d	NO	NO	YES	NO
1071	1397	female	Social S	Married	0.9	Urban	low	NO	NO	autum	9	alminium	3	dead	BSc	48	employee	Familial	NO	NO	NO	NO
1072	1397	male	Social S	Married	0.11	Urban	low	YES	NO	winter	10	alchol	11	live	High sch	40	employee	Addictio	YES	NO	NO	NO
1073	1397	female	Social S	Married	1	Urban	miled	NO	NO	spring	11	antiepli	10	live	Diploma	33	non job	Economic	NO	NO	NO	NO
1074	1397	female	General	Single	0.5	Urban	miled	NO	NO	summer	12	opium	13	live	High sch	23	non job	Addictio	NO	NO	NO	NO
1075	1397	female	Social S	Married	0.2	Urban	miled	NO	NO	autum	13	pedistum	14	live	Diploma	36	non job	Economic	NO	NO	NO	NO
1076	1397	male	Social S	Single	0.3	Urban	miled	YES	NO	autum	14	javel wa	15	live	Diploma	25	self emp	Others	NO	NO	NO	NO
1077	1397	male	General	Single	0.4	Urban	miled	YES	NO	autum	15	methadon	11	live	Diploma	29	self emp	Economic	NO	NO	NO	NO
1078	1397	female	General	Married	1	Urban	miled	NO	NO	spring	16	alchol	10	live	High sch	41	self emp	Economic	NO	NO	NO	NO
1079	1397	male	General	Widowed	1.5	Urban	high	YES	NO	summer	17	alchol	13	live	BSc	47	self emp	Falling	NO	NO	NO	NO
1080	1397	male	Others	Married	2	Urban	miled	YES	NO	autum	18	alchol	14	live	High sch	21	self emp	Falling	NO	NO	NO	NO
1081	1397	female	Not insu	Married	1.2	Urban	miled	NO	NO	autum	19	pedistum	11	live	BSc	42	self emp	Economic	NO	NO	NO	NO
1082	1397	male	Social S	Married	1	Urban	miled	NO	NO	autum	20	javel wa	15	live	Diploma	41	self emp	Others	NO	NO	NO	NO
1083	1397	male	General	Married	0.3	Urban	miled	NO	NO	winter	21	opium	11	live	Diploma	44	self emp	Addictio	NO	NO	NO	NO
1084	1397	male	General	Married	0.8	Urban	high	YES	NO	winter	22	opium	13	live	Diploma	33	self emp	Economic	NO	NO	NO	NO
1085	1397	male	General	Single	0.6	Urban	low	YES	NO	spring	16	opium	13	live	Diploma	22	self emp	Addictio	NO	NO	NO	NO
1086	1397	male	Social S	Married	0.4	Urban	miled	YES	NO	summer	17	antiepli	14	live	Diploma	26	self emp	Mental d	YES	NO	YES	NO
1087	1397	male	Not insu	Married	0.5	Rura	miled	NO	NO	autum	18	antiepli	11	live	Primary	25	self emp	Familial	NO	NO	NO	NO
1088	1397	female	Iran Hea	Single	0.2	Urban	miled	NO	NO	autum	19	antiepli	10	live	Diploma	29	self emp	Economic	NO	YES	NO	NO
1089	1397	male	Others	Divorced	2	Rura	low	YES	NO	autum	20	antiepli	13	live	BSc	54	self emp	Economic	NO	NO	NO	NO
1090	1397	male	Social S	Married	0.8	Urban	miled	YES	NO	winter	21	antiepli	14	live	High sch	21	self emp	Falling	NO	NO	NO	NO
1091	1397	female	Not insu	Married	0.3	Rura	miled	NO	NO	winter	22	javel wa	15	live	Diploma	52	non job	Others	NO	NO	NO	NO
1092	1397	male	General	Married	0.4	Urban	miled	YES	NO	spring	23	antiepli	11	live	BSc	53	self emp	Familial	NO	NO	NO	NO
1093	1397	male	General	Married	0.9	Rura	miled	YES	NO	spring	24	pedistum	10	live	Diploma	35	self emp	Addictio	NO	NO	NO	NO
1094	1397	male	General	Single	0.6	Urban	miled	YES	NO	summer	9	opium	13	live	BSc	37	self emp	Economic	NO	NO	YES	NO
1095	1397	male	General	Married	0.5	Rura	miled	YES	NO	autum	10	alminium	3	dead	Diploma	39	self emp	Addictio	NO	NO	NO	NO
1096	1397	male	Not insu	Widowed	0.5	Rura	high	NO	NO	autum	11	opium	11	live	Diploma	48	self emp	Economic	NO	NO	NO	NO
1097	1397	male	Not insu	Married	0.5	Rura	miled	NO	NO	autum	12	methadon	10	live	BSc	41	self emp	Familial	NO	NO	NO	NO
1098	1397	male	Social S	Married	0.6	Rura	high	YES	NO	winter	13	alchol	13	live	BSc	40	self emp	Mental d	NO	NO	YES	YES
1099	1397	male	Social S	Single	0.6	Urban	miled	YES	NO	spring	14	alchol	11	live	Diploma	40	self emp	Economic	NO	NO	NO	NO
1000	1397	male	General	Married	0.6	Urban	high	NO	NO	summer	15	alchol	10	live	High sch	21	self emp	Falling	NO	NO	NO	NO
1001	1397	female	General	Married	0.7	Urban	miled	NO	NO	autum	16	pedistum	13	live	Diploma	45	self emp	Failure	NO	NO	NO	NO
1002	1397	female	Others	Married	0.7	Urban	miled	NO	NO	autum	17	detergen	15	live	MSc. and	30	self emp	Others	NO	YES	NO	NO
1003	1397	female	General	Married	0.8	Urban	miled	NO	NO	autum	18	pedistum	11	live	BSc	35	non job	Economic	NO	NO	NO	NO
1004	1397	male	General	Single	1	Urban	miled	YES	NO	spring	19	pedistum	10	live	Diploma	40	self emp	Economic	YES	NO	NO	NO
1005	1397	male	Social S	Married	1	Rura	high	YES	NO	summer	20	alchol	13	live	Primary	41	self emp	Familial	NO	NO	NO	NO
1006	1397	male	General	Married	1	Urban	low	NO	NO	autum	16	javel wa	15	live	BSc	36	self emp	Others	NO	NO	NO	NO
1007	1397	male	General	Married	0.5	Urban	miled	NO	NO	autum	17	antiepli	11	live	BSc	47	self emp	Economic	YES	NO	NO	NO
1008	1397	male	Social S	Single	1.5	Rura	miled	YES	NO	autum	18	antiepli	11	live	BSc	41	self emp	Addictio	NO	NO	NO	NO
1009	1397	male	General	Single	1.5	Urban	miled	NO	NO	winter	19	methadon	11	live	Diploma	25	self emp	Economic	NO	NO	NO	NO
1010	1397	male	General	Single	0.6	Urban	low	NO	NO	winter	20	opium	10	live	BSc	26	self emp	Familial	YES	NO	NO	NO
1011	1397	female	Iran Hea	Married	0.6	Urban	miled	NO	NO	spring	21	opium	11	live	BSc	37	non job	Mental d	NO	YES	NO	NO
1012	1397	male	General	Married	0.6	Urban	high	YES	NO	summer	22	alchol	10	live	High sch	41	self emp	Economic	NO	NO	NO	NO
1013	1397	female	General	Married	0.7	Urban	miled	NO	NO	autum	23	pedistum	13	live	Diploma	45	self emp	Economic	NO	NO	NO	NO
1014	1397	female	Others	Married	0.7	Urban	miled	NO	NO	autum	24	detergen	15	live	MSc. and	30	self emp	Others	NO	YES	NO	NO
1015	1397	female	General	Married	0.8	Urban	miled	NO	NO	autum	7	pedistum	15	live	BSc	35	non job	Economic	NO	NO	NO	NO
1016	1397	male	General	Single	1	Urban	miled	YES	NO	winter	8	pedistum	13	live	Diploma	40	self emp	Economic	YES	NO	NO	NO
1017	1397	male	Social S	Married	1	Rura	high	YES	NO	winter	9	alchol	10	live	Primary	41	self emp	Falling	NO	NO	NO	NO
1018	1397	male	General	Married	1	Urban	low	YES	NO	spring	10	antiepli	6	live	BSc	36	self emp	Mourning	NO	NO	NO	NO
1019	1398	male	General	Married	0.5	Urban	miled	YES	NO	spring	11	alminium	3	dead	BSc	47	self emp	Mourning	YES	NO	NO	NO
1020	1398	male	Social S	Single	1.5	Rura	miled	YES	NO	summer	12	antiepli	15	live	BSc	41	self emp	Mourning	NO	NO	NO	NO
1021	1398	male	General	Single	1.5	Urban	miled	YES	NO	autum	13	methadon	13	live	Diploma	25	self emp	Familial	NO	NO	NO	NO
1022	1398	male	General	Single	0.6	Urban	low	YES	NO	autum	14	opium	10	live	BSc	26	self emp	Addictio	YES	NO	NO	YES
1023	1398	female	Iran Hea	Married	0.6	Urban	miled	NO	NO	autum	15	javel wa	15	dead	BSc	37	non job	Mental d	NO	YES	NO	YES
1024	1398	male	Social S	Single	0.3	Urban	miled	YES	NO	winter	1	alchol	15	live	BSc	25	self emp	Addictio	NO	NO	NO	NO
1025	1398	male	General	Single	0.4	Urban	miled	YES	NO	spring	2	methadon	13	live	BSc	29	self emp	Economic	NO	NO	NO	NO
1026	1398	female	General	Married	1	Urban	miled	NO	NO	summer	3	alchol	10	live	High sch	41	self emp	Addictio	NO	NO	NO	NO
1027	1398	male	General	Widowed	1.5	Urban	high	YES	NO	autum	4	alchol	6	dead	BSc	47	self emp	Economic	NO	NO	NO	NO
1028	1398	male	Others	Married	2	Urban	miled	YES	NO	autum	5	alchol	10	live	BSc	45	self emp	Familial	NO	NO	NO	YES
1029	1398	female	Not insu	Married	1.2	Urban	miled	NO	NO	autum	6	pedistum	9	dead	BSc	42	self emp	Economic	NO	NO	NO	NO
1030	1398	male	Social S	Married	1	Urban	miled	YES	NO	spring	7	detergen	15	live	Diploma	41	self emp	Others	NO	NO	NO	NO
1031	1398	male	General	Married	0.3	Urban	miled	YES	NO	summer	16	opium	15	live	Diploma	44	self emp	Addictio	NO	NO	NO	YES
1032	1398	male	General	Married	0.8	Urban	high	YES	NO	autum	17	opium	13	live	Diploma	33	self emp	Addictio	NO	NO	NO	YES
1033	1398	male	General	Single	0.6	Urban	low	YES	NO	autum	18	opium	10	live	Diploma	22	self emp	Addictio	NO	NO	NO	YES
1034	1398	male	Social S	Married	0.4	Urban	miled	YES	NO	autum	19	antiepli	6	live	Diploma	26	self emp	Familial	YES	NO	NO	YES
1035	1398	male	Not insu	Married	0.5	Rura	miled	YES	NO	winter	20	javel wa	15	live	Primary	25	self emp	Others	NO	NO	NO	NO
1036	1398	female	Iran Hea	Single	0.2	Urban	miled	NO	NO	winter	21	antiepli	15	live	Diploma	29	self emp	Economic	NO	YES	NO	NO
1037	1398	male	Others	Divorced	2	Rura	low	YES	NO	spring	22	antiepli	13	live	BSc	54	self emp	Mental d	NO	NO	NO	NO
1038	1398	male	Social S	Married	0.8	Urban	miled	YES	NO	summer	23	alminium	3	dead	BSc	51	self emp	Economic	NO	NO	NO	NO
1039	1398	female	Not insu	Married	0.3	Rura	miled	NO	NO	autum	24	antiepli	15	live	Diploma	52	non job	Familial	NO	NO	NO	NO
1040	1398	male	General	Married	0.4	Urban	miled	YES	NO	autum	1	antiepli	13	live	BSc	53	self emp	Economic	NO	NO	NO	NO
1041	1398	male	General	Married	0.9	Rura	miled	YES	NO	autum	2	pedistum	10	live	Diploma	35	self emp	Economic	NO	NO	NO	NO
1042	1398	male	General	Single	0.6	Urban	miled	YES	NO	winter	3	opium	6	dead	BSc	37	self emp	Addictio	NO	NO	NO	NO
1043	1398	male	General	Married	0.5	Rura	miled	YES	NO	winter	4	detergen	15	live	Diploma	39	self emp	Others	NO	NO	NO	NO
1044	1398	male	Not insu	Widowed	0.5	Rura	high	NO	NO	spring	5	opium	15	live	Diploma	48	self emp	Addictio	NO	NO	NO	NO
1045	1398	male	Not insu	Married	0.5	Rura	miled	NO	NO	spring	6	methadon	13	live	BSc	41	self emp	Familial	NO	NO	NO	NO
1046	1398	male	Social S	Married	0.6	Rura	high	YES	NO	summer	7	alchol	10	live	BSc	24	self emp	Falling	NO	NO	NO	NO
1047	1398	male	Social S	Single	0.6	Urban	miled	YES	NO	autum	8	alchol	6	live	Diploma	32	self emp	Falling	NO	NO	NO	NO
1048	1398	male	General	Married	0.6	Urban	high	NO	NO	autum	9	javel wa	15	live	High sch	27	self emp	Others	NO	NO	NO	NO
1049	1398	female	General	Married	0.7	Urban	miled	NO	NO	autum	10	pedistum	15	live	Diploma	45	self emp	Economic	NO	NO	NO	NO
1050	1398	female	Others	Married	0.7	Urban	miled	NO	NO	winter	11	pedistum	13	live	Diploma	30	self emp	Economic	NO	YES	NO	NO
1051	1398	female	General	Married	0.8	Urban	miled	NO	NO	spring	12	pedistum	10	live	BSc	35	non job	Economic	NO	NO	NO	NO
1052	1398	male	General	Single	1	Urban	miled	YES	NO	summer	13	pedistum	6	dead	Diploma	40	self emp	Mental d	YES	NO	NO	NO
1053	1398	male	Social S	Married	1	Rura	high	YES	NO	autum	14	alminium	3	dead	Primary	22	self emp	Falling	NO	NO	NO	NO
1054	1398	male	General	Married	1	Urban	low	YES	NO	autum	15	antiepli	15	live	BSc	36	self emp	Mourning	NO	NO	NO	NO
1055	1398	male	General	Married	0.5	Urban	miled	YES	NO	autum	16	antiepli	13	live	BSc	47	self emp	Mourning	YES	NO	NO	NO
1056	1398	male	Social S	Single	1.5	Rura	miled	YES	NO	spring	17	antiepli	10	live	BSc	41	self emp	Mourning	NO	NO	NO	NO
1057	1398	male	General	Single	1.5	Urban	miled	YES	NO	summer	18	methadon	6	live	Diploma	25	self emp	Familial	NO	NO	NO	NO
	1398	female	Not insu	Single	3	Rura	low	NO	NO	autum	19	alchol	10	live	Primary	19	non job	Falling	YES	NO	NO	NO
	1398	female	Not insu	Widowed	2.5	Rura	low	NO	NO	autum	20	javel wa	15	live	Primary	55	non job	Others	YES	NO	NO	NO
	1398	male	Not insu	Single	2	Rura	low	YES	NO	autum	21	lorazpam	15	live	Primary	46	non job	Failure	YES	NO	NO	NO
	1398	male	Not insu	Single	2.5	Rura	low	YES	NO	winter	16	lorazpam	13	live	Primary	57	employee	Failure	YES	NO	NO	YES
	1398	male	Not insu	Divorced	4	Rura	low	YES	NO	winter	17	detergen	15	live	Primary	19	non job	Others	NO	NO	NO	YES
	1398	male	Iran Hea	Widowed	3	Urban	miled	NO	NO	spring	18	lorazpam	15	live	High sch	52	non job	Familial	NO	NO	NO	NO
	1398	male	Not insu	Married	3.5	Urban	low	NO	NO	summer	19	آمفت	13	live	High sch	48	employee	Addictio	NO	NO	NO	YES
	1398	male	Not insu	Married	2.5	Rura	low	YES	NO	autum	20	TCA	7	live	Diploma	46	self emp	Mental d	YES	NO	NO	NO
	1398	male	Social S	Widowed	2	Rura	miled	YES	YES	autum	21	lorazpam	15	live	Diploma	60	self emp	Addictio	YES	NO	NO	NO
	1398	male	Not insu	Divorced	1	Rura	low	NO	NO	autum	22	آمفت	13	live	Diploma	49	self emp	Economic	YES	NO	NO	NO
	1398	male	Iran Hea	Divorced	1.5	Rura	low	NO	NO	winter	23	TCA	7	dead	High sch	50	non job	Familial	YES	NO	NO	NO
	1398	female	Not insu	Widowed	3	Urban	miled	NO	NO	winter	24	methadon	9	live	High sch	55	non job	Familial	YES	NO	NO	NO
	1398	male	Not insu	Widowed	3	Rura	low	YES	NO	spring	7	javel wa	15	live	High sch	54	employee	Others	YES	NO	NO	NO
	1398	male	Not insu	Single	2	Rura	miled	YES	NO	spring	8	opium	15	live	High sch	51	employee	Addictio	NO	NO	NO	NO
	1398	male	General	Married	2	Rura	low	YES	NO	summer	9	lorazpam	13	live	High sch	52	employee	Familial	YES	NO	NO	NO
	1398	female	Not insu	Married	2.5	Urban	low	NO	NO	autum	10	alminium	3	dead	High sch	57	non job	Addictio	YES	YES	NO	NO
	1398	male	Not insu	Single	2.5	Urban	miled	YES	NO	autum	11	tramadol	15	live	Primary	48	employee	Economic	YES	NO	NO	NO
	1398	male	Others	Widowed	3	Rura	low	YES	NO	autum	12	آمفت	13	live	High sch	52	self emp	Addictio	YES	NO	NO	NO
	1398	female	Not insu	Single	3.5	Rura	miled	NO	NO	winter	13	TCA	7	live	High sch	35	non job	Mental d	NO	YES	NO	NO
	1398	female	Not insu	Single	4	Rura	miled	NO	NO	spring	14	lorazpam	15	live	Primary	52	non job	Failure	YES	NO	NO	NO
	1398	male	Iran Hea	Single	4	Urban	high	YES	NO	summer	15	lorazpam	13	live	Diploma	34	non job	Failure	YES	NO	NO	NO
	1398	male	Social S	Single	1.55	Urban	high	NO	NO	autum	16	javel wa	15	live	Primary	52	non job	Others	NO	YES	NO	NO
	1398	male	Social S	Single	1	Urban	miled	NO	NO	autum	17	detergen	15	live	High sch	52	employee	Others	NO	YES	NO	NO
	1398	male	Iran Hea	Single	2.5	Rura	high	YES	NO	autum	18	pedistum	15	live	High sch	46	self emp	Economic	YES	YES	NO	NO
	1398	male	Not insu	Married	2	Urban	miled	YES	YES	spring	19	opium	13	live	Primary	45	self emp	Addictio	YES	NO	NO	NO
	1398	female	Not insu	Single	3	Rura	low	NO	NO	summer	20	alchol	10	live	Primary	19	non job	Falling	NO	NO	NO	NO
	1398	female	Not insu	Widowed	2.5	Rura	low	NO	NO	autum	21	lorazpam	6	dead	Primary	55	employee	Failure	NO	NO	NO	NO
	1398	male	Not insu	Single	2	Rura	low	YES	NO	autum	22	lorazpam	10	live	Primary	46	employee	Failure	NO	NO	NO	NO
	1398	male	Not insu	Single	2.5	Rura	low	YES	NO	autum	23	lorazpam	9	live	Primary	52	employee	Failure	YES	NO	NO	NO
	1398	male	Not insu	Divorced	4	Rura	low	YES	NO	winter	24	alchol	12	live	Primary	55	employee	Familial	NO	NO	NO	NO
	1398	male	Iran Hea	Widowed	3	Urban	miled	YES	NO	winter	1	javel wa	15	live	High sch	52	non job	Mental d	NO	NO	NO	NO
	1398	male	Not insu	Married	3.5	Urban	low	NO	NO	spring	2	آمفت	9	live	High sch	48	non job	Economic	NO	NO	NO	YES
	1398	male	Not insu	Married	2.5	Rura	low	NO	NO	summer	3	TCA	7	live	Diploma	46	employee	Addictio	YES	NO	NO	NO
	1398	male	Social S	Widowed	2	Rura	miled	YES	NO	autum	16	lorazpam	12	live	Diploma	60	self emp	Economic	YES	NO	NO	NO
	1398	male	General	Married	2	Rura	low	YES	NO	autum	17	alminium	3	live	High sch	52	self emp	Familial	YES	NO	NO	YES
	1398	female	Not insu	Married	2.5	Urban	low	NO	NO	autum	18	lorazpam	15	live	High sch	57	self emp	Addictio	YES	YES	NO	YES
	1398	male	Not insu	Single	2.5	Urban	miled	YES	NO	winter	19	tramadol	13	live	Primary	48	non job	Economic	YES	NO	NO	NO
	1398	male	Others	Widowed	3	Rura	low	YES	NO	winter	20	آمفت	10	live	High sch	43	self emp	Addictio	YES	NO	NO	NO
	1398	female	Not insu	Single	3.5	Rura	miled	NO	NO	spring	21	javel wa	15	live	High sch	52	non job	Others	NO	YES	NO	YES
	1398	female	Not insu	Single	4	Rura	miled	NO	NO	spring	22	lorazpam	9	dead	Primary	52	non job	Failure	YES	NO	NO	YES
	1398	male	Iran Hea	Single	4	Urban	high	YES	NO	summer	23	detergen	15	live	Diploma	52	employee	Others	YES	NO	NO	NO
	1398	male	Social S	Single	1.55	Urban	high	NO	NO	autum	24	lorazpam	15	live	Primary	52	employee	Failure	NO	YES	NO	YES
	1398	male	Social S	Single	1	Urban	miled	NO	NO	autum	13	opium	13	live	High sch	36	employee	Addictio	NO	YES	NO	NO
	1398	male	Iran Hea	Single	2.5	Rura	high	YES	NO	autum	14	pedistum	10	live	High sch	46	self emp	Economic	YES	YES	NO	NO
	1398	male	Not insu	Married	2	Urban	miled	YES	NO	winter	15	opium	6	dead	Primary	45	employee	Mental d	YES	NO	NO	NO
	1398	male	Iran Hea	Single	4	Urban	high	YES	NO	spring	16	lorazpam	10	live	Diploma	52	employee	Failure	YES	NO	NO	NO
	1398	male	Social S	Single	1.55	Urban	high	NO	NO	summer	17	lorazpam	15	live	Primary	52	employee	Failure	NO	YES	NO	YES
	1398	male	Social S	Single	1	Urban	miled	NO	NO	autum	18	opium	13	live	High sch	52	employee	Addictio	NO	YES	NO	NO
	1398	male	Iran Hea	Single	2.5	Rura	high	YES	NO	autum	19	pedistum	10	live	High sch	46	self emp	Familial	YES	YES	NO	NO
	1398	female	Not insu	Married	2	Urban	miled	NO	NO	autum	20	opium	6	live	Primary	45	employee	Addictio	YES	NO	NO	NO
	1398	male	Not insu	Single	5	Rura	low	YES	NO	spring	21	آمفت	10	live	High sch	48	non job	Economic	YES	YES	NO	NO
	1398	male	Not insu	Widowed	4	Urban	low	YES	NO	summer	22	detergen	15	live	High sch	49	employee	Others	NO	NO	NO	NO
	1398	male	Not insu	Divorced	7	Rura	low	YES	NO	autum	23	آمفت	12	live	High sch	74	employee	Economic	NO	NO	NO	NO
	1398	female	Not insu	Married	6	Rura	low	NO	NO	autum	24	TCA	7	dead	Primary	75	non job	Familial	NO	YES	NO	NO
	1398	female	Iran Hea	Single	4	Rura	high	NO	NO	autum	1	lorazpam	15	live	Primary	65	employee	Failure	YES	NO	NO	NO
	1398	male	Social S	Widowed	3	Rura	low	YES	NO	winter	2	lorazpam	13	live	High sch	69	retired	Failure	YES	NO	NO	NO
	1398	male	Social S	Divorced	2	Rura	miled	YES	NO	winter	3	alminium	3	dead	Primary	56	retired	Failure	YES	YES	NO	NO
	1398	male	Iran Hea	Single	1.5	Urban	low	YES	NO	spring	4	lorazpam	15	live	Diploma	58	retired	Failure	NO	NO	YES	NO
	1398	male	Not insu	Widowed	0.5	Rura	low	NO	NO	summer	5	lorazpam	13	live	Primary	69	employee	Failure	YES	NO	NO	NO
	1398	male	Not insu	Divorced	6	Rura	miled	NO	NO	autum	6	alchol	10	live	Diploma	19	non job	Mental d	YES	NO	NO	NO
	1398	male	Not insu	Widowed	3	Rura	miled	YES	NO	autum	7	alchol	6	live	Primary	20	non job	Falling	YES	YES	NO	NO
	1398	male	Not insu	Widowed	1	Rura	miled	YES	NO	autum	8	lorazpam	10	live	High sch	55	non job	Failure	NO	NO	NO	NO
	1398	male	Not insu	Single	2	Urban	low	YES	NO	winter	9	lorazpam	9	live	Primary	54	employee	Familial	YES	NO	NO	NO
	1398	male	Not insu	Divorced	2.5	Rura	low	YES	NO	winter	10	alchol	15	live	High sch	43	employee	Addictio	NO	NO	NO	NO
	1398	female	Iran Hea	Married	2.5	Rura	low	NO	NO	spring	11	opium	13	live	Diploma	37	self emp	Economic	NO	NO	YES	NO
	1398	male	Social S	Married	2	Rura	high	YES	NO	spring	12	آمفت	10	live	Diploma	39	self emp	Addictio	YES	NO	NO	NO
	1398	male	Not insu	Married	3	Rura	low	NO	NO	summer	13	javel wa	15	live	Primary	54	employee	Others	YES	NO	NO	NO
	1398	male	Iran Hea	Single	3	Urban	low	NO	NO	autum	14	tramadol	15	live	High sch	45	self emp	Familial	YES	NO	NO	NO
	1398	female	Iran Hea	Widowed	4	Rura	low	NO	NO	autum	15	alchol	13	live	Primary	46	self emp	Economic	YES	NO	NO	NO
	1398	male	Not insu	Divorced	5	Rura	miled	YES	NO	autum	16	lorazpam	10	live	Primary	65	non job	Failure	YES	YES	NO	NO
	1398	male	Not insu	Single	2	Urban	low	YES	NO	winter	17	lorazpam	6	live	Primary	54	employee	Failure	YES	NO	NO	NO
	1398	female	Not insu	Divorced	2.5	Rura	low	NO	NO	spring	18	detergen	15	live	High sch	22	employee	Others	NO	NO	NO	YES
	1398	female	Iran Hea	Married	2.5	Rura	low	NO	NO	summer	19	opium	10	live	Diploma	65	self emp	Familial	NO	NO	YES	NO
	1398	male	Social S	Married	2	Rura	high	YES	NO	autum	20	آمفت	9	dead	Diploma	39	self emp	Addictio	YES	NO	NO	NO
	1398	male	Not insu	Married	3	Rura	low	YES	NO	autum	16	TCA	7	dead	Primary	54	employee	Economic	YES	NO	NO	NO
	1398	male	Iran Hea	Single	3	Urban	low	YES	NO	autum	17	tramadol	9	live	High sch	45	self emp	Addictio	YES	NO	NO	NO
	1398	male	Iran Hea	Widowed	4	Rura	low	YES	NO	spring	18	alminium	3	dead	Primary	46	self emp	Economic	YES	NO	NO	NO
	1398	male	Not insu	Divorced	5	Rura	miled	YES	NO	summer	19	lorazpam	15	live	Primary	65	non job	Familial	YES	YES	NO	YES
	1398	female	Not insu	Single	3	Rura	low	NO	NO	autum	20	alchol	13	live	Primary	21	non job	Mental d	YES	NO	NO	NO
	1398	female	Not insu	Widowed	2.5	Rura	low	NO	NO	autum	21	lorazpam	10	live	Primary	55	employee	Failure	YES	NO	NO	NO
	1398	female	Not insu	Single	2	Rura	low	NO	NO	autum	22	lorazpam	6	live	Primary	46	employee	Failure	YES	NO	NO	NO
	1398	female	Not insu	Single	2.5	Rura	low	NO	NO	winter	23	lorazpam	10	live	Primary	57	employee	Failure	YES	NO	NO	YES
	1398	male	Not insu	Divorced	4	Rura	low	YES	NO	winter	24	alchol	9	dead	Primary	23	employee	Falling	NO	NO	NO	YES
	1398	male	Iran Hea	Widowed	3	Urban	miled	YES	NO	spring	6	lorazpam	15	live	High sch	52	self emp	Familial	YES	NO	NO	NO
	1398	male	Not insu	Married	3.5	Urban	low	YES	NO	summer	7	آمفت	13	live	High sch	48	employee	Addictio	YES	NO	NO	NO
	1398	male	Not insu	Married	2.5	Rura	low	YES	NO	autum	8	TCA	10	live	Diploma	46	employee	Economic	YES	NO	NO	NO
	1398	male	Social S	Widowed	2	Rura	miled	YES	NO	autum	9	lorazpam	6	live	Diploma	60	employee	Addictio	YES	NO	NO	YES
	1398	male	Not insu	Divorced	1	Rura	low	YES	NO	autum	10	آمفت	10	live	Diploma	49	employee	Economic	NO	NO	NO	YES
	1398	male	Iran Hea	Divorced	1.5	Rura	low	YES	NO	winter	11	TCA	7	live	High sch	50	self emp	Familial	NO	NO	NO	NO
	1398	male	Not insu	Widowed	3	Urban	miled	YES	NO	winter	12	methadon	9	live	High sch	55	non job	Mental d	NO	NO	NO	YES
	1398	male	Not insu	Widowed	3	Rura	low	YES	NO	spring	13	detergen	15	live	High sch	54	employee	Others	YES	NO	NO	NO
	1398	female	Not insu	Single	2	Rura	miled	NO	NO	spring	14	opium	15	live	High sch	51	employee	Addictio	YES	NO	NO	NO
	1398	male	General	Married	2	Rura	low	NO	NO	summer	15	lorazpam	13	live	High sch	52	employee	Familial	YES	NO	NO	NO
	1398	male	Not insu	Married	2.5	Urban	low	NO	NO	autum	16	lorazpam	10	live	High sch	57	non job	Addictio	YES	NO	NO	NO
	1398	male	Not insu	Single	2.5	Urban	miled	YES	NO	autum	17	tramadol	6	live	Primary	48	employee	Economic	YES	NO	NO	NO
	1398	female	Others	Widowed	3	Rura	low	NO	NO	autum	18	آمفت	10	live	High sch	43	self emp	Addictio	YES	NO	NO	NO
	1398	male	Not insu	Single	3.5	Rura	miled	YES	NO	winter	19	TCA	6	dead	High sch	35	non job	Economic	NO	NO	NO	NO
	1398	male	Not insu	Single	4	Rura	miled	YES	NO	spring	20	lorazpam	15	live	Primary	36	non job	Familial	YES	NO	NO	NO
	1398	female	Iran Hea	Single	4	Urban	high	NO	NO	summer	21	lorazpam	13	live	Diploma	34	employee	Failure	YES	YES	NO	NO
	1398	female	Social S	Single	1.55	Urban	high	NO	NO	autum	22	lorazpam	10	live	Primary	35	employee	Failure	YES	NO	NO	NO
	1398	male	Social S	Single	1	Urban	miled	YES	NO	autum	23	opium	6	dead	High sch	36	employee	Addictio	YES	NO	NO	NO
	1398	male	Iran Hea	Single	2.5	Rura	high	YES	NO	autum	24	pedistum	10	live	High sch	46	self emp	Economic	NO	YES	NO	NO
	1398	male	Not insu	Married	2	Urban	miled	YES	NO	spring	1	opium	9	live	Primary	45	employee	Addictio	YES	NO	NO	NO
	1398	male	Not insu	Single	3	Rura	low	YES	NO	summer	2	alchol	12	live	Primary	23	non job	Falling	YES	NO	NO	NO
	1398	male	Not insu	Widowed	2.5	Rura	low	YES	NO	autum	3	TCA	7	dead	Primary	55	employee	Failure	NO	YES	NO	NO
	1398	female	Not insu	Single	2	Rura	low	NO	NO	autum	4	lorazpam	15	live	Primary	46	employee	Mental d	NO	YES	NO	NO
	1398	female	Not insu	Single	2.5	Rura	low	NO	NO	autum	5	lorazpam	13	live	Primary	57	employee	Familial	YES	YES	NO	NO
	1398	male	Not insu	Divorced	4	Rura	low	YES	NO	winter	6	alchol	10	live	Primary	55	employee	Addictio	YES	NO	NO	NO
	1398	male	Iran Hea	Widowed	3	Urban	miled	NO	NO	winter	7	lorazpam	6	live	High sch	52	self emp	Economic	NO	NO	NO	NO
	1398	male	Not insu	Married	3.5	Urban	low	NO	NO	spring	8	javel wa	15	live	High sch	48	employee	Others	NO	NO	NO	NO
	1398	male	Not insu	Married	2.5	Rura	low	YES	NO	summer	9	TCA	15	live	Diploma	46	employee	Economic	NO	NO	NO	NO
	1398	male	Social S	Widowed	2	Rura	miled	YES	NO	autum	10	lorazpam	13	live	Diploma	60	employee	Familial	YES	NO	NO	NO
	1398	male	General	Married	2	Rura	low	YES	NO	autum	11	lorazpam	10	live	High sch	52	employee	Failure	NO	NO	NO	NO
	1398	male	Not insu	Married	2.5	Urban	low	NO	NO	autum	12	lorazpam	6	live	High sch	57	non job	Familial	NO	NO	NO	NO
	1398	male	Not insu	Single	2.5	Urban	miled	NO	NO	spring	13	tramadol	10	live	Primary	48	employee	Addictio	NO	NO	NO	YES
	1398	female	Others	Widowed	3	Rura	low	NO	NO	summer	14	alminium	3	dead	High sch	43	self emp	Economic	YES	NO	NO	NO
	1398	male	Not insu	Single	3.5	Rura	miled	YES	NO	autum	15	TCA	15	live	High sch	35	non job	Addictio	YES	NO	NO	NO
	1398	male	Not insu	Single	4	Rura	miled	YES	NO	autum	16	lorazpam	13	live	Primary	36	non job	Failure	YES	NO	NO	YES
	1398	female	Iran Hea	Single	4	Urban	high	NO	NO	autum	17	lorazpam	10	live	Diploma	34	employee	Failure	YES	YES	NO	YES
	1398	female	Social S	Single	1.55	Urban	high	NO	NO	winter	18	lorazpam	6	dead	Primary	35	employee	Failure	YES	NO	NO	NO
	1398	female	Social S	Single	1	Urban	miled	NO	NO	spring	19	opium	10	live	High sch	36	employee	Mental d	YES	NO	NO	NO
	1398	female	Iran Hea	Single	2.5	Rura	high	NO	NO	summer	20	detergen	15	live	High sch	46	self emp	Others	NO	YES	NO	YES
	1398	male	Not insu	Married	2	Urban	miled	YES	NO	autum	16	opium	15	live	Primary	45	employee	Addictio	YES	NO	NO	YES
	1398	male	Iran Hea	Single	4	Urban	high	YES	NO	autum	17	lorazpam	13	live	Diploma	34	employee	Failure	YES	NO	NO	NO
	1398	male	Social S	Single	1.55	Urban	high	YES	NO	autum	18	lorazpam	10	live	Primary	35	employee	Failure	NO	YES	NO	YES
	1398	male	Social S	Single	1	Urban	miled	YES	NO	winter	19	opium	6	live	High sch	36	employee	Addictio	NO	YES	NO	NO
	1398	male	Iran Hea	Single	2.5	Rura	high	NO	NO	spring	20	pedistum	10	live	High sch	46	self emp	Familial	YES	YES	NO	NO
	1398	male	Not insu	Married	2	Urban	miled	NO	NO	summer	21	opium	9	live	Primary	45	employee	Addictio	YES	NO	NO	NO
	1398	male	Not insu	Single	5	Rura	low	YES	NO	autum	22	آمفت	15	live	High sch	48	non job	Economic	YES	NO	NO	NO
	1398	male	Not insu	Widowed	4	Urban	low	NO	NO	autum	23	TCA	13	live	High sch	49	employee	Addictio	NO	YES	NO	YES
	1398	male	Not insu	Divorced	7	Rura	low	NO	NO	autum	24	آمفت	10	live	High sch	74	employee	Economic	NO	YES	NO	NO
	1398	female	Not insu	Married	6	Rura	low	NO	NO	spring	6	javel wa	15	live	Primary	75	non job	Others	YES	YES	NO	NO
	1398	male	Iran Hea	Single	4	Rura	high	YES	NO	summer	7	lorazpam	15	live	Primary	65	employee	Failure	YES	NO	NO	NO
	1398	male	Social S	Widowed	3	Rura	low	YES	NO	autum	8	lorazpam	13	live	High sch	69	retired	Failure	YES	YES	NO	NO
	1398	male	Social S	Divorced	2	Rura	miled	YES	NO	autum	9	detergen	15	live	Primary	56	retired	Others	NO	NO	NO	NO
	1398	female	Iran Hea	Single	1.5	Urban	low	NO	NO	autum	10	lorazpam	15	live	Diploma	58	retired	Mental d	NO	NO	NO	NO
	1398	male	Not insu	Widowed	0.5	Rura	low	YES	NO	winter	11	lorazpam	13	live	Primary	69	employee	Failure	NO	YES	NO	NO
	1398	male	Not insu	Divorced	6	Rura	miled	YES	NO	winter	12	alchol	10	live	Diploma	19	non job	Falling	YES	NO	NO	NO
	1398	female	Not insu	Widowed	3	Rura	miled	NO	NO	spring	13	alminium	3	dead	Primary	18	non job	Falling	YES	NO	NO	YES
	1398	female	Not insu	Widowed	1	Rura	miled	NO	NO	summer	14	lorazpam	15	live	High sch	55	non job	Failure	YES	YES	NO	NO
	1398	male	Not insu	Single	2	Urban	low	YES	NO	autum	15	lorazpam	13	live	Primary	54	employee	Failure	NO	NO	YES	NO
	1398	male	Not insu	Divorced	2.5	Rura	low	YES	NO	autum	16	alchol	10	live	High sch	43	employee	Familial	YES	NO	NO	NO
	1398	male	Iran Hea	Married	2.5	Rura	low	YES	NO	autum	17	opium	6	dead	Diploma	37	self emp	Addictio	YES	NO	NO	NO
	1398	male	Social S	Married	2	Rura	high	YES	NO	winter	18	detergen	15	live	Diploma	39	self emp	Others	YES	YES	NO	NO
	1398	male	Not insu	Married	3	Rura	low	YES	NO	winter	19	TCA	15	live	Primary	54	employee	Addictio	NO	NO	NO	NO
	1398	female	Iran Hea	Single	3	Urban	low	NO	NO	spring	20	tramadol	13	live	High sch	45	self emp	Economic	YES	NO	NO	NO
	1398	female	Iran Hea	Widowed	4	Rura	low	NO	NO	spring	21	alchol	10	live	Primary	20	self emp	Falling	NO	NO	NO	NO
	1398	male	Not insu	Divorced	5	Rura	miled	YES	NO	summer	22	lorazpam	6	live	Primary	65	non job	Failure	NO	NO	YES	NO
	1398	male	Not insu	Single	2	Urban	low	NO	NO	autum	23	javel wa	15	live	Primary	54	employee	Others	YES	NO	NO	NO
	1398	male	Not insu	Divorced	2.5	Rura	low	NO	NO	autum	24	alchol	15	live	High sch	19	non job	Mental d	YES	NO	NO	NO
	1398	male	Iran Hea	Married	2.5	Rura	low	YES	NO	autum	1	opium	13	live	Diploma	37	self emp	Familial	YES	NO	NO	NO
	1398	male	Social S	Married	2	Rura	high	YES	NO	winter	2	آمفت	10	live	Diploma	39	self emp	Addictio	YES	NO	NO	NO
	1398	male	Not insu	Married	3	Rura	low	YES	NO	spring	3	TCA	6	live	Primary	54	employee	Economic	YES	YES	NO	NO
	1398	male	Iran Hea	Single	3	Urban	low	NO	NO	summer	4	tramadol	10	live	High sch	45	self emp	Addictio	YES	NO	NO	NO
	1398	male	Iran Hea	Widowed	4	Rura	low	NO	NO	autum	5	alchol	9	live	Primary	46	self emp	Economic	NO	NO	NO	NO
	1398	female	Not insu	Divorced	5	Rura	miled	NO	NO	autum	6	lorazpam	15	live	Primary	65	non job	Familial	NO	NO	YES	NO
	1398	female	Not insu	Single	2.5	Rura	low	NO	NO	autum	7	lorazpam	13	live	Primary	57	employee	Failure	YES	NO	NO	NO
	1398	female	Not insu	Divorced	4	Rura	low	NO	NO	spring	8	alchol	10	live	Primary	22	employee	Falling	YES	NO	NO	NO
	1398	male	Iran Hea	Widowed	3	Urban	miled	YES	NO	summer	9	lorazpam	6	live	High sch	52	self emp	Familial	YES	NO	NO	NO
	1398	male	Not insu	Married	3.5	Urban	low	YES	NO	autum	10	detergen	15	live	High sch	48	employee	Others	YES	NO	NO	NO
	1398	male	Not insu	Married	2.5	Rura	low	YES	NO	autum	11	TCA	7	dead	Diploma	46	employee	Economic	YES	YES	NO	YES
	1398	male	Social S	Widowed	2	Rura	miled	YES	NO	autum	12	lorazpam	15	live	Diploma	60	employee	Addictio	YES	NO	NO	NO
	1398	male	Not insu	Divorced	1	Rura	low	YES	NO	winter	13	آمفت	13	live	Diploma	49	employee	Economic	YES	NO	NO	NO
	1398	male	Iran Hea	Divorced	1.5	Rura	low	YES	NO	winter	14	alminium	3	live	High sch	50	self emp	Familial	YES	NO	NO	NO
	1398	male	Not insu	Widowed	3	Urban	miled	YES	NO	spring	15	methadon	15	live	High sch	55	non job	Mental d	YES	NO	NO	YES
	1398	male	Not insu	Widowed	3	Rura	low	YES	NO	summer	16	methadon	13	live	High sch	54	employee	Familial	NO	NO	NO	YES
	1398	male	Not insu	Single	2	Rura	miled	YES	NO	autum	17	opium	10	live	High sch	51	employee	Addictio	NO	NO	NO	NO
	1398	female	General	Married	2	Rura	low	NO	NO	autum	18	lorazpam	6	live	High sch	52	employee	Failure	NO	NO	NO	YES
	1398	male	Not insu	Married	2.5	Urban	low	YES	NO	autum	19	lorazpam	10	live	High sch	57	non job	Familial	YES	NO	NO	NO
	1398	male	Not insu	Single	2.5	Urban	miled	YES	NO	winter	11	tramadol	9	dead	Primary	48	employee	Addictio	YES	NO	NO	NO
	1398	male	Others	Widowed	3	Rura	low	YES	NO	winter	12	آمفت	12	live	High sch	43	self emp	Economic	YES	NO	NO	NO
	1398	female	Not insu	Single	3.5	Rura	miled	NO	NO	spring	13	javel wa	15	live	High sch	35	non job	Others	YES	NO	NO	YES
	1398	male	Not insu	Single	4	Rura	miled	NO	NO	spring	14	lorazpam	15	live	Primary	36	non job	Economic	YES	NO	NO	NO
	1398	male	Iran Hea	Single	4	Urban	high	NO	NO	summer	15	lorazpam	13	live	Diploma	34	employee	Failure	YES	NO	NO	NO
	1398	female	Social S	Single	1.55	Urban	high	NO	NO	autum	16	detergen	15	live	Primary	35	employee	Others	NO	NO	NO	NO
	1398	female	Social S	Single	1	Urban	miled	NO	NO	autum	17	opium	15	live	High sch	36	employee	Addictio	YES	NO	NO	NO
	1398	male	Iran Hea	Single	2.5	Rura	high	YES	NO	autum	18	pedistum	13	live	High sch	46	self emp	Mental d	YES	YES	NO	NO
	1398	male	Not insu	Married	2	Urban	miled	YES	NO	winter	19	opium	10	live	Primary	45	employee	Addictio	YES	NO	NO	NO
	1398	male	Not insu	Single	3	Rura	low	YES	NO	spring	20	alchol	6	live	Primary	21	non job	Falling	YES	NO	NO	NO
	1398	male	Not insu	Widowed	2.5	Rura	low	YES	NO	summer	21	lorazpam	10	live	Primary	55	employee	Failure	NO	YES	NO	NO
	1398	male	Not insu	Single	2	Rura	low	YES	NO	autum	22	lorazpam	9	live	Primary	46	employee	Familial	YES	NO	NO	NO
	1398	female	Not insu	Single	2.5	Rura	low	NO	NO	autum	23	lorazpam	12	live	Primary	57	employee	Addictio	YES	NO	NO	NO
	1398	female	Not insu	Married	3.5	Urban	low	NO	NO	autum	9	آمفت	9	live	High sch	48	employee	Economic	NO	YES	NO	NO
	1398	male	Not insu	Married	2.5	Rura	low	YES	NO	spring	10	detergen	15	live	Diploma	46	employee	Others	NO	YES	NO	NO
	1398	male	Social S	Widowed	2	Rura	miled	YES	NO	summer	11	lorazpam	15	live	Diploma	60	employee	Mental d	YES	YES	NO	NO
	1398	male	General	Married	2	Rura	low	YES	NO	autum	12	lorazpam	13	live	High sch	52	employee	Familial	YES	NO	NO	NO
	1398	male	Not insu	Married	2.5	Urban	low	NO	NO	autum	13	lorazpam	10	live	High sch	57	non job	Failure	YES	NO	NO	NO
	1398	male	Not insu	Single	2.5	Urban	miled	NO	NO	autum	14	tramadol	6	dead	Primary	48	employee	Familial	YES	NO	NO	NO
	1398	male	Others	Widowed	3	Rura	low	YES	NO	winter	15	آمفت	10	live	High sch	43	self emp	Addictio	YES	NO	NO	NO
	1398	male	Not insu	Single	3.5	Rura	miled	YES	NO	winter	16	javel wa	15	live	High sch	35	non job	Others	YES	NO	NO	NO
	1398	male	Not insu	Single	4	Rura	miled	YES	NO	spring	17	lorazpam	15	live	Primary	36	non job	Addictio	NO	NO	NO	NO
	1398	female	Iran Hea	Single	4	Urban	high	NO	NO	summer	18	lorazpam	13	live	Diploma	34	employee	Failure	NO	NO	NO	NO
	1398	male	Social S	Single	1.55	Urban	high	YES	NO	autum	19	lorazpam	10	live	Primary	35	employee	Failure	NO	NO	NO	NO
	1398	male	Social S	Single	1	Urban	miled	YES	NO	autum	20	alminium	3	dead	High sch	36	employee	Addictio	YES	NO	NO	NO
	1398	female	Iran Hea	Single	2.5	Rura	high	NO	NO	autum	21	pedistum	15	live	High sch	46	self emp	Economic	YES	NO	NO	NO
	1398	female	Not insu	Married	2	Urban	miled	NO	NO	winter	22	opium	13	live	Primary	45	employee	Addictio	YES	NO	NO	YES
	1398	female	Not insu	Single	3	Rura	low	NO	NO	winter	23	alchol	10	live	Primary	19	non job	Mental d	YES	YES	NO	YES
	1398	female	Not insu	Widowed	2.5	Rura	low	NO	NO	spring	24	lorazpam	6	live	Primary	55	employee	Failure	YES	NO	NO	NO
	1398	male	Not insu	Single	2	Rura	low	YES	NO	spring	1	lorazpam	10	live	Primary	46	employee	Failure	YES	NO	NO	NO
	1398	male	Not insu	Single	2.5	Rura	low	YES	NO	summer	2	lorazpam	9	live	Primary	57	employee	Failure	NO	YES	NO	YES
	1398	male	Not insu	Divorced	4	Rura	low	YES	NO	autum	3	detergen	15	live	Primary	55	employee	Others	YES	NO	NO	YES
	1398	male	Iran Hea	Widowed	3	Urban	miled	NO	NO	autum	4	lorazpam	15	live	High sch	52	self emp	Addictio	YES	NO	NO	NO
	1398	male	Not insu	Married	3.5	Urban	low	NO	NO	autum	5	آمفت	13	live	High sch	48	employee	Economic	NO	YES	NO	YES
	1398	male	Not insu	Married	2.5	Rura	low	YES	NO	winter	6	TCA	10	live	Diploma	46	employee	Addictio	NO	YES	NO	NO
	1398	male	Social S	Widowed	2	Rura	miled	YES	NO	spring	7	lorazpam	6	live	Diploma	60	employee	Economic	YES	YES	NO	NO
	1398	male	Not insu	Divorced	1	Rura	low	YES	NO	summer	8	آمفت	10	live	Diploma	49	employee	Familial	YES	NO	NO	NO
	1398	male	Iran Hea	Divorced	1.5	Rura	low	YES	NO	autum	9	TCA	9	live	High sch	50	self emp	Economic	YES	NO	NO	NO
	1398	female	Not insu	Widowed	3	Urban	miled	NO	NO	autum	10	javel wa	15	live	High sch	55	non job	Others	NO	YES	NO	NO
	1398	male	Not insu	Widowed	3	Rura	low	YES	NO	autum	11	methadon	15	live	High sch	54	employee	Familial	NO	YES	NO	NO
	1398	male	Not insu	Single	2	Rura	miled	YES	NO	spring	12	opium	13	live	High sch	51	employee	Mental d	YES	YES	NO	NO
	1398	male	General	Married	2	Rura	low	YES	NO	summer	13	alminium	3	dead	High sch	52	employee	Failure	YES	NO	NO	NO
	1398	female	Not insu	Married	2.5	Urban	low	NO	NO	autum	14	lorazpam	15	live	High sch	57	non job	Failure	YES	YES	NO	NO
	1398	male	Not insu	Single	2.5	Urban	miled	YES	NO	autum	15	tramadol	13	live	Primary	48	employee	Familial	NO	NO	NO	NO
	1398	male	Others	Widowed	3	Rura	low	YES	NO	autum	16	آمفت	10	live	High sch	43	self emp	Addictio	NO	NO	NO	NO
	1398	female	Not insu	Single	3.5	Rura	miled	NO	NO	winter	17	TCA	7	dead	High sch	35	non job	Economic	NO	YES	NO	NO
	1398	female	Not insu	Single	4	Rura	miled	NO	NO	winter	18	detergen	15	live	Primary	36	non job	Others	YES	NO	NO	NO
	1398	male	Iran Hea	Single	4	Urban	high	NO	NO	spring	19	lorazpam	15	live	Diploma	34	employee	Failure	YES	NO	YES	NO
	1398	male	Social S	Single	1.55	Urban	high	NO	NO	summer	20	lorazpam	13	live	Primary	35	employee	Failure	YES	YES	NO	NO
	1398	male	Social S	Single	1	Urban	miled	YES	NO	autum	21	opium	10	live	High sch	36	employee	Addictio	NO	NO	NO	NO
	1398	male	Iran Hea	Single	2.5	Rura	high	YES	NO	autum	22	pedistum	6	live	High sch	46	self emp	Economic	YES	NO	NO	NO
	1398	male	Not insu	Married	2	Urban	miled	YES	NO	autum	16	opium	10	live	Primary	45	employee	Addictio	YES	NO	NO	NO
	1398	female	Not insu	Single	3	Rura	low	NO	NO	winter	17	alchol	9	live	Primary	19	non job	Mental d	YES	YES	NO	NO
	1398	female	Not insu	Widowed	2.5	Rura	low	NO	NO	winter	18	lorazpam	12	live	Primary	55	employee	Failure	NO	NO	NO	NO
	1398	male	Not insu	Single	2	Rura	low	YES	NO	spring	19	javel wa	15	live	Primary	46	employee	Others	YES	NO	NO	NO
	1398	male	Not insu	Single	2.5	Rura	low	YES	NO	spring	20	lorazpam	15	live	Primary	57	employee	Failure	NO	NO	NO	NO
	1398	male	Not insu	Divorced	4	Rura	low	YES	NO	summer	21	alchol	13	live	Primary	55	employee	Familial	NO	NO	NO	NO
	1398	male	Iran Hea	Widowed	3	Urban	miled	YES	NO	autum	22	lorazpam	10	live	High sch	52	self emp	Addictio	YES	NO	NO	NO
	1398	male	Not insu	Married	3.5	Urban	low	YES	NO	autum	23	آمفت	6	dead	High sch	48	employee	Economic	YES	NO	NO	NO
	1398	male	Not insu	Married	2.5	Rura	low	YES	NO	autum	24	TCA	7	dead	Diploma	46	employee	Addictio	YES	NO	NO	NO
	1398	male	Social S	Widowed	2	Rura	miled	NO	NO	winter	8	lorazpam	10	live	Diploma	60	employee	Economic	YES	NO	NO	NO
	1398	male	General	Married	2	Rura	low	NO	NO	spring	9	detergen	15	live	High sch	52	employee	Others	YES	YES	NO	NO
	1398	female	Not insu	Married	2.5	Urban	low	NO	NO	summer	10	lorazpam	10	live	High sch	57	non job	Failure	YES	NO	NO	NO
	1398	female	Not insu	Single	2.5	Urban	miled	NO	NO	autum	11	tramadol	9	live	Primary	48	employee	Familial	NO	NO	NO	NO
	1398	female	Others	Widowed	3	Rura	low	NO	NO	autum	12	alminium	3	dead	High sch	43	self emp	Mental d	NO	NO	YES	NO
	1398	male	Not insu	Single	3.5	Rura	miled	YES	NO	autum	13	TCA	7	live	High sch	35	non job	Economic	YES	NO	NO	NO
	1398	male	Not insu	Single	4	Rura	miled	YES	NO	spring	14	lorazpam	15	live	Primary	36	non job	Failure	YES	NO	YES	NO
	1398	male	Iran Hea	Single	4	Urban	high	YES	NO	summer	15	lorazpam	13	live	Diploma	34	employee	Failure	YES	NO	NO	NO
	1398	male	Social S	Single	1.55	Urban	high	YES	NO	autum	16	lorazpam	10	live	Primary	35	employee	Failure	YES	NO	NO	NO
	1398	male	Social S	Single	1	Urban	miled	YES	NO	autum	17	opium	6	live	High sch	36	employee	Addictio	YES	YES	NO	NO
	1398	male	Iran Hea	Single	2.5	Rura	high	YES	NO	autum	18	pedistum	10	live	High sch	46	self emp	Economic	YES	NO	NO	NO
	1398	male	Not insu	Married	2	Urban	miled	YES	NO	winter	19	opium	9	live	Primary	45	employee	Addictio	NO	NO	NO	NO
	1398	male	Iran Hea	Single	4	Urban	high	NO	NO	winter	20	javel wa	15	live	Diploma	34	employee	Others	NO	NO	NO	NO
	1398	male	Social S	Single	1.55	Urban	high	NO	NO	spring	21	lorazpam	15	live	Primary	35	employee	Failure	NO	NO	NO	NO
	1398	female	Social S	Single	1	Urban	miled	NO	NO	summer	22	opium	13	live	High sch	36	employee	Addictio	YES	NO	NO	NO
	1398	male	Iran Hea	Single	2.5	Rura	high	YES	NO	autum	23	pedistum	10	live	High sch	46	self emp	Familial	YES	NO	NO	NO
	1398	male	Not insu	Married	2	Urban	miled	YES	NO	autum	11	opium	6	dead	Primary	45	employee	Addictio	YES	NO	NO	NO
	1398	male	Not insu	Single	5	Rura	low	YES	NO	autum	12	alminium	3	dead	High sch	48	non job	Economic	YES	NO	NO	NO
	1398	female	Not insu	Widowed	4	Urban	low	NO	NO	winter	13	TCA	15	live	High sch	49	employee	Addictio	YES	NO	NO	NO
	1398	male	Not insu	Divorced	7	Rura	low	YES	NO	winter	14	آمفت	13	live	High sch	74	employee	Mental d	YES	NO	NO	NO
	1398	male	Not insu	Married	6	Rura	low	YES	NO	spring	15	TCA	7	live	Primary	75	non job	Familial	NO	NO	NO	NO
	1398	female	Iran Hea	Single	4	Rura	high	NO	NO	spring	16	lorazpam	15	live	Primary	65	employee	Failure	YES	NO	NO	NO
	1398	female	Social S	Widowed	3	Rura	low	NO	NO	summer	17	lorazpam	13	live	High sch	69	retired	Failure	YES	YES	NO	NO
	1398	male	Social S	Divorced	2	Rura	miled	YES	NO	autum	18	javel wa	15	live	Primary	56	retired	Others	YES	NO	NO	NO
	1398	male	Iran Hea	Single	1.5	Urban	low	YES	NO	autum	19	lorazpam	15	live	Diploma	58	retired	Failure	YES	NO	NO	NO
	1398	male	Not insu	Widowed	0.5	Rura	low	YES	NO	autum	20	lorazpam	13	live	Primary	69	employee	Failure	NO	YES	YES	NO
	1398	male	Not insu	Divorced	6	Rura	miled	NO	NO	winter	21	alchol	10	live	Diploma	22	employee	Falling	YES	NO	NO	NO
	1398	male	Not insu	Widowed	3	Rura	miled	NO	NO	spring	22	detergen	15	live	Primary	19	non job	Others	YES	NO	NO	NO
	1398	female	Not insu	Widowed	1	Rura	miled	NO	NO	summer	12	lorazpam	15	live	High sch	55	non job	Failure	NO	YES	NO	NO
	1398	female	Not insu	Single	2	Urban	low	NO	NO	autum	13	lorazpam	13	live	Primary	54	employee	Familial	NO	YES	NO	NO
	1398	male	Not insu	Divorced	2.5	Rura	low	YES	NO	autum	14	alchol	10	live	High sch	43	employee	Addictio	YES	YES	NO	NO
	1398	male	Iran Hea	Married	2.5	Rura	low	YES	NO	autum	15	opium	6	live	Diploma	37	self emp	Economic	YES	NO	NO	NO
	1398	male	Social S	Married	2	Rura	high	YES	NO	spring	16	آمفت	10	live	Diploma	39	self emp	Addictio	YES	NO	NO	NO
	1398	male	Not insu	Married	3	Rura	low	NO	NO	summer	17	TCA	9	live	Primary	54	employee	Mental d	YES	NO	NO	NO
	1398	male	Iran Hea	Single	3	Urban	low	NO	NO	autum	18	tramadol	12	live	High sch	45	self emp	Familial	YES	NO	NO	NO
	1398	male	Iran Hea	Widowed	4	Rura	low	YES	NO	autum	19	detergen	15	live	Primary	19	self emp	Others	YES	NO	NO	NO
	1398	male	Not insu	Divorced	5	Rura	miled	YES	NO	autum	20	lorazpam	15	live	Primary	65	non job	Failure	NO	NO	NO	YES
	1398	male	Not insu	Single	2	Urban	low	YES	NO	winter	21	lorazpam	13	live	Primary	54	employee	Failure	YES	NO	NO	NO
	1398	female	Not insu	Divorced	2.5	Rura	low	NO	NO	winter	22	alchol	10	live	High sch	43	employee	Familial	YES	NO	NO	NO
	1398	female	Iran Hea	Married	2.5	Rura	low	NO	NO	spring	23	opium	6	dead	Diploma	37	self emp	Addictio	YES	NO	NO	YES
	1398	female	Social S	Married	2	Rura	high	NO	NO	summer	24	آمفت	10	live	Diploma	39	self emp	Economic	YES	YES	NO	YES
	1398	male	Not insu	Married	3	Rura	low	YES	NO	autum	1	TCA	7	live	Primary	54	employee	Addictio	YES	NO	NO	NO
	1398	male	Iran Hea	Single	3	Urban	low	YES	NO	autum	2	javel wa	15	live	High sch	45	self emp	Others	YES	NO	NO	NO
	1398	male	Iran Hea	Widowed	4	Rura	low	YES	NO	autum	3	alchol	15	live	Primary	46	self emp	Familial	NO	YES	NO	YES
	1398	male	Not insu	Divorced	5	Rura	miled	YES	NO	winter	4	lorazpam	13	live	Primary	65	non job	Failure	YES	NO	NO	YES
	1398	male	Not insu	Single	3	Rura	low	YES	NO	winter	5	alchol	10	live	Primary	19	non job	Falling	YES	NO	NO	NO
	1398	male	Not insu	Widowed	2.5	Rura	low	YES	NO	spring	6	lorazpam	6	live	Primary	55	employee	Failure	NO	YES	NO	YES
	1398	male	Not insu	Single	2	Rura	low	NO	NO	spring	7	lorazpam	10	live	Primary	46	employee	Mental d	NO	YES	YES	NO
	1398	male	Not insu	Single	2.5	Rura	low	NO	NO	summer	8	lorazpam	9	dead	Primary	57	employee	Failure	YES	YES	NO	NO
	1398	male	Not insu	Divorced	4	Rura	low	YES	NO	autum	9	alchol	12	live	Primary	55	employee	Familial	YES	NO	NO	NO
	1398	female	Iran Hea	Widowed	3	Urban	miled	NO	NO	autum	10	detergen	15	live	High sch	52	self emp	Others	YES	NO	NO	NO
	1398	male	Not insu	Married	3.5	Urban	low	YES	NO	autum	11	آمفت	15	live	High sch	48	employee	Economic	YES	NO	NO	NO
	1398	male	Not insu	Married	2.5	Rura	low	YES	NO	winter	12	TCA	13	live	Diploma	46	employee	Addictio	YES	NO	NO	NO
	1398	male	Social S	Widowed	2	Rura	miled	YES	NO	spring	13	lorazpam	10	live	Diploma	60	employee	Economic	YES	NO	NO	YES
	1398	female	Not insu	Divorced	1	Rura	low	NO	NO	summer	14	alminium	3	dead	Diploma	49	employee	Familial	NO	NO	NO	YES
	1398	male	Iran Hea	Divorced	1.5	Rura	low	YES	NO	autum	15	TCA	15	live	High sch	50	self emp	Economic	NO	NO	NO	NO
	1398	male	Not insu	Widowed	3	Urban	miled	YES	NO	autum	16	methadon	13	live	High sch	55	non job	Familial	NO	NO	NO	NO
	1398	female	Not insu	Widowed	3	Rura	low	NO	NO	autum	17	methadon	10	live	High sch	54	employee	Familial	YES	NO	NO	NO
	1398	female	Not insu	Single	2	Rura	miled	NO	NO	spring	18	javel wa	15	live	High sch	51	employee	Others	YES	NO	NO	NO
	1398	male	General	Married	2	Rura	low	YES	NO	summer	19	lorazpam	15	live	High sch	52	employee	Mental d	YES	NO	NO	NO
	1398	male	Not insu	Married	2.5	Urban	low	YES	NO	autum	20	lorazpam	13	live	High sch	57	non job	Addictio	YES	NO	NO	NO
	1398	male	Not insu	Single	2.5	Urban	miled	YES	NO	autum	21	tramadol	10	live	Primary	48	employee	Economic	YES	NO	NO	NO
	1398	male	Others	Widowed	3	Rura	low	NO	NO	autum	22	آمفت	6	dead	High sch	43	self emp	Addictio	YES	NO	NO	NO
	1398	male	Not insu	Single	3.5	Rura	miled	NO	NO	winter	16	TCA	6	dead	High sch	35	non job	Economic	NO	NO	NO	NO
	1398	female	Not insu	Single	4	Rura	miled	NO	NO	winter	17	lorazpam	15	live	Primary	36	non job	Failure	YES	NO	NO	NO
	1398	female	Iran Hea	Single	4	Urban	high	NO	NO	spring	18	lorazpam	13	live	Diploma	34	employee	Failure	YES	YES	NO	NO
	1398	male	Social S	Single	1.55	Urban	high	YES	NO	summer	19	lorazpam	10	live	Primary	35	employee	Failure	YES	NO	NO	NO
	1398	male	Social S	Single	1	Urban	miled	YES	NO	autum	20	detergen	15	live	High sch	36	employee	Others	YES	NO	NO	NO
	1398	male	Iran Hea	Single	2.5	Rura	high	YES	NO	autum	21	pedistum	15	live	High sch	46	self emp	Economic	NO	YES	NO	NO
	1398	male	Not insu	Married	2	Urban	miled	YES	NO	autum	22	opium	13	live	Primary	45	employee	Addictio	YES	NO	NO	NO
	1400	male	Not insu	Single	3	Rura	low	YES	NO	spring	23	alchol	10	live	Primary	19	non job	Falling	YES	NO	NO	NO
	1400	male	Not insu	Widowed	2.5	Rura	low	YES	NO	summer	24	lorazpam	6	live	Primary	55	employee	Failure	NO	YES	NO	NO
	1400	male	Not insu	Single	2	Rura	low	YES	NO	autum	8	lorazpam	10	live	Primary	46	employee	Failure	NO	YES	NO	NO
	1400	male	Not insu	Single	2.5	Rura	low	NO	NO	autum	9	javel wa	15	live	Primary	57	employee	Others	YES	YES	NO	NO
	1400	female	Not insu	Divorced	4	Rura	low	NO	NO	autum	10	alchol	15	live	Primary	55	employee	Mental d	YES	NO	YES	NO
	1400	male	Iran Hea	Widowed	3	Urban	miled	YES	NO	winter	11	lorazpam	13	live	High sch	52	self emp	Addictio	YES	NO	NO	NO
	1400	male	Not insu	Married	3.5	Urban	low	YES	NO	spring	12	TCA	6	dead	High sch	48	employee	Economic	YES	NO	NO	NO
	1400	female	Not insu	Married	2.5	Rura	low	NO	NO	summer	13	TCA	15	live	Diploma	46	employee	Addictio	YES	NO	NO	NO
	1400	female	Social S	Widowed	2	Rura	miled	NO	NO	autum	14	lorazpam	13	live	Diploma	60	employee	Failure	YES	NO	NO	NO
	1400	female	General	Married	2	Rura	low	NO	NO	autum	15	lorazpam	10	live	High sch	52	employee	Failure	NO	NO	NO	NO
	1400	female	Not insu	Married	2.5	Urban	low	NO	NO	autum	16	lorazpam	6	live	High sch	57	non job	Familial	NO	NO	NO	NO
	1400	male	Not insu	Single	2.5	Urban	miled	YES	NO	spring	17	tramadol	10	live	Primary	48	employee	Addictio	NO	NO	NO	NO
	1400	male	Others	Widowed	3	Rura	low	NO	NO	summer	18	detergen	15	live	High sch	43	self emp	Others	YES	NO	NO	NO
	1400	male	Not insu	Single	3.5	Rura	miled	NO	NO	autum	19	TCA	15	live	High sch	35	non job	Addictio	YES	NO	NO	NO
	1400	male	Not insu	Single	4	Rura	miled	YES	NO	autum	20	lorazpam	13	live	Primary	36	non job	Failure	YES	NO	NO	NO
	1400	male	Iran Hea	Single	4	Urban	high	NO	NO	autum	21	lorazpam	10	live	Diploma	34	employee	Failure	YES	YES	NO	NO
	1400	male	Social S	Single	1.55	Urban	high	NO	NO	winter	22	lorazpam	6	live	Primary	35	employee	Failure	YES	NO	NO	NO
	1400	male	Social S	Single	1	Urban	miled	YES	NO	winter	23	opium	10	live	High sch	36	employee	Addictio	YES	NO	NO	NO
	1400	male	Iran Hea	Single	2.5	Rura	high	YES	NO	spring	24	pedistum	9	live	High sch	46	self emp	Economic	NO	YES	NO	NO
	1400	male	Not insu	Married	2	Urban	miled	YES	NO	summer	1	opium	12	live	Primary	45	employee	Mental d	YES	NO	NO	NO
	1400	female	Iran Hea	Single	4	Urban	high	NO	NO	autum	2	lorazpam	9	live	Diploma	34	employee	Failure	YES	NO	NO	NO
	1400	male	Social S	Single	1.55	Urban	high	YES	NO	autum	3	lorazpam	9	live	Primary	35	employee	Failure	NO	YES	NO	NO
	1400	male	Social S	Single	1	Urban	miled	YES	NO	autum	18	javel wa	15	live	High sch	36	employee	Others	NO	YES	NO	NO
	1400	male	Iran Hea	Single	2.5	Rura	high	YES	NO	winter	19	pedistum	15	live	High sch	46	self emp	Familial	YES	YES	NO	NO
	1400	female	Not insu	Married	2	Urban	miled	NO	NO	winter	20	opium	13	live	Primary	45	employee	Addictio	YES	NO	NO	NO
	1400	male	Not insu	Single	5	Rura	low	YES	NO	spring	21	آمفت	10	live	High sch	48	non job	Economic	YES	NO	NO	NO
	1400	male	Not insu	Widowed	4	Urban	low	YES	NO	spring	22	TCA	6	dead	High sch	49	employee	Addictio	NO	YES	NO	NO
	1400	female	Not insu	Divorced	7	Rura	low	NO	NO	summer	23	آمفت	10	live	High sch	74	employee	Economic	NO	YES	NO	NO
	1400	female	Not insu	Married	6	Rura	low	NO	NO	autum	10	TCA	9	dead	Primary	75	non job	Familial	YES	YES	NO	NO
	1400	male	Iran Hea	Single	4	Rura	high	YES	NO	autum	11	lorazpam	12	live	Primary	65	employee	Failure	YES	NO	NO	NO
	1400	male	Social S	Widowed	3	Rura	low	YES	NO	autum	12	detergen	15	live	High sch	69	retired	Others	YES	YES	NO	NO
	1400	male	Social S	Divorced	2	Rura	miled	YES	NO	winter	13	lorazpam	15	live	Primary	56	retired	Mental d	NO	NO	NO	NO
	1400	male	Iran Hea	Single	1.5	Urban	low	YES	NO	spring	14	lorazpam	13	live	Diploma	58	retired	Addictio	NO	NO	NO	NO
	1400	male	Others	Widowed	3	Rura	low	YES	NO	summer	15	آمفت	10	live	High sch	43	self emp	Economic	NO	YES	NO	NO
	1400	female	Not insu	Single	3.5	Rura	miled	NO	NO	autum	16	TCA	6	live	High sch	35	non job	Addictio	YES	NO	NO	NO
	1400	female	Not insu	Single	4	Rura	miled	NO	NO	autum	17	lorazpam	10	live	Primary	36	non job	Economic	YES	NO	NO	YES
	1400	male	Iran Hea	Single	4	Urban	high	YES	NO	autum	18	TCA	5	live	Diploma	34	employee	Failure	YES	YES	NO	YES
	1400	male	Social S	Single	1.55	Urban	high	YES	NO	spring	19	lorazpam	15	live	Primary	35	employee	Failure	NO	NO	NO	YES
	1400	male	Social S	Single	1	Urban	miled	YES	NO	summer	20	opium	13	live	High sch	36	employee	Addictio	YES	NO	NO	YES
	1400	male	Iran Hea	Single	2.5	Rura	high	NO	NO	autum	21	pedistum	10	live	High sch	46	self emp	Economic	YES	NO	NO	NO
	1400	male	Not insu	Married	2	Urban	miled	NO	NO	autum	11	opium	6	live	Primary	45	employee	Addictio	YES	YES	NO	NO
	1400	male	Not insu	Single	3	Rura	low	YES	NO	autum	12	alchol	10	live	Primary	18	non job	Falling	NO	NO	NO	NO
	1400	male	Not insu	Widowed	2.5	Rura	low	YES	NO	winter	13	lorazpam	9	live	Primary	55	employee	Failure	YES	NO	YES	YES
	1400	male	Not insu	Single	2	Rura	low	YES	NO	winter	14	javel wa	15	live	Primary	46	employee	Others	NO	NO	NO	YES
	1400	female	Not insu	Single	2.5	Rura	low	NO	NO	spring	15	lorazpam	15	live	Primary	57	employee	Failure	NO	NO	YES	NO
	1400	female	Not insu	Divorced	4	Rura	low	NO	NO	summer	16	alchol	13	live	Primary	19	employee	Mental d	YES	NO	NO	NO
	1400	female	Iran Hea	Widowed	3	Urban	miled	NO	NO	autum	17	lorazpam	10	live	High sch	52	self emp	Familial	YES	NO	YES	NO
	1400	male	Not insu	Married	3.5	Urban	low	YES	NO	autum	18	آمفت	6	dead	High sch	67	employee	Addictio	YES	NO	NO	NO
	1400	male	Not insu	Married	2.5	Rura	low	YES	NO	autum	19	detergen	15	live	Diploma	46	employee	Others	YES	NO	NO	NO
	1400	male	Social S	Widowed	2	Rura	miled	YES	NO	winter	20	lorazpam	13	live	Diploma	60	employee	Addictio	YES	YES	NO	YES
	1400	male	Not insu	Divorced	1	Rura	low	YES	NO	winter	21	آمفت	10	live	Diploma	49	employee	Familial	YES	NO	YES	NO
	1400	male	Iran Hea	Divorced	1.5	Rura	low	YES	NO	spring	22	TCA	6	live	High sch	50	self emp	Addictio	NO	NO	NO	NO
	1400	male	Not insu	Widowed	3	Urban	miled	YES	NO	spring	23	methadon	10	live	High sch	80	non job	Economic	NO	NO	NO	NO
	1400	male	Not insu	Widowed	3	Rura	low	NO	NO	summer	12	methadon	9	live	High sch	54	employee	Familial	YES	NO	NO	NO
	1400	male	Not insu	Single	2	Rura	miled	NO	NO	autum	13	opium	12	live	High sch	51	employee	Addictio	YES	NO	NO	NO
	1400	male	General	Married	2	Rura	low	YES	NO	autum	18	lorazpam	9	live	High sch	52	employee	Familial	YES	NO	NO	NO
	1400	female	Not insu	Married	2.5	Urban	low	NO	NO	autum	19	lorazpam	11	live	High sch	57	non job	Addictio	YES	NO	NO	NO
	1400	male	Not insu	Single	2.5	Urban	miled	YES	NO	winter	20	alminium	3	dead	Primary	67	employee	Mental d	YES	YES	NO	NO
	1400	male	Others	Widowed	3	Rura	low	YES	NO	spring	21	آمفت	15	live	High sch	43	self emp	Addictio	YES	NO	NO	NO
	1400	male	Not insu	Single	3.5	Rura	miled	YES	NO	summer	22	TCA	6	dead	High sch	35	non job	Economic	YES	NO	NO	NO
	1400	female	Not insu	Single	4	Rura	miled	NO	NO	autum	23	lorazpam	10	live	Primary	45	non job	Familial	YES	NO	NO	NO
	1400	male	Iran Hea	Single	4	Urban	high	YES	NO	autum	20	detergen	15	live	Diploma	34	employee	Others	YES	NO	NO	NO
	1400	male	Social S	Single	1.55	Urban	high	YES	NO	autum	21	lorazpam	12	live	Primary	55	employee	Failure	NO	NO	NO	NO
	1400	female	Social S	Single	1	Urban	miled	NO	NO	spring	22	opium	10	live	High sch	36	employee	Addictio	NO	NO	NO	NO
	1400	female	Iran Hea	Single	2.5	Rura	high	NO	NO	summer	11	pedistum	8	live	High sch	46	self emp	Economic	NO	NO	NO	NO
	1400	male	Not insu	Married	2	Urban	miled	YES	NO	autum	12	opium	5	dead	Primary	57	employee	Addictio	YES	NO	NO	NO
	1400	male	Not insu	Single	3	Rura	low	YES	NO	autum	13	alchol	14	live	Primary	19	non job	Falling	YES	NO	NO	NO
	1400	male	Not insu	Widowed	2.5	Rura	low	YES	NO	autum	14	lorazpam	12	live	Primary	55	employee	Mental d	YES	NO	NO	NO
	1400	male	Not insu	Single	2	Rura	low	YES	NO	winter	15	javel wa	15	live	Primary	46	employee	Others	YES	NO	NO	NO
	1400	male	Not insu	Single	2.5	Rura	low	YES	NO	winter	16	lorazpam	12	live	Primary	71	employee	Failure	YES	NO	NO	NO
	1400	female	Not insu	Divorced	4	Rura	low	NO	NO	spring	17	alchol	10	live	Primary	20	employee	Falling	YES	NO	NO	NO
	1400	female	Iran Hea	Widowed	3	Urban	miled	NO	NO	summer	18	lorazpam	8	live	High sch	52	self emp	Familial	NO	NO	NO	NO
	1400	male	Not insu	Married	3.5	Urban	low	YES	NO	autum	19	آمفت	5	live	High sch	48	employee	Addictio	YES	NO	NO	YES
	1400	male	Not insu	Married	2.5	Rura	low	NO	NO	autum	20	TCA	14	live	Diploma	46	employee	Economic	YES	YES	NO	YES
	1400	male	Social S	Widowed	2	Rura	miled	NO	NO	autum	22	lorazpam	12	live	Diploma	60	employee	Addictio	YES	NO	NO	NO
	1400	male	General	Married	2	Rura	low	YES	NO	winter	23	lorazpam	10	live	High sch	52	employee	Economic	YES	NO	NO	NO
	1400	male	Not insu	Married	2.5	Urban	low	YES	NO	winter	11	lorazpam	8	live	High sch	57	non job	Failure	NO	YES	NO	YES
	1400	male	Not insu	Single	2.5	Urban	miled	YES	NO	spring	12	tramadol	9	live	Primary	48	employee	Familial	YES	NO	NO	YES
	1400	male	Others	Widowed	3	Rura	low	YES	NO	spring	13	detergen	15	live	High sch	43	self emp	Mental d	YES	NO	YES	NO
	1400	male	Not insu	Single	3.5	Rura	miled	YES	NO	summer	14	TCA	6	dead	High sch	67	non job	Economic	NO	YES	NO	YES
	1400	female	Not insu	Single	4	Rura	miled	NO	NO	autum	15	lorazpam	10	live	Primary	89	non job	Addictio	NO	YES	NO	NO
	1400	male	Iran Hea	Single	4	Urban	high	YES	NO	autum	16	TCA	5	live	Diploma	34	employee	Economic	YES	YES	NO	NO
	1400	male	Social S	Single	1.55	Urban	high	YES	NO	autum	17	lorazpam	12	live	Primary	45	employee	Familial	YES	NO	NO	NO
	1400	female	Social S	Single	1	Urban	miled	NO	NO	winter	18	opium	10	live	High sch	56	employee	Addictio	YES	NO	NO	NO
	1400	female	Iran Hea	Single	2.5	Rura	high	NO	NO	spring	19	alminium	3	dead	High sch	46	self emp	Economic	YES	NO	NO	NO
	1400	male	Not insu	Married	2	Urban	miled	YES	NO	summer	20	opium	12	live	Primary	45	employee	Addictio	YES	NO	NO	NO
	1400	male	Iran Hea	Single	4	Urban	high	YES	NO	autum	18	lorazpam	10	live	Diploma	34	employee	Failure	YES	NO	NO	NO
	1400	male	Social S	Single	1.55	Urban	high	YES	NO	autum	19	lorazpam	8	live	Primary	35	employee	Failure	NO	NO	NO	NO
	1400	male	Social S	Single	1	Urban	miled	YES	NO	autum	20	opium	5	dead	High sch	36	employee	Addictio	NO	NO	NO	NO
	1400	male	Iran Hea	Single	2.5	Rura	high	YES	NO	spring	21	pedistum	14	live	High sch	46	self emp	Economic	NO	NO	NO	NO
	1400	male	Not insu	Married	2	Urban	miled	YES	NO	summer	22	opium	12	live	Primary	45	employee	Familial	YES	NO	NO	NO
	1400	male	Not insu	Single	5	Rura	low	NO	NO	autum	23	آمفت	10	live	High sch	48	non job	Addictio	YES	NO	NO	NO
	1400	male	Not insu	Widowed	4	Urban	low	NO	NO	autum	3	javel wa	15	live	High sch	49	employee	Others	YES	NO	NO	NO
	1400	male	Not insu	Divorced	7	Rura	low	YES	NO	autum	4	آمفت	12	live	High sch	74	employee	Addictio	YES	YES	NO	NO
	1400	female	Not insu	Married	6	Rura	low	NO	NO	winter	5	TCA	10	live	Primary	75	non job	Economic	YES	NO	NO	NO
	1400	male	Iran Hea	Single	4	Rura	high	YES	NO	winter	6	lorazpam	8	live	Primary	65	employee	Familial	YES	NO	NO	NO
	1400	male	Social S	Widowed	3	Rura	low	YES	NO	spring	7	lorazpam	5	dead	High sch	69	retired	Failure	NO	YES	YES	NO
	1400	male	Social S	Divorced	2	Rura	miled	YES	NO	summer	8	detergen	15	live	Primary	56	retired	Others	YES	NO	NO	NO
	1400	female	Iran Hea	Single	1.5	Urban	low	NO	NO	autum	9	lorazpam	12	live	Diploma	58	retired	Mental d	YES	NO	NO	NO
	1400	male	Not insu	Widowed	0.5	Rura	low	YES	NO	autum	10	lorazpam	10	live	Primary	69	employee	Failure	NO	YES	NO	NO
	1400	male	Not insu	Divorced	6	Rura	miled	YES	NO	autum	11	alchol	8	live	Diploma	19	self emp	Falling	NO	YES	NO	NO
	1400	female	Not insu	Widowed	3	Rura	miled	NO	NO	winter	12	alchol	5	live	Primary	20	non job	Falling	YES	YES	NO	NO
	1400	female	Not insu	Widowed	1	Rura	miled	NO	NO	winter	13	lorazpam	14	live	High sch	55	non job	Failure	YES	NO	NO	NO
	1400	male	Not insu	Single	2	Urban	low	YES	NO	spring	14	lorazpam	12	live	Primary	54	employee	Failure	YES	NO	NO	NO
	1400	male	Not insu	Divorced	2.5	Rura	low	YES	NO	spring	15	alchol	10	live	High sch	21	employee	Falling	NO	YES	NO	NO
	1400	male	Iran Hea	Married	2.5	Rura	low	YES	NO	summer	16	opium	8	live	Diploma	37	self emp	Familial	NO	YES	NO	NO
	1400	male	Social S	Married	2	Rura	high	YES	NO	autum	18	alminium	3	dead	Diploma	39	self emp	Addictio	YES	YES	NO	NO
	1400	male	Not insu	Married	3	Rura	low	YES	NO	autum	19	TCA	12	live	Primary	54	employee	Economic	YES	NO	NO	NO
	1400	female	Iran Hea	Single	3	Urban	low	NO	NO	autum	20	tramadol	10	live	High sch	45	self emp	Addictio	YES	YES	NO	NO
	1400	female	Iran Hea	Widowed	4	Rura	low	NO	NO	winter	21	TCA	5	dead	Primary	46	self emp	Economic	NO	NO	NO	NO
	1400	male	Not insu	Divorced	5	Rura	miled	YES	NO	spring	22	lorazpam	12	live	Primary	65	non job	Failure	NO	NO	NO	NO
	1400	male	Not insu	Single	2	Urban	low	YES	NO	summer	23	lorazpam	10	live	Primary	54	self emp	Failure	NO	YES	NO	NO
	1400	male	Not insu	Divorced	2.5	Rura	low	YES	NO	autum	23	javel wa	15	live	High sch	43	self emp	Others	YES	NO	NO	NO
	1400	male	Iran Hea	Married	2.5	Rura	low	YES	NO	autum	24	opium	12	live	Diploma	37	self emp	Mental d	YES	NO	YES	YES
	1400	male	Social S	Married	2	Rura	high	YES	NO	autum	1	آمفت	10	live	Diploma	39	self emp	Economic	YES	YES	NO	YES
	1400	male	Not insu	Married	3	Rura	low	NO	NO	spring	2	TCA	6	dead	Primary	54	employee	Addictio	NO	NO	NO	YES
	1400	male	Iran Hea	Single	3	Urban	low	NO	NO	summer	3	detergen	15	live	High sch	45	self emp	Others	YES	NO	NO	NO
	1400	male	Iran Hea	Widowed	4	Rura	low	YES	NO	autum	4	alchol	12	live	Primary	20	self emp	Falling	NO	YES	NO	YES
	1400	female	Not insu	Divorced	5	Rura	miled	NO	NO	autum	5	lorazpam	10	live	Primary	65	non job	Failure	YES	NO	NO	YES
	1400	male	Not insu	Single	3	Rura	low	YES	NO	autum	18	alchol	8	live	Primary	20	non job	Falling	YES	NO	NO	NO
	1400	male	Not insu	Widowed	2.5	Rura	low	YES	NO	winter	19	lorazpam	5	live	Primary	55	self emp	Failure	NO	YES	NO	YES
	1400	female	Not insu	Single	2	Rura	low	NO	NO	winter	20	lorazpam	14	live	Primary	46	self emp	Failure	NO	YES	NO	NO
	1400	female	Not insu	Single	2.5	Rura	low	NO	NO	spring	21	alminium	3	dead	Primary	57	self emp	Failure	YES	YES	NO	NO
	1400	female	Not insu	Divorced	4	Rura	low	NO	NO	summer	22	alchol	12	live	Primary	55	non job	Familial	YES	NO	NO	NO
	1400	male	Iran Hea	Widowed	3	Urban	miled	YES	NO	autum	23	lorazpam	10	live	High sch	52	self emp	Addictio	YES	NO	NO	NO
	1400	male	Not insu	Married	3.5	Urban	low	YES	NO	autum	12	آمفت	8	live	High sch	48	self emp	Economic	YES	NO	NO	NO
	1400	male	Not insu	Married	2.5	Rura	low	YES	NO	autum	13	TCA	5	dead	Diploma	46	self emp	Mental d	YES	NO	NO	NO
	1400	male	Social S	Widowed	2	Rura	miled	YES	NO	winter	14	lorazpam	14	live	Diploma	60	self emp	Familial	YES	NO	NO	NO
	1400	male	Not insu	Divorced	1	Rura	low	YES	NO	winter	15	detergen	15	live	Diploma	49	non job	Others	NO	NO	NO	NO
	1400	male	Iran Hea	Divorced	1.5	Rura	low	YES	NO	spring	16	TCA	6	dead	High sch	50	self emp	Economic	NO	NO	NO	NO
	1400	male	Not insu	Widowed	3	Urban	miled	YES	NO	spring	17	methadon	10	live	High sch	55	non job	Addictio	NO	NO	NO	NO
	1400	male	Not insu	Widowed	3	Rura	low	YES	NO	summer	18	methadon	8	live	High sch	54	self emp	Economic	YES	NO	NO	NO
	1400	male	Not insu	Single	2	Rura	miled	YES	NO	autum	19	opium	5	dead	High sch	51	self emp	Familial	YES	NO	NO	NO
	1400	female	General	Married	2	Rura	low	NO	NO	autum	20	javel wa	15	live	High sch	52	self emp	Others	YES	NO	NO	NO
	1400	male	Not insu	Married	2.5	Urban	low	YES	NO	autum	21	lorazpam	12	live	High sch	57	non job	Failure	YES	NO	NO	NO
	1400	male	Not insu	Single	2.5	Urban	miled	NO	NO	winter	22	tramadol	10	live	Primary	48	employee	Familial	YES	NO	NO	NO
	1400	male	Others	Widowed	3	Rura	low	NO	NO	spring	18	آمفت	8	live	High sch	43	self emp	Addictio	YES	NO	NO	NO
	1400	female	Not insu	Single	3.5	Rura	miled	NO	NO	summer	19	TCA	5	live	High sch	35	non job	Economic	NO	NO	NO	NO
	1400	male	Not insu	Single	4	Rura	miled	YES	NO	autum	20	alminium	3	dead	Primary	36	non job	Addictio	YES	NO	NO	NO
	1400	male	Iran Hea	Single	4	Urban	high	YES	NO	autum	21	lorazpam	12	live	Diploma	34	self emp	Economic	YES	YES	NO	NO
	1400	female	Social S	Single	1.55	Urban	high	NO	NO	autum	11	lorazpam	10	live	Primary	35	non job	Familial	YES	NO	NO	NO
	1400	female	Social S	Single	1	Urban	miled	NO	NO	spring	12	opium	8	live	High sch	36	employee	Mental d	YES	NO	NO	NO
	1400	male	Iran Hea	Single	2.5	Rura	high	YES	NO	summer	13	pedistum	5	dead	High sch	46	self emp	Economic	NO	YES	NO	NO
	1400	male	Not insu	Married	2	Urban	miled	YES	NO	autum	14	opium	14	live	Primary	45	employee	Addictio	YES	NO	NO	NO
	1400	male	Not insu	Single	3	Rura	low	YES	NO	autum	15	alchol	12	live	Primary	19	self emp	Falling	YES	NO	NO	NO
	1400	male	Not insu	Widowed	2.5	Rura	low	YES	NO	autum	16	lorazpam	10	live	Primary	55	non job	Failure	NO	YES	NO	NO
	1400	male	Not insu	Single	2	Rura	low	YES	NO	winter	17	lorazpam	8	live	Primary	46	non job	Failure	NO	YES	NO	NO
	1400	female	Not insu	Single	2.5	Rura	low	NO	NO	winter	18	lorazpam	9	live	Primary	57	self emp	Failure	YES	YES	NO	NO
	1400	female	Not insu	Divorced	4	Rura	low	NO	NO	spring	19	detergen	15	live	Primary	18	non job	Others	YES	NO	NO	NO
	1400	male	Iran Hea	Widowed	3	Urban	miled	YES	NO	summer	20	lorazpam	12	live	High sch	52	self emp	Familial	YES	NO	NO	NO
	1400	male	Not insu	Married	3.5	Urban	low	YES	NO	autum	21	آمفت	10	live	High sch	48	self emp	Addictio	YES	NO	NO	NO
	1400	male	Not insu	Married	2.5	Rura	low	YES	NO	autum	22	TCA	6	dead	Diploma	46	self emp	Economic	YES	NO	NO	NO
	1400	male	Social S	Widowed	2	Rura	miled	YES	NO	autum	15	lorazpam	5	live	Diploma	60	self emp	Addictio	YES	NO	NO	NO
	1400	male	General	Married	2	Rura	low	YES	NO	winter	16	lorazpam	14	live	High sch	52	non job	Failure	NO	NO	NO	NO
	1400	male	Not insu	Married	2.5	Urban	low	NO	NO	winter	17	lorazpam	12	live	High sch	57	non job	Mental d	NO	NO	NO	NO
	1400	male	Not insu	Single	2.5	Urban	miled	NO	NO	spring	18	tramadol	10	live	Primary	48	employee	Addictio	NO	NO	NO	NO
	1400	male	Others	Widowed	3	Rura	low	YES	NO	spring	19	آمفت	8	live	High sch	43	self emp	Economic	YES	NO	NO	NO
	1400	female	Not insu	Single	3.5	Rura	miled	NO	NO	summer	20	javel wa	15	live	High sch	35	non job	Others	YES	NO	NO	NO
	1400	male	Not insu	Single	4	Rura	miled	YES	NO	autum	21	lorazpam	12	live	Primary	36	non job	Economic	YES	NO	NO	NO
	1400	male	Iran Hea	Single	4	Urban	high	YES	NO	autum	18	lorazpam	10	live	Diploma	34	self emp	Familial	YES	YES	NO	NO
	1400	female	Social S	Single	1.55	Urban	high	NO	NO	autum	19	lorazpam	8	live	Primary	35	self emp	Failure	YES	NO	NO	NO
	1400	female	Social S	Single	1	Urban	miled	NO	NO	winter	20	opium	5	dead	High sch	36	self emp	Addictio	YES	NO	NO	NO
	1400	female	Iran Hea	Single	2.5	Rura	high	NO	NO	spring	21	TCA	5	live	High sch	46	self emp	Economic	NO	YES	NO	NO
	1400	male	Not insu	Married	2	Urban	miled	YES	NO	summer	22	opium	12	live	Primary	45	self emp	Addictio	YES	NO	NO	NO
	1400	male	Iran Hea	Single	4	Urban	high	YES	NO	autum	23	lorazpam	10	live	Diploma	34	self emp	Failure	YES	NO	NO	NO
	1400	male	Social S	Single	1.55	Urban	high	YES	NO	autum	4	lorazpam	8	live	Primary	35	non job	Failure	NO	YES	NO	NO
	1400	male	Social S	Single	1	Urban	miled	YES	NO	autum	5	opium	5	live	High sch	36	self emp	Addictio	NO	YES	NO	NO
	1400	male	Iran Hea	Single	2.5	Rura	high	YES	NO	spring	6	alminium	3	dead	High sch	46	self emp	Familial	YES	YES	NO	NO
	1400	male	Not insu	Married	2	Urban	miled	YES	NO	summer	7	opium	12	live	Primary	45	self emp	Addictio	YES	NO	NO	NO
	1400	male	Not insu	Single	5	Rura	low	YES	NO	autum	8	آمفت	10	live	High sch	48	self emp	Mental d	YES	NO	NO	NO
	1400	male	Not insu	Widowed	4	Urban	low	YES	NO	autum	9	TCA	6	dead	High sch	49	self emp	Addictio	NO	YES	NO	NO
	1400	male	Not insu	Divorced	7	Rura	low	YES	NO	autum	10	آمفت	5	live	High sch	74	non job	Economic	NO	YES	NO	NO
	1400	female	Not insu	Married	6	Rura	low	NO	NO	winter	11	TCA	14	live	Primary	75	self emp	Familial	YES	YES	NO	NO
	1400	male	Iran Hea	Single	4	Rura	high	YES	NO	winter	12	lorazpam	12	live	Primary	65	employee	Failure	YES	NO	NO	NO
	1400	male	Social S	Widowed	3	Rura	low	NO	NO	spring	13	detergen	15	live	High sch	69	retired	Others	YES	YES	NO	NO
	1400	male	Social S	Divorced	2	Rura	miled	NO	NO	summer	14	lorazpam	14	live	Primary	56	retired	Failure	NO	NO	NO	NO
	1400	female	Iran Hea	Single	1.5	Urban	low	NO	NO	autum	15	lorazpam	11	live	Diploma	58	retired	Failure	NO	NO	NO	NO
	1400	male	Iran Hea	Single	4	Urban	high	YES	NO	autum	16	lorazpam	10	live	Diploma	34	self emp	Failure	NO	YES	NO	NO
	1400	male	Social S	Single	1.55	Urban	high	YES	NO	autum	17	lorazpam	8	dead	Primary	35	self emp	Failure	YES	NO	NO	NO
	1400	female	Social S	Single	1	Urban	miled	NO	NO	winter	18	javel wa	15	live	High sch	36	non job	Others	YES	NO	NO	YES
	1400	female	Iran Hea	Single	2.5	Rura	high	NO	NO	winter	19	pedistum	13	live	High sch	46	self emp	Addictio	YES	YES	NO	YES
	1400	male	Not insu	Married	2	Urban	miled	YES	NO	spring	20	opium	12	live	Primary	45	employee	Economic	NO	NO	NO	YES
	1400	male	Not insu	Single	5	Rura	low	YES	NO	spring	21	آمفت	10	live	High sch	48	non job	Mental d	YES	NO	NO	YES
	1400	male	Not insu	Widowed	4	Urban	low	YES	NO	summer	18	TCA	8	live	High sch	49	self emp	Familial	YES	NO	NO	NO
	1400	male	Not insu	Divorced	7	Rura	low	YES	NO	autum	19	TCA	5	live	High sch	74	self emp	Addictio	YES	YES	NO	NO
	1400	male	Not insu	Married	6	Rura	low	YES	NO	autum	20	TCA	14	live	Primary	75	non job	Economic	NO	NO	NO	NO
	1400	female	Iran Hea	Single	4	Rura	high	NO	NO	autum	21	lorazpam	12	live	Primary	65	employee	Addictio	YES	NO	YES	YES
	1400	female	Social S	Widowed	3	Rura	low	NO	NO	winter	22	lorazpam	10	live	High sch	69	self emp	Economic	NO	NO	NO	YES
	1400	male	Social S	Divorced	2	Rura	miled	YES	NO	spring	23	lorazpam	8	live	Primary	56	self emp	Failure	NO	NO	NO	NO
	1400	male	Iran Hea	Single	1.5	Urban	low	YES	NO	summer	4	lorazpam	9	dead	Diploma	58	non job	Failure	YES	NO	NO	NO
	1400	male	Not insu	Widowed	0.5	Rura	low	YES	NO	autum	5	lorazpam	10	live	Primary	69	self emp	Failure	YES	NO	YES	NO
	1400	male	Not insu	Divorced	6	Rura	miled	YES	NO	autum	6	alchol	9	live	Diploma	19	self emp	Falling	YES	NO	NO	NO
	1400	male	Not insu	Widowed	3	Rura	miled	YES	NO	autum	7	detergen	15	live	Primary	18	non job	Others	YES	NO	YES	NO
	1400	male	Not insu	Widowed	1	Rura	miled	YES	NO	spring	8	lorazpam	14	live	High sch	55	non job	Mental d	YES	YES	NO	NO
	1400	male	Not insu	Single	2	Urban	low	NO	NO	summer	9	lorazpam	12	live	Primary	54	employee	Failure	YES	NO	NO	NO
	1400	male	Not insu	Divorced	2.5	Rura	low	NO	NO	autum	10	TCA	5	live	High sch	19	employee	Falling	NO	NO	NO	NO
	1400	female	Iran Hea	Married	2.5	Rura	low	NO	NO	autum	11	opium	14	live	Diploma	37	self emp	Familial	NO	NO	YES	NO
	1400	male	Social S	Married	2	Rura	high	YES	NO	autum	12	آمفت	12	live	Diploma	63	self emp	Addictio	YES	NO	NO	NO
	1400	male	Not insu	Married	3	Rura	low	YES	NO	winter	13	TCA	10	live	Primary	54	employee	Economic	YES	NO	NO	NO
	1400	female	Iran Hea	Single	3	Urban	low	NO	NO	winter	14	tramadol	8	live	High sch	45	self emp	Addictio	YES	NO	NO	NO
	1400	female	Iran Hea	Widowed	4	Rura	low	NO	NO	spring	15	alchol	9	live	Primary	46	self emp	Economic	YES	NO	NO	NO
	1400	female	Not insu	Divorced	5	Rura	miled	NO	NO	summer	16	lorazpam	10	live	Primary	65	non job	Familial	YES	YES	NO	NO
	1400	male	Not insu	Single	2	Urban	low	YES	NO	autum	17	lorazpam	9	live	Primary	54	self emp	Failure	YES	NO	NO	NO
	1400	male	Not insu	Divorced	2.5	Rura	low	YES	NO	autum	18	javel wa	15	live	High sch	43	self emp	Others	YES	NO	NO	NO
	1400	male	Iran Hea	Married	2.5	Rura	low	YES	NO	autum	11	opium	14	live	Diploma	57	non job	Addictio	YES	NO	NO	NO
	1400	male	Social S	Married	2	Rura	high	YES	NO	winter	12	آمفت	12	live	Diploma	39	non job	Economic	YES	NO	NO	NO
	1400	male	Not insu	Married	3	Rura	low	YES	NO	winter	13	TCA	6	dead	Primary	54	self emp	Addictio	NO	NO	NO	NO
	1400	male	Iran Hea	Single	3	Urban	low	YES	NO	spring	14	tramadol	8	live	High sch	45	self emp	Economic	NO	NO	NO	NO
	1400	male	Iran Hea	Widowed	4	Rura	low	NO	NO	spring	15	alchol	9	live	Primary	46	self emp	Familial	NO	NO	NO	NO
	1400	male	Not insu	Divorced	5	Rura	miled	NO	NO	summer	16	lorazpam	10	live	Primary	65	non job	Mental d	YES	NO	NO	NO
	1400	male	Not insu	Single	2.5	Rura	low	YES	NO	autum	17	lorazpam	9	live	Primary	57	non job	Failure	YES	NO	NO	NO
	1400	female	Not insu	Divorced	4	Rura	low	NO	NO	autum	18	detergen	15	live	Primary	19	self emp	Others	YES	NO	NO	NO
	1400	male	Iran Hea	Widowed	3	Urban	miled	YES	NO	autum	19	lorazpam	8	live	High sch	52	non job	Familial	YES	NO	NO	YES
	1400	male	Not insu	Married	3.5	Urban	low	YES	NO	winter	20	آمفت	14	live	High sch	48	self emp	Addictio	YES	NO	NO	NO
	1400	male	Not insu	Married	2.5	Rura	low	YES	NO	spring	21	TCA	12	live	Diploma	46	self emp	Economic	YES	NO	NO	NO
	1400	female	Social S	Widowed	2	Rura	miled	NO	NO	summer	22	lorazpam	10	live	Diploma	60	self emp	Addictio	NO	NO	NO	NO
	1400	male	Not insu	Divorced	1	Rura	low	YES	NO	autum	23	آمفت	8	live	Diploma	49	non job	Economic	YES	NO	NO	YES
	1400	male	Iran Hea	Divorced	1.5	Rura	low	YES	NO	autum	3	TCA	9	live	High sch	50	non job	Familial	YES	YES	NO	YES
	1400	female	Not insu	Widowed	3	Urban	miled	NO	NO	autum	4	methadon	10	live	High sch	55	non job	Familial	YES	NO	NO	NO
	1400	female	Not insu	Widowed	3	Rura	low	NO	NO	spring	5	methadon	9	live	High sch	54	non job	Familial	YES	NO	NO	NO
	1400	male	Not insu	Single	2	Rura	miled	YES	NO	summer	6	opium	8	live	High sch	51	self emp	Mental d	NO	YES	NO	YES
	1400	male	General	Married	2	Rura	low	YES	NO	autum	7	lorazpam	5	live	High sch	52	non job	Familial	YES	NO	NO	YES
	1400	male	Not insu	Married	2.5	Urban	low	YES	NO	autum	8	lorazpam	8	live	High sch	57	non job	Addictio	YES	NO	NO	NO
	1400	male	Not insu	Single	2.5	Urban	miled	YES	NO	autum	9	tramadol	5	live	Primary	48	employee	Economic	NO	YES	NO	YES
	1400	male	Others	Widowed	3	Rura	low	YES	NO	winter	10	javel wa	15	live	High sch	43	self emp	Others	NO	YES	NO	NO
	1400	female	Not insu	Single	3.5	Rura	miled	NO	NO	winter	11	TCA	6	dead	High sch	35	non job	Economic	YES	YES	NO	NO
	1400	female	Not insu	Single	4	Rura	miled	NO	NO	spring	12	lorazpam	5	live	Primary	36	non job	Familial	YES	NO	NO	NO
	1400	male	Iran Hea	Single	4	Urban	high	YES	NO	summer	13	lorazpam	8	live	Diploma	34	self emp	Failure	YES	NO	NO	NO
	1400	male	Social S	Single	1.55	Urban	high	YES	NO	autum	14	lorazpam	5	live	Primary	35	non job	Failure	YES	NO	NO	NO
	1400	male	Social S	Single	1	Urban	miled	YES	NO	autum	15	opium	9	live	High sch	36	self emp	Addictio	YES	NO	NO	NO
	1400	male	Iran Hea	Single	2.5	Rura	high	YES	NO	autum	16	alminium	3	dead	High sch	46	self emp	Economic	YES	NO	NO	YES
	1400	male	Not insu	Married	2	Urban	miled	YES	NO	winter	17	opium	8	live	Primary	45	employee	Addictio	NO	NO	NO	YES
	1400	male	Not insu	Single	3	Rura	low	NO	NO	winter	18	alchol	5	dead	Primary	19	non job	Falling	NO	NO	NO	NO
	1400	male	Not insu	Widowed	2.5	Rura	low	NO	NO	spring	19	lorazpam	8	live	Primary	55	non job	Failure	NO	NO	NO	YES
	1400	male	Not insu	Single	2	Rura	low	YES	NO	spring	20	lorazpam	5	live	Primary	46	self emp	Failure	YES	NO	NO	NO
	1400	female	Not insu	Single	2.5	Rura	low	NO	NO	summer	21	lorazpam	9	live	Primary	57	non job	Familial	YES	NO	NO	NO
	1400	male	Not insu	Married	3.5	Urban	low	YES	NO	autum	18	alminium	3	dead	High sch	48	self emp	Mental d	YES	NO	NO	NO
	1400	male	Not insu	Married	2.5	Rura	low	YES	NO	autum	19	TCA	8	live	Diploma	46	employee	Economic	YES	YES	NO	NO
	1400	female	Social S	Widowed	2	Rura	miled	NO	NO	autum	20	lorazpam	5	live	Diploma	60	employee	Failure	YES	NO	NO	NO
	1400	female	General	Married	2	Rura	low	NO	NO	winter	21	lorazpam	8	live	High sch	52	employee	Failure	YES	NO	NO	NO
	1400	female	Not insu	Married	2.5	Urban	low	NO	NO	spring	22	lorazpam	5	live	High sch	57	non job	Familial	NO	YES	YES	NO
	1400	male	Not insu	Single	2.5	Urban	miled	YES	NO	summer	23	tramadol	9	live	Primary	48	employee	Addictio	YES	NO	NO	NO
	1400	male	Others	Widowed	3	Rura	low	YES	NO	autum	4	detergen	15	live	High sch	43	self emp	Others	YES	NO	NO	NO
	1400	male	Not insu	Single	3.5	Rura	miled	YES	NO	autum	18	alminium	3	dead	High sch	35	non job	Addictio	NO	YES	NO	NO
	1400	male	Not insu	Single	4	Rura	miled	YES	NO	autum	19	lorazpam	9	live	Primary	36	non job	Economic	NO	YES	NO	NO
	1400	male	Iran Hea	Single	4	Urban	high	YES	NO	spring	20	TCA	6	dead	Diploma	34	employee	Failure	YES	YES	NO	NO
	1400	male	Social S	Single	1.55	Urban	high	YES	NO	summer	21	lorazpam	8	live	Primary	35	employee	Mental d	YES	NO	YES	NO
	1400	male	Social S	Single	1	Urban	miled	YES	NO	autum	22	opium	5	dead	High sch	36	employee	Addictio	YES	NO	NO	NO
	1400	male	Iran Hea	Single	2.5	Rura	high	NO	NO	autum	23	javel wa	15	live	High sch	46	self emp	Others	NO	YES	NO	NO
	1400	male	Not insu	Married	2	Urban	miled	NO	NO	autum	11	opium	8	live	Primary	45	employee	Addictio	NO	YES	NO	NO
	1400	female	Not insu	Single	3	Rura	low	NO	NO	winter	12	alchol	5	live	Primary	19	non job	Falling	YES	YES	NO	NO
	1400	male	Not insu	Married	5	Rura	low	YES	NO	winter	13	lorazpam	12	live	Primary	74	non job	Familial	YES	NO	NO	NO
	1400	male	Not insu	Married	6	Rura	low	YES	NO	spring	14	lorazpam	5	live	Primary	55	non job	Addictio	YES	YES	NO	NO
	1400	male	Iran Hea	Married	4	Rura	low	YES	NO	summer	18	lorazpam	9	live	Diploma	65	self emp	Economic	NO	NO	NO	NO
	1400	female	Not insu	Single	4	Rura	low	NO	NO	autum	19	alminium	13	live	High sch	65	non job	Addictio	NO	NO	NO	NO
	1400	male	Not insu	Married	5	Rura	low	YES	NO	autum	20	lorazpam	8	live	Primary	56	self emp	Economic	NO	YES	NO	NO
	1400	male	Social S	Married	6	Rura	low	YES	NO	autum	21	alminium	12	live	Primary	55	self emp	Familial	YES	NO	NO	NO
	1400	female	Social S	Married	4	Urban	low	NO	NO	winter	22	acetamin	9	live	Primary	54	retired	Economic	YES	NO	NO	YES
	1400	female	Iran Hea	Single	5	Rura	miled	NO	NO	winter	23	acetamin	11	live	High sch	34	employee	Mental d	YES	YES	YES	YES
	1400	male	Not insu	Widowed	6	Rura	low	YES	NO	spring	21	detergen	15	live	Primary	25	employee	Others	NO	NO	YES	YES
	1400	male	Not insu	Married	4	Rura	low	YES	NO	winter	22	acetamin	8	live	High sch	29	non job	Unemploy	YES	NO	NO	NO
	1400	male	General	Married	4	Urban	low	YES	NO	spring	23	alminium	5	dead	Diploma	50	self emp	Mental d	NO	YES	NO	YES
	1399	male	Not insu	Widowed	5	Rura	low	YES	NO	summer	24	alminium	8	live	Primary	56	non job	Mental d	NO	YES	NO	NO
	1399	female	Social S	Married	6	Rura	high	NO	NO	autum	1	alminium	5	live	Primary	55	self emp	Mental d	YES	YES	NO	NO
	1399	female	Social S	Widowed	7	Rura	low	NO	NO	autum	2	TCA	6	dead	BSc	54	self emp	Familial	YES	NO	NO	NO
	1399	male	Not insu	Married	10	Rura	low	YES	NO	autum	3	acetamin	8	live	High sch	58	employee	Addictio	YES	YES	NO	NO
	1399	male	General	Divorced	9	Urban	low	YES	NO	spring	4	alminium	5	live	Diploma	59	non job	Economic	NO	NO	NO	NO
	1399	male	Not insu	Married	8	Urban	low	YES	NO	summer	18	acetamin	8	live	Primary	65	employee	Addictio	NO	NO	NO	NO
	1399	male	Not insu	Married	7	Urban	low	YES	NO	autum	19	آمفت	5	dead	Diploma	61	non job	Economic	NO	YES	NO	NO
	1399	male	Not insu	Married	6	Rura	miled	YES	NO	autum	20	javel wa	15	live	Primary	62	employee	Others	YES	NO	NO	NO
	1399	male	Social S	Single	5	Rura	low	YES	NO	autum	21	alminium	3	dead	High sch	63	self emp	Economic	YES	NO	YES	NO
	1399	male	Not insu	Married	4	Rura	low	YES	NO	winter	22	lorazpam	8	live	High sch	64	non job	Failure	YES	YES	YES	NO
	1399	male	Not insu	Married	3	Rura	low	YES	NO	winter	23	lorazpam	5	live	Primary	45	employee	Failure	NO	NO	YES	NO
	1399	male	Not insu	Married	2	Rura	low	YES	NO	spring	11	alminium	8	live	BSc	43	non job	Mental d	YES	NO	YES	NO
	1399	female	Not insu	Married	1	Rura	miled	NO	NO	summer	12	alminium	3	dead	Diploma	46	employee	Mental d	YES	NO	YES	NO
	1399	male	Not insu	Married	3	Urban	high	NO	NO	autum	13	alminium	8	live	Primary	49	non job	Mental d	YES	YES	YES	NO
	1399	male	Iran Hea	Divorced	3	Rura	high	NO	NO	autum	14	alminium	5	live	Primary	55	non job	Familial	NO	NO	NO	NO
	1399	male	Iran Hea	Married	4	Rura	miled	YES	NO	autum	15	alminium	8	live	Primary	50	self emp	Addictio	YES	NO	YES	NO
	1399	female	Iran Hea	Married	5	Urban	low	NO	NO	winter	16	alminium	5	live	High sch	51	non job	Economic	NO	NO	NO	NO
	1399	male	Iran Hea	Married	6	Rura	miled	YES	NO	winter	17	detergen	15	live	Primary	52	non job	Others	NO	NO	NO	NO
	1399	male	Not insu	Single	4	Rura	low	YES	NO	spring	18	acetamin	8	live	Primary	34	non job	Unemploy	YES	NO	NO	NO
	1399	female	Not insu	Married	5	Rura	low	NO	NO	spring	19	acetamin	5	live	Primary	25	self emp	Unemploy	YES	NO	YES	NO
	1399	female	Not insu	Married	6	Urban	low	NO	NO	summer	18	TCA	5	live	High sch	30	non job	Unemploy	YES	NO	NO	NO
	1399	male	Not insu	Married	7	Rura	miled	YES	NO	autum	19	lorazpam	8	live	High sch	46	non job	Failure	YES	NO	NO	NO
	1399	male	Not insu	Single	10	Rura	miled	YES	NO	autum	20	alchol	8	live	Primary	43	self emp	Familial	YES	YES	NO	NO
	1399	male	Social S	Widowed	11	Rura	miled	YES	NO	autum	21	tramadol	5	dead	High sch	41	self emp	Addictio	YES	NO	NO	NO
	1399	male	General	Married	2	Rura	low	YES	NO	winter	22	TCA	8	live	Primary	34	self emp	Economic	NO	NO	NO	NO
	1399	male	Social S	Single	3	Rura	low	YES	NO	spring	11	آمفت	8	live	Primary	38	self emp	Addictio	NO	NO	YES	NO
	1399	female	Not insu	Married	2	Urban	low	NO	NO	summer	12	TCA	6	dead	High sch	39	employee	Economic	YES	NO	NO	NO
	1399	female	Not insu	Married	4	Rura	low	NO	NO	autum	13	lorazpam	8	live	High sch	49	non job	Mental d	YES	NO	NO	NO
	1399	male	Iran Hea	Married	3	Rura	low	YES	NO	autum	14	alminium	8	live	High sch	48	self emp	Mental d	YES	NO	NO	NO
	1399	male	Not insu	Widowed	3	Rura	miled	YES	NO	autum	15	acetamin	5	live	Diploma	47	employee	Familial	YES	NO	NO	NO
	1399	male	Not insu	Divorced	5	Rura	high	YES	NO	spring	16	acetamin	8	live	High sch	45	employee	Addictio	YES	YES	NO	NO
	1399	male	Not insu	Married	1	Rura	high	NO	NO	summer	17	javel wa	15	live	Primary	57	non job	Others	YES	NO	NO	NO
	1399	male	Not insu	Widowed	6	Urban	miled	NO	NO	autum	18	acetamin	8	live	High sch	78	employee	Addictio	NO	NO	NO	NO
	1399	male	Not insu	Widowed	5	Rura	low	YES	NO	autum	19	acetamin	5	live	Primary	74	non job	Economic	NO	NO	NO	NO
	1399	male	Social S	Widowed	2	Rura	low	YES	NO	autum	20	alminium	8	live	Primary	76	self emp	Familial	NO	NO	NO	NO
	1399	male	Social S	Widowed	1	Rura	low	YES	NO	winter	21	detergen	15	live	BSc	69	non job	Others	YES	NO	NO	NO
	1399	female	General	Widowed	1	Rura	low	NO	NO	winter	22	lorazpam	10	live	Primary	64	non job	Familial	YES	NO	NO	NO
	1399	male	Iran Hea	Widowed	1	Urban	low	YES	NO	spring	23	TCA	5	dead	High sch	78	non job	Addictio	YES	NO	NO	NO
	1399	male	Iran Hea	Divorced	2	Rura	miled	YES	NO	summer	14	alminium	8	live	Primary	74	retired	Economic	YES	NO	NO	NO
	1399	female	Not insu	Married	5	Rura	low	NO	NO	autum	15	lorazpam	5	dead	Primary	74	non job	Addictio	YES	NO	NO	NO
	1399	female	Not insu	Married	6	Rura	low	NO	NO	autum	16	lorazpam	8	live	Primary	55	employee	Economic	YES	NO	NO	NO
	1399	female	Not insu	Single	3	Rura	low	NO	NO	autum	17	lorazpam	8	live	Primary	52	non job	Failure	NO	NO	NO	NO
	1399	female	Not insu	Widowed	2.5	Rura	low	NO	NO	winter	18	alminium	5	live	Primary	55	employee	Mental d	YES	NO	NO	NO
	1399	male	Not insu	Single	2	Rura	low	YES	NO	winter	19	lorazpam	8	live	Primary	46	employee	Failure	YES	YES	NO	NO
	1399	male	Not insu	Single	2.5	Rura	low	YES	NO	spring	20	alminium	5	live	Primary	57	employee	Mental d	YES	NO	YES	NO
	1399	male	Not insu	Divorced	4	Rura	low	YES	NO	winter	21	acetamin	9	live	Primary	30	employee	Mental d	YES	NO	YES	NO
	1399	male	Iran Hea	Widowed	3	Rura	low	YES	NO	spring	22	detergen	15	live	High sch	52	non job	Others	NO	YES	NO	NO
	1399	male	Not insu	Married	3.5	Urban	miled	YES	NO	summer	23	acetamin	8	live	High sch	48	self emp	Addictio	YES	NO	NO	NO
	1399	male	Not insu	Married	2.5	Urban	low	YES	NO	autum	1	acetamin	5	live	Diploma	46	non job	Economic	YES	NO	NO	NO
	1399	male	Social S	Widowed	2	Rura	low	YES	NO	autum	2	alminium	8	live	Diploma	60	non job	Addictio	NO	YES	NO	NO
	1399	male	Not insu	Divorced	1	Rura	miled	YES	NO	autum	3	alminium	8	live	Diploma	49	self emp	Economic	NO	YES	NO	NO
	1399	male	Iran Hea	Divorced	1.5	Rura	low	YES	NO	spring	4	alminium	5	live	High sch	50	non job	Familial	YES	YES	NO	NO
	1399	female	Not insu	Widowed	3	Rura	low	NO	NO	summer	5	acetamin	8	live	High sch	31	self emp	Unemploy	YES	NO	NO	NO
	1399	male	Not insu	Widowed	3	Urban	miled	YES	NO	autum	6	acetamin	5	live	High sch	32	non job	Unemploy	YES	NO	NO	NO
	1399	male	Not insu	Single	2	Rura	low	NO	NO	spring	7	alminium	9	live	High sch	51	non job	Mental d	YES	NO	NO	NO
	1399	male	General	Married	2	Rura	miled	NO	NO	summer	8	javel wa	15	live	High sch	29	self emp	Others	YES	NO	NO	NO
	1399	female	Not insu	Married	2.5	Rura	low	NO	NO	autum	9	آمفت	8	live	High sch	57	non job	Familial	YES	NO	NO	YES
	1399	male	Not insu	Single	2.5	Urban	low	YES	NO	autum	10	آمفت	5	dead	Primary	48	employee	Addictio	NO	NO	NO	YES
	1399	male	Others	Widowed	3	Urban	miled	YES	NO	autum	11	آمفت	8	live	High sch	52	self emp	Economic	YES	NO	NO	NO
	1399	female	Not insu	Single	3.5	Rura	low	NO	NO	winter	12	TCA	6	dead	High sch	35	non job	Addictio	YES	NO	NO	NO
	1399	female	Not insu	Single	4	Rura	miled	NO	NO	spring	13	lorazpam	8	live	Primary	52	non job	Economic	YES	NO	NO	YES
	1399	male	Iran Hea	Single	4	Rura	miled	YES	NO	summer	14	alminium	5	live	Diploma	34	non job	Familial	YES	YES	NO	YES
	1399	male	Social S	Single	1.55	Urban	high	YES	NO	autum	15	alminium	8	live	Primary	52	self emp	Economic	YES	NO	NO	NO
	1399	male	Social S	Single	1	Urban	high	YES	NO	autum	16	alminium	8	live	High sch	52	non job	Mental d	YES	NO	YES	NO
	1399	male	Iran Hea	Single	2.5	Urban	miled	YES	NO	autum	17	alminium	5	live	High sch	46	self emp	Mental d	NO	YES	YES	YES
	1399	male	Not insu	Married	2	Rura	high	YES	YES	spring	18	alminium	8	live	Primary	45	employee	Familial	YES	NO	NO	NO
	1399	female	Not insu	Single	3	Urban	miled	NO	NO	summer	19	alminium	5	live	Primary	52	non job	Addictio	YES	NO	NO	NO
	1399	female	Not insu	Widowed	2.5	Rura	low	NO	NO	autum	18	detergen	15	live	Primary	55	employee	Others	NO	YES	NO	NO
	1399	male	Not insu	Single	2	Rura	low	YES	NO	autum	19	acetamin	8	live	Primary	46	employee	Addictio	NO	YES	NO	NO
	1399	male	Not insu	Single	2.5	Rura	low	YES	NO	autum	20	acetamin	5	live	Primary	52	employee	Economic	YES	YES	NO	NO
	1399	male	Not insu	Divorced	4	Rura	low	YES	NO	winter	21	acetamin	8	live	Primary	31	employee	Unemploy	YES	NO	NO	NO
	1399	male	Iran Hea	Widowed	3	Rura	low	YES	NO	winter	22	lorazpam	5	live	High sch	52	self emp	Failure	YES	NO	NO	NO
	1399	male	Not insu	Married	3.5	Urban	miled	YES	NO	spring	23	TCA	5	live	High sch	48	non job	Familial	YES	YES	NO	NO
	1399	male	Not insu	Married	2.5	Urban	low	YES	NO	summer	2	tramadol	8	live	Diploma	46	self emp	Addictio	YES	NO	NO	NO
	1399	male	Social S	Widowed	2	Rura	low	NO	NO	autum	3	TCA	5	dead	Diploma	60	non job	Economic	YES	NO	NO	NO
	1399	male	General	Married	2	Rura	miled	NO	NO	autum	4	آمفت	8	live	High sch	52	non job	Addictio	YES	YES	NO	NO
	1399	female	Not insu	Married	2.5	Rura	low	NO	NO	autum	5	TCA	8	live	High sch	57	non job	Economic	YES	NO	NO	NO
	1399	male	Not insu	Single	2.5	Urban	low	YES	NO	winter	6	lorazpam	5	live	Primary	48	employee	Familial	YES	NO	NO	NO
	1399	male	Others	Widowed	3	Urban	miled	YES	NO	winter	7	alminium	8	live	High sch	43	self emp	Mental d	YES	NO	NO	NO
	1399	female	Not insu	Single	3.5	Rura	low	NO	NO	spring	8	javel wa	15	live	High sch	30	non job	Others	NO	NO	NO	NO
	1399	female	Not insu	Single	4	Rura	miled	NO	NO	spring	9	acetamin	8	live	Primary	52	non job	Familial	YES	NO	NO	NO
	1399	male	Iran Hea	Single	4	Rura	miled	YES	YES	summer	10	acetamin	5	live	Diploma	52	non job	Addictio	YES	YES	NO	NO
	1399	male	Social S	Single	1.55	Urban	high	YES	NO	autum	11	acetamin	8	live	Primary	52	self emp	Mental d	YES	NO	NO	NO
	1399	male	Social S	Single	1	Urban	high	YES	NO	autum	12	detergen	15	live	High sch	36	non job	Others	YES	NO	NO	NO
	1399	male	Iran Hea	Single	2.5	Urban	miled	YES	NO	autum	13	alminium	8	live	High sch	46	self emp	Economic	YES	NO	NO	NO
	1399	male	Not insu	Married	2	Rura	high	YES	NO	winter	14	alminium	5	live	Primary	45	non job	Familial	NO	NO	NO	NO
	1399	male	Iran Hea	Single	4	Urban	miled	NO	NO	spring	15	lorazpam	8	live	Diploma	52	self emp	Failure	YES	NO	NO	YES
	1399	male	Social S	Single	1.55	Urban	high	NO	NO	summer	16	TCA	5	live	Primary	52	non job	Familial	YES	NO	NO	NO
	1399	male	Social S	Single	1	Urban	high	YES	NO	autum	17	alminium	8	live	High sch	52	non job	Addictio	YES	NO	NO	YES
	1399	male	Iran Hea	Single	2.5	Urban	miled	YES	NO	autum	18	lorazpam	5	live	High sch	46	self emp	Economic	NO	NO	NO	NO
	1399	male	Not insu	Married	2	Rura	high	YES	NO	autum	19	alminium	8	live	Primary	45	employee	Addictio	YES	NO	NO	NO
	1399	female	Not insu	Single	5	Urban	miled	NO	NO	spring	20	alminium	3	dead	High sch	48	non job	Economic	NO	NO	NO	NO
	1399	male	Not insu	Widowed	4	Rura	low	YES	NO	summer	21	acetamin	8	live	High sch	49	employee	Familial	YES	NO	NO	NO
	1399	male	Not insu	Divorced	7	Urban	low	YES	NO	autum	22	acetamin	5	dead	High sch	74	employee	Economic	YES	NO	NO	NO
	1399	female	Not insu	Married	6	Rura	low	NO	NO	autum	23	acetamin	8	live	Primary	75	non job	Economic	YES	YES	NO	NO
	1399	male	Iran Hea	Single	4	Rura	low	YES	NO	autum	18	alminium	5	live	Primary	65	employee	Mental d	YES	NO	YES	NO
	1399	male	Social S	Widowed	3	Rura	high	YES	NO	winter	19	alminium	8	live	High sch	69	retired	Mental d	YES	YES	YES	NO
	1399	female	Social S	Divorced	2	Rura	low	NO	NO	winter	20	alminium	5	live	Primary	56	retired	Mental d	YES	NO	YES	NO
	1399	male	Iran Hea	Single	1.5	Rura	miled	YES	NO	spring	21	acetamin	9	live	Diploma	31	self emp	Unemploy	YES	NO	NO	NO
	1399	male	Not insu	Widowed	0.5	Urban	low	YES	NO	summer	22	detergen	15	live	Primary	32	employee	Others	NO	NO	NO	NO
	1399	male	Not insu	Divorced	6	Rura	low	YES	NO	autum	23	alminium	8	live	Diploma	63	retired	Mental d	NO	NO	NO	NO
	1399	female	Not insu	Widowed	3	Rura	miled	NO	NO	autum	6	acetamin	5	live	Primary	52	non job	Mental d	NO	NO	NO	NO
	1399	female	Not insu	Widowed	1	Rura	miled	NO	NO	autum	7	آمفت	8	live	High sch	55	non job	Addictio	YES	NO	NO	NO
	1399	male	Not insu	Single	2	Rura	miled	YES	NO	winter	8	javel wa	15	live	Primary	54	non job	Others	YES	NO	NO	NO
	1399	male	Not insu	Divorced	2.5	Urban	low	YES	NO	winter	9	آمفت	13	live	High sch	43	self emp	Addictio	NO	NO	NO	NO
	1399	female	Iran Hea	Married	2.5	Rura	low	NO	NO	spring	10	TCA	5	dead	Diploma	37	non job	Economic	YES	NO	NO	NO
	1399	male	Social S	Married	2	Rura	low	YES	NO	spring	11	lorazpam	8	live	Diploma	39	non job	Failure	NO	YES	NO	YES
	1399	male	Not insu	Married	3	Rura	high	YES	NO	summer	12	acetamin	5	live	Primary	33	self emp	Unemploy	YES	YES	NO	NO
	1399	male	Iran Hea	Single	3	Rura	low	YES	NO	autum	13	acetamin	8	live	High sch	31	non job	Unemploy	YES	YES	NO	NO
	1399	male	Iran Hea	Widowed	4	Urban	low	YES	NO	autum	14	alminium	8	live	Primary	46	non job	Mental d	YES	NO	NO	NO
	1399	female	Not insu	Divorced	5	Rura	low	NO	NO	autum	15	alminium	5	live	Primary	65	self emp	Mental d	YES	NO	NO	NO
	1399	male	Not insu	Single	2	Rura	miled	YES	NO	winter	16	alminium	8	live	Primary	54	employee	Mental d	NO	NO	NO	NO
	1399	male	Not insu	Divorced	2.5	Urban	low	YES	NO	spring	18	acetamin	5	live	High sch	33	employee	Unemploy	YES	NO	NO	NO
	1399	female	Iran Hea	Married	2.5	Rura	low	NO	NO	summer	19	acetamin	8	live	Diploma	30	self emp	Unemploy	YES	NO	NO	NO
	1399	male	Social S	Married	2	Rura	low	YES	NO	autum	20	alminium	5	live	Diploma	39	self emp	Mental d	YES	NO	NO	NO
	1399	male	Not insu	Married	3	Rura	high	YES	NO	autum	21	detergen	15	live	Primary	54	employee	Others	YES	NO	NO	NO
	1399	male	Iran Hea	Single	3	Rura	low	YES	NO	autum	22	آمفت	8	live	High sch	45	self emp	Addictio	YES	NO	NO	NO
	1399	male	Iran Hea	Widowed	4	Urban	low	YES	NO	spring	23	آمفت	5	live	Primary	46	self emp	Mental d	YES	NO	NO	NO
	1399	female	Not insu	Divorced	5	Rura	low	NO	NO	summer	23	آمفت	8	live	Primary	65	non job	Addictio	NO	NO	NO	NO
	1399	female	Not insu	Single	3	Rura	miled	NO	NO	autum	24	lorazpam	5	live	Primary	45	non job	Failure	NO	NO	NO	NO
	1399	female	Not insu	Widowed	2.5	Rura	low	NO	NO	autum	1	lorazpam	8	live	Primary	55	self emp	Failure	YES	NO	NO	NO
	1399	male	Not insu	Single	2	Rura	low	YES	NO	autum	2	alminium	5	live	Primary	46	non job	Mental d	YES	NO	NO	NO
	1399	male	Not insu	Single	2.5	Rura	low	YES	NO	winter	3	TCA	5	dead	Primary	57	non job	Mental d	YES	YES	NO	NO
	1399	male	Not insu	Divorced	4	Rura	low	YES	NO	winter	4	alminium	8	live	Primary	55	self emp	Mental d	YES	NO	NO	NO
	1399	male	Iran Hea	Widowed	3	Rura	low	YES	NO	spring	5	alminium	5	live	High sch	52	self emp	Familial	YES	NO	NO	NO
	1399	male	Not insu	Married	3.5	Urban	miled	NO	NO	summer	6	alminium	8	live	High sch	48	employee	Addictio	YES	YES	NO	NO
	1399	male	Not insu	Married	2.5	Urban	low	NO	NO	autum	7	javel wa	15	live	Diploma	46	employee	Others	YES	NO	NO	NO
	1399	male	Social S	Widowed	2	Rura	low	YES	NO	autum	8	acetamin	8	live	Diploma	29	employee	Unemploy	YES	NO	NO	NO
	1399	male	Not insu	Divorced	1	Rura	miled	NO	NO	autum	9	acetamin	5	live	Diploma	29	employee	Unemploy	YES	NO	NO	YES
	1399	male	Iran Hea	Divorced	1.5	Rura	low	NO	NO	winter	10	acetamin	8	live	High sch	32	self emp	Unemploy	NO	NO	NO	NO
	1399	female	Not insu	Widowed	3	Rura	low	NO	NO	winter	11	acetamin	8	live	High sch	31	non job	Unemploy	YES	NO	NO	NO
	1399	male	Not insu	Widowed	3	Urban	miled	YES	NO	spring	12	lorazpam	5	live	High sch	54	non job	Failure	YES	YES	NO	NO
	1399	male	Not insu	Single	2	Rura	low	YES	NO	spring	13	alchol	8	live	High sch	51	self emp	Mental d	YES	NO	NO	YES
	1399	male	General	Married	2	Rura	miled	YES	NO	summer	14	tramadol	8	live	High sch	52	non job	Familial	YES	NO	NO	YES
	1399	female	Not insu	Married	2.5	Rura	low	NO	NO	autum	15	TCA	6	dead	High sch	57	non job	Addictio	YES	NO	NO	NO
	1399	male	Not insu	Single	2.5	Urban	low	YES	NO	autum	16	آمفت	8	live	Primary	48	employee	Mental d	NO	NO	NO	NO
	1399	male	Others	Widowed	3	Urban	miled	YES	NO	autum	17	TCA	5	live	High sch	43	self emp	Addictio	YES	NO	NO	NO
	1399	female	Not insu	Single	3.5	Rura	low	NO	NO	winter	18	lorazpam	9	live	High sch	35	non job	Failure	YES	NO	NO	NO
	1399	female	Not insu	Single	4	Rura	miled	NO	NO	spring	19	alminium	3	dead	Primary	36	non job	Failure	YES	NO	NO	NO
	1399	male	Iran Hea	Single	4	Rura	miled	YES	NO	summer	20	lorazpam	8	live	Diploma	34	non job	Failure	NO	NO	NO	NO
	1399	male	Social S	Single	1.55	Urban	high	YES	NO	autum	21	lorazpam	5	live	Primary	35	self emp	Failure	YES	NO	NO	NO
	1399	male	Social S	Single	1	Urban	high	NO	NO	autum	22	alminium	8	live	High sch	36	non job	Mental d	NO	NO	NO	NO
	1399	male	Iran Hea	Single	2.5	Urban	miled	NO	NO	autum	23	lorazpam	5	live	High sch	46	self emp	Failure	YES	NO	NO	NO
	1399	male	Not insu	Married	2	Rura	high	YES	NO	spring	18	alminium	8	live	Primary	45	employee	Mental d	YES	NO	NO	NO
	1399	female	Not insu	Single	3	Urban	miled	NO	NO	summer	19	acetamin	5	live	Primary	32	non job	Unemploy	YES	YES	NO	NO
	1399	female	Not insu	Widowed	2.5	Rura	low	NO	NO	autum	20	acetamin	9	live	Primary	34	non job	Unemploy	YES	NO	NO	NO
	1399	male	Not insu	Single	2	Rura	low	YES	NO	autum	21	javel wa	15	live	Primary	35	self emp	Others	YES	YES	NO	NO
	1399	male	Not insu	Single	2.5	Rura	low	YES	NO	autum	22	acetamin	8	live	Primary	29	non job	Unemploy	YES	NO	NO	NO
	1399	male	Not insu	Divorced	4	Rura	low	NO	NO	winter	23	alminium	5	live	Primary	55	non job	Mental d	YES	NO	NO	NO
	1399	male	Iran Hea	Widowed	3	Rura	low	NO	NO	winter	6	alminium	8	live	High sch	52	self emp	Mental d	NO	NO	NO	NO
	1399	male	Not insu	Married	3.5	Urban	miled	YES	NO	spring	7	alminium	5	live	High sch	48	non job	Mental d	NO	NO	NO	NO
	1399	male	Not insu	Married	2.5	Urban	low	YES	NO	summer	8	acetamin	9	live	Diploma	46	self emp	Mental d	NO	NO	NO	NO
	1399	male	Social S	Widowed	2	Rura	low	NO	NO	autum	9	TCA	5	live	Diploma	60	non job	Familial	YES	NO	NO	NO
	1399	male	General	Married	2	Rura	miled	NO	NO	autum	10	alminium	8	live	High sch	52	non job	Mental d	YES	NO	NO	NO
	1399	female	Not insu	Married	2.5	Rura	low	NO	NO	autum	11	acetamin	5	dead	High sch	57	non job	Economic	NO	NO	NO	NO
	1399	male	Not insu	Single	2.5	Urban	low	YES	NO	winter	12	آمفت	8	live	Primary	48	employee	Addictio	YES	NO	YES	NO
	1399	male	Others	Widowed	3	Urban	miled	YES	NO	winter	1	TCA	5	live	High sch	43	self emp	Failure	NO	YES	NO	NO
	1399	female	Not insu	Single	3.5	Rura	low	NO	NO	spring	2	آمفت	8	live	High sch	35	non job	Mental d	YES	YES	NO	NO
	1399	female	Not insu	Single	4	Rura	miled	NO	NO	spring	3	lorazpam	5	live	Primary	36	non job	Familial	YES	YES	NO	NO
	1399	male	Iran Hea	Single	4	Rura	miled	YES	NO	summer	4	lorazpam	8	live	Diploma	34	employee	Addictio	YES	NO	NO	NO
	1399	male	Social S	Single	1.55	Urban	high	YES	NO	autum	5	alminium	5	live	Primary	35	employee	Economic	YES	NO	NO	NO
	1399	male	Social S	Single	1	Urban	high	YES	NO	autum	6	javel wa	15	live	High sch	36	employee	Others	NO	NO	NO	YES
	1399	male	Iran Hea	Single	2.5	Urban	miled	YES	NO	autum	7	alminium	8	live	High sch	46	self emp	Familial	YES	NO	NO	NO
	1399	male	Not insu	Married	2	Rura	high	YES	NO	winter	8	alminium	5	live	Primary	45	employee	Addictio	YES	NO	NO	NO
	1399	male	Iran Hea	Single	4	Urban	miled	NO	NO	spring	9	javel wa	15	live	Diploma	34	employee	Others	YES	NO	YES	NO
	1399	male	Social S	Single	1.55	Urban	high	NO	NO	summer	10	alminium	8	live	Primary	35	employee	Addictio	YES	NO	NO	NO
	1399	male	Social S	Single	1	Urban	high	YES	NO	autum	11	acetamin	5	live	High sch	45	employee	Unemploy	YES	NO	NO	NO
	1399	male	Iran Hea	Single	2.5	Urban	miled	NO	NO	autum	12	acetamin	8	live	High sch	34	self emp	Unemploy	YES	NO	NO	NO
	1399	male	Not insu	Married	2	Rura	high	NO	NO	autum	13	acetamin	5	live	Primary	35	employee	Unemploy	NO	NO	NO	NO
	1399	female	Not insu	Single	5	Urban	miled	NO	NO	spring	14	acetamin	9	live	High sch	48	non job	Familial	NO	NO	NO	NO
	1399	male	Not insu	Widowed	4	Rura	low	YES	NO	summer	15	TCA	5	live	High sch	49	self emp	Addictio	YES	NO	NO	NO
	1399	male	Not insu	Divorced	7	Urban	low	YES	NO	autum	16	alchol	8	live	High sch	74	non job	Economic	YES	NO	NO	NO
	1399	female	Not insu	Married	6	Rura	low	NO	NO	autum	17	tramadol	5	dead	Primary	75	non job	Mental d	YES	NO	NO	NO
	1399	male	Iran Hea	Single	4	Rura	low	YES	NO	autum	18	TCA	8	live	Primary	65	employee	Familial	YES	NO	NO	NO
	1399	male	Social S	Widowed	3	Rura	high	YES	NO	winter	19	detergen	15	live	High sch	69	retired	Others	YES	NO	NO	NO
	1399	female	Social S	Divorced	2	Rura	low	NO	NO	winter	20	TCA	8	live	Primary	56	retired	Economic	NO	NO	NO	NO
	1399	male	Iran Hea	Single	1.5	Rura	miled	NO	NO	spring	21	lorazpam	5	live	Diploma	58	retired	Addictio	YES	NO	NO	NO
	1399	male	Not insu	Widowed	0.5	Urban	low	NO	NO	summer	22	alminium	8	live	Primary	69	employee	Mental d	YES	YES	NO	NO
	1399	male	Not insu	Divorced	6	Rura	low	YES	NO	autum	23	acetamin	5	live	Diploma	63	employee	Familial	YES	NO	NO	NO
	1399	female	Not insu	Widowed	3	Rura	miled	NO	NO	autum	24	acetamin	8	live	Primary	52	non job	Addictio	YES	NO	NO	NO
	1399	female	Not insu	Widowed	1	Rura	miled	NO	NO	autum	1	acetamin	8	live	High sch	55	non job	Economic	YES	NO	NO	NO
	1399	male	Not insu	Single	2	Rura	miled	YES	NO	winter	2	acetamin	13	live	Primary	54	non job	Addictio	NO	NO	YES	NO
	1399	male	Not insu	Divorced	2.5	Urban	low	YES	NO	winter	3	acetamin	14	live	High sch	26	self emp	Unemploy	YES	NO	NO	NO
	1399	female	Iran Hea	Married	2.5	Rura	low	NO	NO	spring	4	alminium	8	live	Diploma	37	non job	Familial	YES	NO	NO	NO
	1399	male	Social S	Married	2	Rura	low	NO	NO	spring	5	alminium	5	live	Diploma	39	self emp	Addictio	YES	NO	NO	NO
	1399	male	Not insu	Married	3	Rura	high	NO	NO	summer	6	lorazpam	8	live	Primary	54	employee	Economic	NO	NO	NO	NO
	1399	male	Iran Hea	Single	3	Rura	low	YES	NO	autum	7	lorazpam	5	dead	High sch	45	self emp	Addictio	YES	NO	NO	NO
	1399	male	Iran Hea	Widowed	4	Urban	low	YES	NO	autum	8	alminium	9	live	Primary	46	self emp	Familial	NO	NO	NO	NO
	1399	female	Not insu	Divorced	5	Rura	low	NO	NO	autum	9	javel wa	15	live	Primary	65	non job	Others	YES	NO	NO	NO
	1399	male	Not insu	Single	2	Rura	miled	NO	NO	winter	10	alminium	12	live	Primary	54	self emp	Mental d	YES	NO	NO	NO
	1399	male	Not insu	Divorced	2.5	Urban	low	NO	NO	spring	11	TCA	6	dead	High sch	43	non job	Addictio	YES	NO	NO	NO
	1399	female	Iran Hea	Married	2.5	Rura	low	NO	NO	summer	12	acetamin	8	live	Diploma	37	self emp	Addictio	YES	YES	NO	NO
	1399	male	Social S	Married	2	Rura	low	YES	NO	autum	13	acetamin	5	live	Diploma	39	self emp	Economic	YES	NO	NO	NO
	1399	male	Not insu	Married	3	Rura	high	YES	NO	autum	14	acetamin	8	live	Primary	54	employee	Addictio	YES	NO	NO	NO
	1399	male	Iran Hea	Single	3	Rura	low	NO	NO	autum	15	alminium	5	live	High sch	45	self emp	Mental d	YES	NO	NO	NO
	1399	male	Iran Hea	Widowed	4	Urban	low	NO	NO	spring	16	alminium	9	live	Primary	46	self emp	Mental d	NO	NO	NO	NO
	1399	female	Not insu	Divorced	5	Rura	low	NO	NO	summer	18	detergen	15	live	Primary	65	non job	Others	YES	NO	NO	NO
	1399	male	Not insu	Single	2.5	Rura	miled	YES	NO	autum	19	acetamin	8	live	Primary	57	non job	Familial	YES	NO	NO	NO
	1399	male	Not insu	Divorced	4	Rura	low	YES	NO	autum	20	acetamin	9	live	Primary	55	self emp	Addictio	YES	NO	NO	NO
	1399	male	Iran Hea	Widowed	3	Rura	low	YES	NO	autum	21	alminium	8	live	High sch	52	non job	Familial	NO	NO	NO	NO
	1399	male	Not insu	Married	3.5	Urban	miled	YES	NO	winter	22	acetamin	13	live	High sch	48	employee	Addictio	YES	NO	NO	NO
	1399	male	Not insu	Married	2.5	Urban	low	YES	NO	winter	23	آمفت	13	live	Diploma	46	employee	Economic	NO	NO	NO	NO
	1399	male	Social S	Widowed	2	Rura	low	YES	NO	spring	23	آمفت	8	live	Diploma	60	employee	Addictio	YES	NO	NO	NO
	1399	male	Not insu	Divorced	1	Rura	miled	YES	NO	summer	18	آمفت	5	dead	Diploma	49	employee	Familial	YES	NO	NO	NO
	1399	male	Iran Hea	Divorced	1.5	Rura	low	YES	NO	autum	19	lorazpam	9	live	High sch	50	self emp	Addictio	YES	YES	NO	NO
	1399	female	Not insu	Widowed	3	Rura	low	NO	NO	autum	20	javel wa	15	live	High sch	55	non job	Others	YES	NO	NO	NO
	1399	male	Not insu	Widowed	3	Urban	miled	NO	NO	autum	21	acetamin	8	live	High sch	54	non job	Addictio	YES	YES	NO	NO
	1399	male	Not insu	Single	2	Rura	low	NO	NO	winter	22	acetamin	5	live	High sch	25	self emp	Unemploy	YES	NO	NO	YES
	1399	male	General	Married	2	Rura	miled	YES	NO	winter	23	alminium	8	live	High sch	52	non job	Mental d	YES	NO	YES	YES
	1399	female	Not insu	Married	2.5	Rura	low	NO	NO	spring	6	alminium	5	live	High sch	57	non job	Mental d	NO	NO	YES	YES
	1399	male	Not insu	Single	2.5	Urban	low	YES	NO	spring	7	alminium	8	live	Primary	48	employee	Mental d	NO	NO	YES	NO
	1399	male	Others	Widowed	3	Urban	miled	YES	NO	summer	8	acetamin	5	live	High sch	27	self emp	Unemploy	NO	NO	YES	NO
	1399	female	Not insu	Single	3.5	Rura	low	NO	NO	autum	9	TCA	5	live	High sch	35	non job	Familial	YES	NO	NO	YES
	1399	female	Not insu	Single	4	Rura	miled	NO	NO	autum	10	alminium	6	live	Primary	36	non job	Addictio	YES	NO	NO	YES
	1399	male	Iran Hea	Single	4	Rura	miled	YES	NO	autum	11	detergen	15	live	Diploma	34	employee	Others	NO	NO	NO	NO
	1399	male	Social S	Single	1.55	Urban	high	YES	NO	winter	12	آمفت	8	live	Primary	35	employee	Addictio	YES	NO	NO	NO
	1399	male	Social S	Single	1	Urban	high	YES	NO	spring	13	آمفت	5	live	High sch	36	employee	Familial	NO	YES	NO	YES
	1399	male	Iran Hea	Single	2.5	Urban	miled	YES	NO	summer	14	آمفت	12	live	High sch	46	self emp	Addictio	YES	YES	NO	NO
	1399	male	Not insu	Married	2	Rura	high	YES	NO	autum	15	lorazpam	8	live	Primary	45	employee	Economic	YES	YES	NO	NO
	1399	female	Not insu	Single	3	Urban	miled	NO	NO	autum	16	lorazpam	13	live	Primary	45	non job	Failure	YES	NO	NO	NO
	1399	female	Not insu	Widowed	2.5	Rura	low	NO	NO	autum	17	alminium	8	live	Primary	55	non job	Mental d	YES	NO	NO	NO
	1399	male	Not insu	Single	2	Rura	low	NO	NO	spring	18	alminium	5	dead	Primary	46	non job	Mental d	YES	YES	NO	NO
	1399	male	Not insu	Single	2.5	Rura	low	NO	NO	summer	19	alminium	9	live	Primary	57	non job	Mental d	YES	NO	NO	YES
	1399	male	Not insu	Married	3.5	Rura	low	YES	NO	autum	20	javel wa	15	live	High sch	48	non job	Others	YES	NO	NO	NO
	1399	male	Not insu	Married	2.5	Urban	low	YES	NO	autum	21	alminium	8	live	Diploma	46	non job	Familial	YES	YES	NO	NO
	1399	male	Social S	Widowed	2	Rura	low	YES	NO	autum	22	alminium	5	live	Diploma	60	non job	Addictio	YES	NO	NO	NO
	1399	male	General	Married	2	Rura	miled	YES	NO	winter	23	acetamin	8	live	High sch	52	non job	Economic	YES	NO	NO	NO
	1399	female	Not insu	Married	2.5	Rura	low	NO	NO	winter	24	javel wa	15	live	High sch	57	non job	Others	YES	NO	NO	NO
	1399	male	Not insu	Single	2.5	Urban	low	YES	NO	spring	1	acetamin	8	live	Primary	28	non job	Unemploy	NO	NO	NO	NO
	1399	male	Others	Widowed	3	Urban	miled	YES	NO	summer	2	acetamin	5	live	High sch	31	self emp	Unemploy	YES	NO	NO	NO
	1399	female	Not insu	Single	3.5	Rura	low	NO	NO	autum	3	TCA	5	live	High sch	35	non job	Failure	YES	YES	NO	NO
	1399	female	Not insu	Single	4	Rura	miled	NO	NO	autum	4	alchol	8	live	Primary	36	non job	Familial	YES	NO	NO	NO
	1399	male	Iran Hea	Single	4	Rura	miled	NO	NO	autum	5	tramadol	5	live	Diploma	34	self emp	Addictio	YES	NO	NO	NO
	1399	male	Social S	Single	1.55	Urban	high	NO	NO	spring	6	TCA	8	live	Primary	35	non job	Economic	YES	NO	NO	NO
	1399	male	Social S	Single	1	Urban	high	YES	NO	summer	7	آمفت	5	live	High sch	36	non job	Familial	NO	NO	NO	NO
	1399	male	Iran Hea	Single	2.5	Urban	miled	YES	NO	autum	8	TCA	9	live	High sch	46	non job	Addictio	YES	NO	NO	NO
	1399	male	Not insu	Married	2	Rura	high	YES	NO	autum	18	detergen	15	live	Primary	45	non job	Others	YES	NO	NO	NO
	1399	female	Not insu	Single	3	Urban	miled	NO	NO	autum	19	acetamin	8	live	Primary	45	non job	Addictio	YES	NO	NO	NO
	1399	female	Not insu	Widowed	2.5	Rura	low	NO	NO	winter	20	acetamin	5	live	Primary	32	non job	Unemploy	NO	NO	NO	NO
	1399	male	Not insu	Single	2	Rura	low	YES	NO	spring	21	acetamin	8	live	Primary	29	non job	Unemploy	YES	NO	NO	NO
	1399	male	Not insu	Single	2.5	Rura	low	YES	NO	summer	22	alminium	8	live	Primary	57	non job	Mental d	NO	NO	NO	NO
	1399	male	Not insu	Divorced	4	Rura	low	YES	NO	autum	23	alminium	5	dead	Primary	55	non job	Mental d	YES	NO	NO	NO
	1399	male	Iran Hea	Widowed	3	Rura	low	YES	NO	autum	15	lorazpam	8	live	High sch	52	self emp	Familial	YES	NO	NO	NO
	1399	male	Not insu	Married	3.5	Urban	miled	YES	NO	autum	16	lorazpam	10	live	High sch	48	employee	Addictio	YES	YES	NO	NO
	1399	male	Not insu	Married	2.5	Urban	low	YES	NO	spring	17	alminium	8	live	Diploma	46	employee	Economic	YES	NO	NO	NO
	1399	male	Social S	Widowed	2	Rura	low	YES	NO	summer	18	antiepli	12	live	Diploma	60	employee	Addictio	YES	YES	NO	NO
	1399	male	Not insu	Divorced	1	Rura	miled	YES	NO	autum	19	javel wa	15	live	Diploma	49	employee	Others	YES	NO	NO	YES
	1399	male	Iran Hea	Divorced	1.5	Rura	low	YES	NO	autum	20	pedistum	8	live	High sch	50	self emp	Economic	YES	NO	YES	NO
	1399	female	Not insu	Widowed	3	Rura	low	NO	NO	autum	21	alchol	5	live	High sch	19	non job	Falling	NO	NO	NO	NO
	1399	male	Not insu	Widowed	3	Urban	miled	NO	NO	winter	22	methadon	8	live	High sch	54	employee	Familial	NO	NO	NO	NO
	1399	male	Not insu	Single	2	Rura	low	NO	NO	winter	23	alchol	8	live	High sch	20	employee	Falling	NO	NO	NO	NO
	1399	male	General	Married	2	Rura	miled	YES	NO	spring	24	alchol	5	live	High sch	21	employee	Falling	YES	NO	NO	NO
	1399	female	Not insu	Married	2.5	Rura	low	NO	NO	summer	1	alchol	8	live	High sch	19	non job	Falling	YES	NO	NO	NO
	1399	male	Not insu	Single	2.5	Urban	low	YES	NO	autum	2	pedistum	5	live	Primary	48	employee	Economic	NO	NO	NO	NO
	1399	male	Others	Widowed	3	Urban	miled	YES	NO	autum	3	antiepli	8	live	High sch	43	self emp	Mourning	YES	NO	NO	NO
	1399	female	Not insu	Single	3.5	Rura	low	NO	NO	autum	4	opium	5	dead	High sch	35	non job	Addictio	NO	YES	NO	NO
	1399	female	Not insu	Single	4	Rura	miled	NO	NO	winter	5	opium	9	live	Primary	36	non job	Addictio	YES	YES	NO	NO
	1399	male	Iran Hea	Single	4	Rura	miled	YES	NO	winter	6	detergen	15	live	Diploma	34	employee	Others	YES	YES	NO	NO
	1399	male	Social S	Single	1.55	Urban	high	NO	NO	spring	7	antiepli	8	live	Primary	35	employee	Mourning	YES	NO	NO	NO
	1399	male	Social S	Single	1	Urban	high	NO	NO	spring	8	antiepli	5	live	High sch	36	employee	Mourning	YES	NO	NO	NO
	1399	male	Iran Hea	Single	2.5	Urban	miled	YES	NO	summer	9	antiepli	8	live	High sch	46	self emp	Familial	NO	NO	NO	NO
	1399	male	Not insu	Married	2	Rura	high	YES	NO	autum	10	antiepli	5	live	Primary	45	employee	Addictio	YES	NO	NO	NO
	1399	female	Not insu	Single	3	Urban	miled	NO	NO	autum	11	antiepli	8	live	Primary	45	non job	Economic	YES	NO	NO	NO
	1399	female	Not insu	Widowed	2.5	Rura	low	NO	NO	autum	12	antiepli	5	live	Primary	55	employee	Addictio	YES	NO	YES	NO
	1399	male	Not insu	Single	2	Rura	low	YES	NO	winter	13	antiepli	9	live	Primary	46	employee	Familial	YES	NO	NO	NO
	1399	male	Not insu	Single	2.5	Rura	low	YES	NO	spring	14	TCA	5	live	Primary	57	employee	Addictio	YES	NO	NO	NO
	1399	male	Not insu	Divorced	4	Rura	low	YES	NO	summer	15	opium	8	live	Primary	55	employee	Economic	YES	NO	NO	NO
	1399	male	Iran Hea	Widowed	3	Rura	low	YES	NO	autum	16	pedistum	5	live	High sch	52	self emp	Addictio	NO	NO	NO	NO
	1399	male	Not insu	Married	3.5	Urban	miled	YES	NO	autum	17	opium	8	live	High sch	48	employee	Addictio	NO	NO	NO	NO
	1399	male	Not insu	Married	2.5	Urban	low	YES	NO	autum	18	methadon	5	dead	Diploma	46	employee	Familial	YES	NO	NO	NO
	1399	male	Social S	Widowed	2	Rura	low	YES	NO	spring	19	javel wa	15	live	Diploma	19	employee	Others	YES	NO	NO	NO
	1399	male	General	Married	2	Rura	miled	YES	NO	summer	20	alchol	8	live	High sch	18	employee	Falling	YES	NO	NO	NO
	1399	female	Not insu	Married	2.5	Rura	low	NO	NO	autum	21	alchol	5	live	High sch	19	non job	Falling	YES	NO	NO	NO
	1399	male	Not insu	Single	2.5	Urban	low	YES	NO	autum	22	pedistum	8	live	Primary	48	employee	Economic	YES	NO	NO	NO
	1399	male	Others	Widowed	3	Urban	miled	YES	NO	autum	23	pedistum	5	live	High sch	43	self emp	Economic	NO	NO	NO	NO
	1399	female	Not insu	Single	3.5	Rura	low	NO	NO	winter	24	pedistum	8	live	High sch	35	non job	Economic	YES	NO	NO	NO
	1399	female	Not insu	Single	4	Rura	miled	NO	NO	winter	1	pedistum	5	live	Primary	36	non job	Economic	YES	YES	NO	NO
	1399	male	Iran Hea	Single	4	Rura	miled	NO	NO	spring	2	alchol	8	live	Diploma	34	employee	Falling	YES	NO	NO	NO
	1399	male	Social S	Single	1.55	Urban	high	NO	NO	summer	3	alminium	3	dead	Primary	35	non job	Mourning	YES	NO	NO	NO
	1399	male	Social S	Single	1	Urban	high	YES	NO	autum	4	antiepli	8	live	High sch	36	non job	Familial	YES	NO	NO	NO
	1399	male	Iran Hea	Single	2.5	Urban	miled	YES	NO	autum	5	antiepli	5	live	High sch	46	non job	Addictio	NO	NO	NO	NO
	1399	male	Not insu	Married	2	Rura	high	YES	NO	autum	1	methadon	8	live	Primary	45	non job	Economic	YES	NO	NO	NO
	1399	male	Iran Hea	Single	4	Urban	miled	YES	NO	winter	2	opium	5	live	Diploma	34	non job	Addictio	YES	NO	NO	NO
	1399	male	Social S	Single	1.55	Urban	high	YES	NO	winter	3	TCA	5	live	Primary	35	non job	Addictio	YES	NO	NO	NO
	1399	male	Social S	Single	1	Urban	high	NO	NO	spring	4	alchol	8	live	High sch	36	non job	Falling	NO	NO	NO	NO
	1399	male	Iran Hea	Single	2.5	Urban	miled	NO	NO	spring	5	pedistum	5	live	High sch	46	non job	Economic	YES	NO	NO	YES
	1399	male	Not insu	Married	2	Rura	high	YES	NO	summer	6	opium	8	live	Primary	45	non job	Addictio	NO	NO	NO	YES
	1399	female	Not insu	Single	5	Urban	miled	NO	NO	autum	7	pedistum	8	live	High sch	48	non job	Economic	YES	NO	NO	YES
	1399	male	Not insu	Widowed	4	Rura	low	YES	NO	autum	8	alchol	5	dead	High sch	22	non job	Falling	YES	NO	NO	YES
	1399	male	Not insu	Divorced	7	Urban	low	YES	NO	autum	9	antiepli	8	live	High sch	74	employee	Mental d	YES	NO	NO	NO
	1399	female	Not insu	Married	6	Rura	low	NO	NO	winter	10	opium	5	live	Primary	75	non job	Addictio	YES	YES	NO	NO
	1399	male	Iran Hea	Single	4	Rura	low	YES	NO	spring	11	javel wa	15	live	Primary	65	non job	Others	YES	NO	NO	YES
	1399	male	Social S	Widowed	3	Rura	high	YES	NO	summer	12	alchol	8	live	High sch	32	non job	Falling	YES	NO	NO	YES
	1399	female	Social S	Divorced	2	Rura	low	NO	NO	autum	13	methadon	5	live	Primary	56	non job	Familial	YES	NO	NO	NO
	1399	male	Iran Hea	Single	1.5	Rura	miled	YES	NO	autum	14	detergen	15	live	Diploma	58	non job	Others	NO	NO	NO	NO
	1399	male	Not insu	Widowed	0.5	Urban	low	YES	NO	autum	15	alchol	8	live	Primary	69	non job	Economic	YES	NO	NO	YES
	1399	male	Not insu	Divorced	6	Rura	low	YES	NO	spring	16	alchol	5	live	Diploma	63	non job	Addictio	YES	NO	NO	NO
	1399	female	Not insu	Widowed	3	Rura	miled	NO	NO	summer	17	pedistum	8	live	Primary	52	non job	Economic	YES	NO	NO	YES
	1399	female	Not insu	Widowed	1	Rura	miled	NO	NO	autum	18	antiepli	8	live	High sch	55	non job	Mourning	NO	NO	NO	NO
	1399	male	Not insu	Single	2	Rura	miled	NO	NO	autum	19	opium	5	live	Primary	54	non job	Addictio	YES	NO	NO	YES
	1399	male	Not insu	Divorced	2.5	Urban	low	YES	NO	autum	20	opium	8	live	High sch	43	non job	Addictio	NO	NO	NO	YES
	1399	female	Iran Hea	Married	2.5	Rura	low	NO	NO	winter	21	TCA	5	live	Diploma	37	self emp	Addictio	YES	NO	NO	YES
	1399	male	Social S	Married	2	Rura	low	YES	NO	winter	18	antiepli	8	live	Diploma	39	self emp	Mourning	YES	NO	NO	YES
	1399	male	Not insu	Married	3	Rura	high	YES	NO	spring	19	antiepli	5	dead	Primary	54	employee	Familial	YES	YES	NO	YES
	1399	male	Iran Hea	Single	3	Rura	low	YES	NO	summer	20	antiepli	8	live	High sch	45	self emp	Addictio	YES	NO	NO	NO
	1399	male	Iran Hea	Widowed	4	Urban	low	YES	NO	autum	21	antiepli	5	live	Primary	46	self emp	Economic	YES	YES	NO	NO
	1399	female	Not insu	Divorced	5	Rura	low	NO	NO	autum	22	javel wa	15	live	Primary	65	non job	Others	YES	NO	NO	YES
[truncated: 264 more rows]
